# Supplementary material for: Qualitative exploration of sociocultural determinants of health inequities of Dalit population in Dhaka City, Bangladesh
Source: PubMed Central journal article supplement — BMJ Open. 2018 Dec 14;8(12):e022906. doi: 10.1136/bmjopen-2018-022906 (PMC6303619; doi:10.1136/bmjopen-2018-022906), 2018-12-14
Supplement: bmjopen-2018-022906.draft_revisions.pdf [file bmjopen-2018-022906.draft_revisions.pdf]

# BMJ Open

BMJ Open is committed to open peer review. As part of this commitment we make the peer review history of every article we publish publicly available.

When an article is published we post the peer reviewers' comments and the authors' responses online. We also post the versions of the paper that were used during peer review. These are the versions that the peer review comments apply to.

The versions of the paper that follow are the versions that were submitted during the peer review process. They are not the versions of record or the final published versions. They should not be cited or distributed as the published version of this manuscript.

BMJ Open is an open access journal and the full, final, typeset and author-corrected version of record of the manuscript is available on our site with no access controls, subscription charges or pay-per-view fees (<http://bmjopen.bmj.com>).

If you have any questions on BMJ Open's open peer review process please email [info.bmjopen@bmj.com](mailto:info.bmjopen@bmj.com)

# BMJ Open

## Exploring socio-cultural determinants of health inequities: Experiences of Dalit population in Dhaka City, Bangladesh

|                               |                                                                                                                                                                                                 |
|-------------------------------|-------------------------------------------------------------------------------------------------------------------------------------------------------------------------------------------------|
| Journal:                      | <i>BMJ Open</i>                                                                                                                                                                                 |
| Manuscript ID                 | bmjopen-2018-022906                                                                                                                                                                             |
| Article Type:                 | Research                                                                                                                                                                                        |
| Date Submitted by the Author: | 15-Mar-2018                                                                                                                                                                                     |
| Complete List of Authors:     | Kabir, Ashrafal; Dushtha Shasthya Kendra , Research<br>Maitrot, Mathilde ; The University of York, Department of Social Policy and<br>Social Work<br>Ali, Ahsan; Dhaka University, Anthropology |
| Keywords:                     | caste, Dalit, qualitative method, sociocultural determinants, health<br>inequalities, untouchability                                                                                            |
|                               |                                                                                                                                                                                                 |

SCHOLARONE™  
Manuscripts

Peer Review Only

1  
2  
3  
4 1 **Exploring sociocultural determinants of health inequities: Experiences of**  
5  
6  
7 2 ***Dalit* population in Dhaka City, Bangladesh**  
8  
9

10 3 **Short Title: Socio-cultural determinants of health inequities: Dalit population,**  
11  
12  
13 4 **Bangladesh**  
14  
15

16 5 Ashraful Kabir,<sup>1ab\*</sup>,  
17

18  
19 6 Email: [ashraful.icddrb@gmail.com](mailto:ashraful.icddrb@gmail.com)  
20  
21

22 7 Mathilde Rose Louise Maitrot,<sup>2</sup>  
23

24  
25 8 Email: [mathildemaitrot@gmail.com](mailto:mathildemaitrot@gmail.com)  
26  
27

28 9 Ahsan Ali<sup>3b</sup>  
29

30  
31 10 Email: [israabd@gmail.com](mailto:israabd@gmail.com)  
32

33 11 <sup>1</sup>Dushtha Shasthya Kendra, Dhaka, Bangladesh  
34  
35

36 12 <sup>2</sup>Department of Social Policy and Social Work, The University of York, United Kingdom  
37  
38

39 13 <sup>3</sup>Department of Anthropology, Dhaka University, Bangladesh  
40  
41

42 14 <sup>a</sup>Dushtha Shasthya Kendra, Dhaka, Bangladesh  
43

44 15 <sup>b</sup>Department of Anthropology, Dhaka University, Bangladesh  
45  
46

47 16 **\*Corresponding author**  
48  
49

50 17 Email: [ashraful.icddrb@gmail.com](mailto:ashraful.icddrb@gmail.com)  
51  
52  
53  
54  
55  
56  
57  
58  
59  
60

## 18 ABSTRACT

19 **Objectives:** In recent years Bangladesh has made remarkable advances in health outcomes;  
20 however, the benefits of these gains are unequally shared amongst citizens and population  
21 groups. Among others, Dalits (*jaat* sweepers), a marginalised traditional working community,  
22 have relatively poor access to healthcare services. This study sought to explore the socio-political  
23 and cultural factors associated with health inequalities among Dalits in an urban setting.

24 **Design:** An exploratory qualitative study design was adopted. The acquired data was analysed  
25 using an iterative approach which incorporated deductive and inductive methods in identifying  
26 codes and themes.

27 **Settings:** This study was conducted in two sweeper communities in Dhaka city.

28 **Participants:** Participants were Dalit men and women (fourteen in-depth interviews, mean  
29 age±SD 30±10; and five focus group discussions), and the community leaders and NGO workers  
30 (seven key informant interviews).

31 **Results:** The health status of members of these Dalit groups is determined by an array of social,  
32 economic and political factors. As Dalits (untouchables) are typically considered to fall outside  
33 the caste-based social structure and existing vulnerabilities are embedded and reinforced by this  
34 identity. Dalits' experience of precarious access to healthcare or poor healthcare is an important  
35 manifestation of these inequalities and has implications for the economic and social life of Dalit  
36 populations living together in geographically constrained spaces.

37 **Conclusions:** The provision of clinical healthcare services alone is insufficient to mitigate the  
38 negative effects of discriminations and to improve the health status of Dalits. A better

1  
2  
3 39 understanding of the precise influences of socio-cultural determinants of health inequalities is  
4  
5 40 needed, together with the identification of the strategies and programmes needed to address these  
6  
7  
8 41 determinants with the aim of developing more inclusive health service delivery systems.  
9

10  
11 42 **Key Words:** Bangladesh; caste; Dalit; qualitative method; sociocultural determinants; health  
12  
13 43 inequalities; social exclusion; untouchability  
14  
15

#### 16 44 **Strengths and limitations of this study**

- 17  
18  
19 45 • This study used the ‘Commission on Social Determinants of Health Conceptual  
20  
21 46 Framework’ proposed by the World Health Organization (WHO) which allow us to  
22  
23 47 investigate how a set of social, cultural, economic and political elements interact and play  
24  
25  
26 48 a determining role in shaping Dalits’ health status.
- 27  
28 49 • To the best of our knowledge this is the first study that comprehensively explains how  
29  
30  
31 50 socio-cultural and political elements are interconnected and produces, sustain, and  
32  
33 51 reinforce health inequality among the Dalit population in Bangladesh.
- 34  
35 52 • To analyse the qualitative data we used an iterative approach which blended deductive  
36  
37 53 and inductive methods to identify and generate codes and themes.
- 38  
39  
40 54 • The main limitation is that the sample size is unavoidably small; therefore, the  
41  
42 55 generalizability of the findings to other areas might be limited due to the contextual  
43  
44 56 characteristics. Nonetheless, considering the data collected, we believe that this study  
45  
46  
47 57 provides an in-depth understanding of the determinants of health inequalities among Dalit  
48  
49 58 population in Bangladesh.  
50

51  
52 59  
53  
54  
55  
56  
57  
58  
59  
60

## 60 BACKGROUND

61 In recent years Bangladesh has achieved remarkable progress in terms of health targets, with  
62 declining maternal and neonatal mortality rates, increased immunisation coverage, greater life  
63 expectancy at birth, and increased vitamin A supplementation<sup>1;2</sup>. However, these advances are  
64 experienced unequally across the population, often leaving behind individuals and communities  
65 that are economically marginalised and socially excluded. Improved health services, especially  
66 those provided by the state, are not yet effectively distributed to all individuals and groups, and  
67 frequently fail to reach ethnic minorities, people living in remote areas, extremely poor  
68 individuals, slum and pavement dwellers, and other marginalised groups<sup>3</sup>. This paper focuses on  
69 analysing the healthcare barriers experienced by one marginalised group, the Dalits, the  
70 untouchables.

71 Bob et al.<sup>25</sup> explain that the word 'Dalit' comes from the Marathi language and means  
72 suppressed, 'broken up', downtrodden or oppressed, and the term was first used by Dr B. R.  
73 Ambedkar during the late period of British colonial rule. The Dalits of Bangladesh are a  
74 marginalised group whose identity is often characterised by the manual and low-status nature of  
75 their occupations. This social positioning is strongly associated with their ancestral occupations,  
76 which were typically considered unclean and impure. In the 1872 census conducted in Bengal,  
77 the majority of Dalits were referred to by the term *Chandala*, a Sanskrit word for someone who  
78 deals with the disposal of corpses, a Hindu outcaste. In 2017 they are often called *Harijan*, a  
79 term coined by Mahatma Gandhi meaning 'children of God', or more commonly referred to by  
80 their occupation, family descent, ethnicity, or derogatory terms. The dalits often engage in  
81 sweeping activities, such as cleaning latrines, removing rubbish, skinning cattle, and sweeping

1  
2  
3 82 streets and houses. They scavenge in Bangladesh's cities and towns, and are designated as  
4  
5 83 'untouchable' within the caste system of the Indian subcontinent <sup>4,5</sup>.

6  
7  
8 84 Healthcare issues of the Dalit in Bangladesh remain largely neglected in the national  
9  
10 85 government's development agenda <sup>6,7</sup>, despite its strong constitutional commitment to 'not  
11  
12 86 discriminate against any citizen on grounds only of religion, race, caste, sex or place of birth'  
13  
14 87 (The Bangladesh Constitution of 1972, Article 28 (1). While no precise official statistics are  
15  
16 88 available regarding the number of Dalits, various sources estimate the population at around 5.5  
17  
18 89 million <sup>8</sup>, approximately 3-4% of Bangladesh's total population. The lack of official data on this  
19  
20 90 population group indicates the lack of political will to recognise Dalits and the existence of these  
21  
22 91 communities in Bangladesh.

23  
24  
25  
26  
27 92 Prior studies indicate that health inequalities are determined by broader societal factors, such as  
28  
29 93 socio-economic position, housing conditions, working environment, poverty, access to and  
30  
31 94 control of resources, education, and employment <sup>9-13</sup>. A firm understanding of sociocultural  
32  
33 95 determinants of health inequalities, and also of the factors which restrict access to health  
34  
35 96 services, is critical to improving the health outcomes of marginalised communities, <sup>14</sup>. Several  
36  
37 97 studies in Bangladesh have highlighted the socio-economic issues and discrimination  
38  
39 98 encountered by the Dalit population; however, the socio-political and cultural factors that  
40  
41 99 contribute to generating severe health inequalities remain largely unexplored.

42  
43  
44  
45  
46  
47 100 This present study explores the political, social, economic, and cultural determinants of health  
48  
49 101 inequalities experienced by the majority of the Dalit population. We examine how caste-based  
50  
51 102 positions generate and reinforce social stratification in society, and determine health inequities  
52  
53 103 within two Dalit population groups in Bangladesh. We argue that health inequalities need to be

1  
2  
3 104 viewed from a holistic perspective, keeping in mind the intersecting social, political and  
4  
5 105 structural forces.  
6  
7

## 8 9 106 **MATERIALS AND METHODS**

### 10 11 12 107 **Conceptual Framework**

13  
14  
15 108 Our inquiry was shaped by the ‘Commission on Social Determinants of Health (CSDH)  
16  
17 109 Conceptual Framework’ proposed by the World Health Organization (WHO) in 2010<sup>15</sup>. This  
18  
19  
20 110 framework offers a dynamic analytical configuration of the key social institutions and political  
21  
22 111 structures that affect and shape the health of a population. It explains health status as a social  
23  
24 112 phenomenon that is produced, configured and sustained through a complex and dynamic  
25  
26 113 interplay of a set of context-embedded factors. Importantly, it also emphasises the need to  
27  
28 114 distinguish the mechanisms that generate and reproduce social hierarchies and their multiple  
29  
30 115 manifestations. The conceptual framework includes three interactive levels of dynamic  
31  
32 116 influences: the wider socio-political context, individual socio-economic position, and  
33  
34 117 intermediary socio-economic influences.  
35  
36  
37  
38

39 118 **Fig 1** Commission on Social Determinants of Health (CSDH) Conceptual Framework [adapted from the  
40  
41 119 WHO (2010)] [to be placed]

42  
43 120  
44  
45  
46 121 The first level, the socio-political context, focuses on the social relationships within a society  
47  
48 122 which organise and configure hierarchies and social stratification by defining individual  
49  
50 123 positions and roles. This includes the labour market, the educational system, and political  
51  
52 124 institutions. The second level considers individual or groups of individuals’ positionality in the  
53  
54 125 relation to these macro-structures and mechanisms. It understands individual socio-economic  
55  
56  
57  
58



1  
2  
3 126 position as a function of the degree of exposure to health risks and vulnerabilities that result in  
4  
5 127 differential health outcomes for an individual and/or a population. Key structured individual  
6  
7  
8 128 socio-economic elements include income, education, occupation, level of knowledge and  
9  
10 129 information. Combined with structural elements, the individual socio-economic context  
11  
12 130 'structural determinant' is constructed. Thus structural determinants are rooted in socio-  
13  
14  
15 131 economic institutions, policies and political context that construct, reinforce, and maintain social  
16  
17 132 hierarchies in various social systems, institutions, policies and sociocultural values.

18  
19  
20 133 The intermediary socio-economic context refers to a circumstance whereby an individual and/or  
21  
22 134 group have a distinct experience of materials, behavioural options, psychological supports, and  
23  
24 135 healthcare facilities that consecutively shape specific determinants of health status (intermediary  
25  
26 136 determinants). Therefore, this framework summarises and synthesises the view that social  
27  
28 137 determinants of health inequality are constructed, functioning, and sustained through the act of  
29  
30 138 long causal interceding factors (Figure 1).

31  
32  
33  
34  
35 139 Although other frameworks have been developed to understand the social determinants of health,  
36  
37 140 we found this conceptual framework particularly useful for exploring the dynamic relationships  
38  
39 141 between social structures and political determinants of health inequalities. Several contemporary  
40  
41 142 models, for example the psychosocial, social production of diseases/political economy of health,  
42  
43 143 and the eco-social models, tend to explain disease distribution rather than focusing on the  
44  
45 144 mechanism of disease causation<sup>16-19</sup>. Therefore, in contrast to the WHO model, these  
46  
47 145 frameworks leave contextual and socio-political aspects of health inequalities largely  
48  
49 146 unexplored. The results presented in this paper are provided together with an exploration of the  
50  
51 147 socio-economic settings following the CSDH Conceptual Framework.

## 148 **Study Population and Settings**

149 This study was conducted in two sweeper communities in Dhaka city: the *Agargoan* Public  
150 Works Department (PWD) Sweeper Colony, which is located adjacent to Dhaka Orthopaedic  
151 Hospital, and the Ganaktuli sweeper colony located in the city's Hazaribough area. Commonly,  
152 the sweepers in Agargoan and Ganakatuli are known as *Telegu* and *Kanpuri*, respectively. There  
153 are no official statistics providing precise population figures for these colonies, although  
154 secondary sources indicate that each includes approximately 1,000 families<sup>8</sup>.

## 155 **Sampling Strategy**

156 Between August and October 2014 the first author conducted interviews and focus group  
157 discussions (FGDs, henceforth) with members of these Dalit *colonies*. We purposefully selected  
158 the study participants to address specific research objectives, and following the inclusion criteria,  
159 we included people aged 18 years and above and those who voluntarily agreed to participate.  
160 Using several data collection tools we achieved maximum variation within the sample, collecting  
161 data from participants with various backgrounds, e.g. household members, community leaders,  
162 and members of non-governmental organisations (NGOs, henceforth)<sup>20</sup>.

163 We conducted 14 in-depth interviews (IDIs, henceforth) with household members from the Dalit  
164 community who had sought healthcare in different public and private facilities. We invited  
165 individuals to open group discussions on health status and health-seeking behaviour, and invited  
166 those individuals who showed a proactive interest in the study for interviews (IDIs, FGDs). The  
167 context in which the research was conducted required a high degree of iteration and flexibility in  
168 order to build coherence and maximise the validity of the data collected. For example, a subtype

1  
2  
3 169 of purposive sampling known as snowballing or chain sampling <sup>21</sup> was used to select individuals  
4  
5 170 who had experienced discrimination of a specific nature or means.  
6  
7  
8 171 We also conducted seven key informant interviews (KIIs, henceforth) with community and  
9  
10 172 religious leaders, and also NGO worker, in order to better understand the exclusion process  
11  
12 173 experienced by Dalits in these specific locations. Finally, we conducted five FGDs to help  
13  
14 174 understand communal perceptions and attitudes regarding entitlement to access basic public  
15  
16 175 services. In addition, the authors used participant observations and informal conversations with  
17  
18 176 some non-Dalit (converted Muslim) individuals who lived in the area to further understand the  
19  
20 177 dynamics at play. Many of these informants operated small businesses (e.g. tea stall, plastic  
21  
22 178 shop, video game shop etc.) within and around the sweeper colonies. Finally, we re-visited the  
23  
24 179 participant groups to triangulate the emerging themes and cross-check the accuracy of the data  
25  
26 180 collected. The data collection process ceased when the authors reached a suitable understanding  
27  
28 181 of the key specific historical, socio-cultural belief systems influencing the process of  
29  
30 182 discrimination, marginalisation and stigmatisation <sup>22;23</sup>.  
31  
32  
33  
34  
35  
36

### 37 **Data Collection Procedure**

38  
39  
40 184 In order to gather information in a semi-structured and systematic manner, we developed an  
41  
42 185 interview schedule. This document was used to guide conversations around key dimensions  
43  
44 186 relevant to our research questions and objectives, including socio-economic, demographic, and  
45  
46 187 political issues that impact upon health conditions among the Dalit population and/or individuals.  
47  
48 188 Interviews were semi-structured in order to create a friendly rapport with respondents and leave  
49  
50 189 sufficient space for other themes to emerge. Open-ended questions were used to explore the  
51  
52 190 socio-political and economic factors affect their health services. For example, we wanted to learn  
53  
54  
55  
56  
57  
58  
59  
60

191 more about participants' healthcare-seeking behaviours, experiences when attempting to access  
192 healthcare facilities, health information, and interactions with healthcare workers.

193 We conducted all except one of the interviews and FDGs in Bengali, a language spoken by the  
194 researchers (first author) and most of the participants, while an interpreter was used to interview  
195 elderly Dalit men and women who only spoke Telegu and Hindi. On average, IDIs lasted 45 to  
196 60 minutes and FDGs between 90 and 120 minutes. After obtaining the participants' consent,  
197 IDIs and FGDs were electronically recorded, before being transcribed verbatim and subsequently  
198 translated into English. In some cases, several follow-up visits were made to obtain missing  
199 information, as well as to enable further probing of some issues. In addition, the authors took  
200 detailed field notes during the conversations.

## 201 **Data Analysis**

202 To analyse the qualitative data we used an iterative approach which blended deductive and  
203 inductive methods to identify and generate codes and themes. Initially, a deductive approach was  
204 used through the use of interview guides, which provided a primary template for the framework  
205 of data coding. The researchers independently read and reread a few transcripts and identified  
206 codes which were incorporated into the coding framework in an inductive form which mirrored  
207 the ideas, perceptions, practices, and concepts, concentrating on the health and health services of  
208 the participants. After coding all of the interviews we looked for clusters of several codes, which  
209 were termed 'themes' or 'concepts'. Focusing on rigour-related criteria in qualitative research,  
210 such as credibility, transferability, dependability and conformability, a consensus was established  
211 by resolving coding differences after discussions among the research team. Throughout the  
212 analysis, systematically examined meaningful statements were assigned to the relevant code, and

1  
2  
3 213 the relationship between the themes was then examined<sup>24</sup>. The analysis process was adequately  
4  
5 214 accomplished by the team of researchers, who have different educational backgrounds and  
6  
7 215 training, through regular collaboration and discussions, self-reflexivity, and triangulation of  
8  
9 216 method and context (field sites), ensuring that no one researcher's view was predominant.  
10  
11  
12

### 13 217 **Patient and Public Involvement**

14  
15  
16 218 In this study we did not involve any patient. However, we purposefully selected men, women  
17  
18 219 community leaders, and NGO workers in the interview. We entered the community, built rapport  
19  
20 220 and invited the participants for the interview following a pre-set inclusion criteria such as people  
21  
22 221 aged 18 years and above, voluntary participation, and pro-activeness to join in the group  
23  
24 222 discussion. We used an iterative approach which incorporated deductive and inductive methods  
25  
26 223 in framing research questions and identifying codes and themes.  
27  
28  
29

### 30 224 **Ethical Considerations**

31  
32  
33  
34 225 The study protocol was approved and ethical approval was obtained from the 'ethics review  
35  
36 226 committee' at Dhaka University, Bangladesh. Written informed consent was taken and  
37  
38 227 documented via audio recording. Before obtaining consent the research objectives were  
39  
40 228 explained, together with the importance of the study, confidentiality rules, possible harms and  
41  
42 229 benefits, and the participants' right to withdraw from the interviews at any stage during the  
43  
44 230 conversation. Personal and households information, including age, sex, education, occupation,  
45  
46 231 marital status, family composition and religion, was collected; however, the confidentiality of the  
47  
48 232 personal identification of all participants was strictly maintained, with these details only being  
49  
50 233 used by the researchers. Data was analysed using the participant identification (ID) number only  
51  
52 234 and these ID number were removed prior to reporting the findings.  
53  
54  
55  
56  
57  
58  
59

## 235 RESULTS

### 236 Characteristics of the Participants

237 We firstly describe the socio-demographic characteristics of the participants before presenting  
 238 our results. Table 1 shows the characteristics of the study participants, who ranged in age  
 239 between 22 and 64, and had a mean age of 30 (SD±10) years. More than half of the participants  
 240 (9 out of 14) had received no formal schooling, which is far below the national level of over  
 241 60%. Overall, participants had received a mean of 2.9 (SD±1.3) years of schooling, and only  
 242 three had received any education above the primary level.

243 **Table 1 Socio-demographic backgrounds of the in-depth interview participants (*n* = 14)**

| Characteristics                  | Study Area |           | Combined |
|----------------------------------|------------|-----------|----------|
|                                  | Agargoan   | Ganaktuli |          |
| Age in years (mean ±SD)          | 27±8       | 3±9       | 30±10    |
| <b>Education</b>                 |            |           |          |
| 1–5 years ( <i>n</i> )           | 1          | 2         | 3        |
| 6–10 years ( <i>n</i> )          | 0          | 2         | 2        |
| No formal schooling ( <i>n</i> ) | 5          | 4         | 9        |
| Schooling in years (mean ± SD)   | 2.6±1.2    | 3.4±1.4   | 2.9±1.3  |
| <b>Occupation (<i>n</i>)</b>     |            |           |          |
| Cleaning                         | 3          | 5         | 8        |
| Housewife                        | 2          | 1         | 3        |
| Others                           | 1          | 2         | 3        |
| <b>Sex (<i>n</i>)</b>            |            |           |          |
| Male                             | 4          | 4         | 8        |
| Female                           | 2          | 4         | 6        |
| <b>Marital Status (<i>n</i>)</b> |            |           |          |
| Married                          | 4          | 5         | 9        |
| Unmarried                        | 2          | 2         | 4        |
| Divorced                         | 0          | 1         | 1        |
| <b>Family Type (<i>n</i>)</b>    |            |           |          |
| Extended                         | 4          | 6         | 10       |
| Nuclear                          | 2          | 2         | 4        |
| <b>Religion (<i>n</i>)</b>       |            |           |          |
| Hindu                            | 5          | 8         | 13       |

|                     |   |   |   |
|---------------------|---|---|---|
| Converted Christian | 1 | 0 | 1 |
|---------------------|---|---|---|

244 The majority of the participants were engaged in cleaning activities for Dhaka City Corporation  
 245 and private organisations, while the remainder were employed in household activities, as day  
 246 labourers, or in garment factories. More than half of the participants (10 out of 14) lived with  
 247 their extended family, and almost all (13 out of 14) were Hindu, with just one participant having  
 248 converted to Christianity.

249 Table 2 presents the key demographic characteristics of the FGD participants. Five FGDs were  
 250 conducted: (I) among 6 Agargoan Dalit men (mean age 28, SD  $\pm$  8 years), (II) among 7  
 251 Agargoan Dalit women (mean age 32, SD  $\pm$  7 years), (III) among 6 Ganaktuli Dalit men (mean  
 252 age 39, SD  $\pm$  7 years), (IV) among 8 female Ganaktuli Dalit women (mean age 24, SD  $\pm$  5  
 253 years) and (V) among 9 Ganaktuli Dalit men (mean age 35 ,SD  $\pm$  6 years).

254 **Table 2 Socio-demographic backgrounds of participants in the focus group discussions ( $n = 36$ )**

| Focus group discussion | Age of the participants in years (mean $\pm$ SD) | Location  | Number of Participants | Gender |
|------------------------|--------------------------------------------------|-----------|------------------------|--------|
| I                      | 28 $\pm$ 8                                       | Agargoan  | 6                      | Male   |
| II                     | 32 $\pm$ 7                                       | Agargoan  | 7                      | Female |
| III                    | 39 $\pm$ 7                                       | Ganaktuli | 6                      | Male   |
| IV                     | 24 $\pm$ 5                                       | Ganaktuli | 8                      | Female |
| V                      | 35 $\pm$ 6                                       | Ganaktuli | 9                      | Male   |

255  
 256 The dominant recurring themes were organised into categories reflecting the majority of  
 257 interactive elements of the ‘social determinants of health’ framework (i.e. socio-economic and  
 258 political context [including governance, macroeconomic policies, social and public policies,

1  
2  
3 259 culture and societal values untouchability, caste-based discrimination, and social exclusion]  
4  
5 260 socio-economic position and intermediary determinants).  
6  
7

## 8 9 261 **Space and Power**

10  
11 262 In an attempt to contextualise our findings within the wider socio-economic and political context,  
12  
13 263 this section starts by providing a brief overview of the political history of the Dalit population.  
14  
15 264 Accounts of the socio-political and economic dimensions of Dalit livelihoods helps in  
16  
17 265 understanding structural determinants of their health.  
18  
19

20  
21 266 In Bangladesh, the majority of untouchable Hindu Dalits are descended from Indian origins. In  
22  
23 267 Bangladesh, as in India and Nepal, untouchable Hindus belong to the lowest social position at  
24  
25 268 the base of the *Varna* system <sup>5</sup>. During the reign of the Mughals, Dhaka was established as the  
26  
27 269 commercial capital of the Bengal Subah by *Subahdar* (viceroy) Islam Khan in 1608. As the city  
28  
29 270 grew to become one of the wealthiest and most prosperous cities in the South Asian region, the  
30  
31 271 Mughal administrator appointed sweepers to maintain sanitation and cleaning activities <sup>4</sup>. In the  
32  
33 272 1620s there was a large-scale migration of Dalit from India to Dhaka, which was precipitated by  
34  
35 273 massacres by Burmese pirates in 1624-26: they were required to remove dead bodies from the  
36  
37 274 city <sup>7</sup>. It is commonly believed that a large number of Dalits were brought to the city by British  
38  
39 275 colonial administrators after Dhaka gained municipality status, to provide menial services <sup>7</sup>.  
40  
41 276 During the period of British colonial rule (1757-1947), Dalits (Telugu-speaking and Kanpuri  
42  
43 277 sweepers) were brought to East Bengal (now Bangladesh) from the Indian states of Uttar  
44  
45 278 Pradesh, Bihar, Andhra Pradesh and many other areas, including Bhagalpur, Motihari, Baliha,  
46  
47 279 Patna, Maddarapur, Uriya, Gourakpur and Chapra <sup>4,25</sup>. As the English administration rapidly  
48  
49  
50  
51  
52  
53  
54  
55  
56  
57  
58  
59



1  
2  
3 280 developed townships and local municipalities, these populations were moved to meet the  
4  
5 281 increasing need for sanitation workers.  
6  
7

8 282 The social position and status of Dalits are associated with their ancestral occupations, which  
9  
10 283 were regarded as impure. Dalits are mostly employed by public and private organisations for  
11  
12 284 sweeping activities, cleaning latrines, removing filth, skinning cattle, sweeping streets and  
13  
14 285 houses. Despite the lack of official data on the economic condition of Dalits, some secondary  
15  
16 286 sources claim that Dalits are engaged in low-paid manual work under severe discriminatory  
17  
18 287 terms <sup>25</sup>, and consequently earn much less than national average, with one source claiming that  
19  
20 288 their income lies between BDT 3000-5000 (considering BDT78=US\$1) while the national  
21  
22 289 average is BDT 7203 <sup>25</sup>. Processes of occupational discrimination and unfair payment contribute  
23  
24 290 to excluding the population from secure and safe dwellings. Dalit populations usually reside in  
25  
26 291 unhygienic environments characterised by poor quality, insufficient and irregular water,  
27  
28 292 electricity and gas provision. Overcrowded dwellings, narrow walkways, inadequate basic  
29  
30 293 facilities, such as toilets and water taps, represent significant everyday challenges that become  
31  
32 294 causes of further stigmatisation and marginalisation. Dalit populations often have to rely for  
33  
34 295 access to these services on middlemen and informal brokers, called *mastan* (local thugs); they  
35  
36 296 often rely on violence and illegal deals to negotiate access to resources. The interlacing of social  
37  
38 297 structures and political processes shape the Dalits' common everyday experiences of poverty and  
39  
40 298 constitute their shared identity.  
41  
42  
43  
44  
45  
46  
47

48 299 The material circumstances of the Dalit group in Dhaka city were identified as major  
49  
50 300 intermediary determinants of their health status. Data from all this study's sources (e.g. IDIs,  
51  
52 301 FGDs and KIIs) reported poor living conditions, their concentration in government-established  
53  
54 302 ghettos, or so-called 'colonies', and their highly unsafe housing characterised by poor drainage,  
55  
56  
57  
58  
59  
60

1  
2  
3 303 sanitation and water supply. Houses in government colonies had brick walls and corrugated iron  
4  
5 304 sheet roofs, while those in private slums were constructed from bamboo, tin, and wood. The  
6  
7  
8 305 sweeper ghettos were very overcrowded, with most respondents reporting that one small room  
9  
10 306 housed 6–10 family members spanning three generations. The environment was also highly  
11  
12 307 polluted, leading to extremely unsafe living conditions.

13  
14  
15 308 Sweeper ghettos also reported extremely unhygienic and inadequate sanitation conditions.  
16  
17 309 Bacteria, parasites, and disease vectors breed faster when sanitation and drainage systems are  
18  
19  
20 310 poor and when warmer and wetter conditions are prevalent all year round. Such poor living  
21  
22 311 conditions are likely to increase the incidence of vector-borne/water-borne diseases and  
23  
24 312 infections. For example, diarrhoea and respiratory infections, such as pneumonia, were  
25  
26  
27 313 commonly reported as the most frequent diseases among children aged less than five years old.  
28  
29 314 In addition, malaria, dengue fever, and *kala-azar* (visceral leishmaniasis) were reported to be  
30  
31 315 prevalent among all age groups.

32  
33  
34  
35 316 The wider socio-political context influences the effects of these material circumstances and has  
36  
37 317 multiple behavioural implications. The data collected from KIIs, IDIs and FDGs clearly indicates  
38  
39 318 that health policies largely ignore the specific needs of Dalits. For example, policies concerning  
40  
41  
42 319 housing, the labour market and land emerged as restricting factors for health. Over centuries,  
43  
44 320 Dalit populations have been allocated space in designated colonies, and Dalit families have  
45  
46 321 shared very small living spaces from generation to generation. Data from all the sources reflected  
47  
48 322 that, despite the potential for promoting basic housing facilities within the government owned  
49  
50 323 land, effective initiatives were never taken due to the lack of policy support. The respondents  
51  
52 324 related that government policy favoured congregating Dalits in such designated colonies, rather

1  
2  
3 325 than facilitating actions for housing supply and availability, and improving quality. One  
4  
5 326 participant reported:

8 327 *“Government policy has never allowed any action that facilitates housing facilities*  
9  
10 328 *for Dalit. They are living like this in colonies for generation; but, neither own nor*  
11  
12 329 *improve its quality.”* (A key informant in Ganaktuli)

16 330 Although the government has issued policy statements and strategies for the redistribution of  
17  
18 331 non-agriculture and agricultural *khas* land (government-owned fallow land) to landless people  
19  
20 332 since the early 1980s, Dalits have not been considered as a potential beneficiary group.  
21  
22 333 Therefore, the scope for improving health outcomes through facilitating housing conditions for  
23  
24 334 Dalits in allocated *khas* land is constrained by government land policy. One respondent stated:

28 335 *“Landlessness is the first and foremost problem that impacts overall wellbeing of*  
29  
30 336 *Dalit. Dalit living condition is out of description. But it can be improved through*  
31  
32 337 *distributing of khas land to Dalit as it is provided to landless people. But, it is a*  
33  
34 338 *matter of fact that Dalit cannot fill in the inclusion criteria set by the policy.”* (A key  
35  
36 339 informant in Agargoan)

40 340 Furthermore, the participants, especially the community leaders and NGO workers, believed that  
41  
42 341 the lack of government interventions restricted the potential for improving living conditions,  
43  
44 342 which also affected the health status of the population.

### 48 343 **Education and Labour**

51 344 An individual's place in a given society can be described by the concept of 'social position', as  
52  
53 345 proposed by Evans et al.<sup>26</sup>, which is generated and maintained under a broader social context.  
54  
55 346 The social position of an individual is dynamically created by a number of elements, such as

1  
2  
3 347 caste, religion or gender, which transmit intergenerational discriminations and inequalities.  
4  
5 348 Similar to what Evans et al. argue, when interviewing the participants we found that Dalits'  
6  
7 349 health can be seen as an outcome that is generated from social position, whereby an individual  
8  
9 350 and/or group are unable to fully participate in society because of their socio-cultural identity. The  
10  
11 351 socio-economic context has shaped Dalits' engagement with educational institutions; Dalits face  
12  
13 352 discrimination and are often deprived of education through various means. Our data found that  
14  
15 353 less than 30% of Dalits had received formal schooling, compared to more than 65% of the  
16  
17 354 national population. This figure tended to be even lower outside Dhaka city, as one respondent  
18  
19 355 reported:

20  
21  
22  
23  
24 356 *"In Dhaka city you will find higher number of Dalit who have schooling especially in*  
25  
26 357 *younger generation. But, the figure will drastically fall if you consider among the*  
27  
28 358 *whole number of Dalit across the country."* (A Dalit activist and key informant from  
29  
30 359 Ganaktuli)

31  
32  
33  
34 360 Respondents reported that their children faced discrimination by educational institutions, for  
35  
36 361 example being denied admission to private schools, rejection and teasing by teachers or students.  
37  
38 362 The school enrolment of Dalit girls was also decreased due to the practice of child marriage,  
39  
40 363 which subsequently affected sexual and reproductive health. The very low literacy rate among  
41  
42 364 Dalits resulted in little or no access to health information. One of the key informants said:

43  
44  
45  
46 365 *"Education is vital for improving health and general well-being. When an individual*  
47  
48 366 *lacks education, he/she eventually will be in a worse position to negotiate access to*  
49  
50 367 *services and information such as nutrition. Low literacy amongst the Dalit, in turn,*  
51  
52 368 *affects their health and overall well-being negatively."* (A key informant in  
53  
54 369 Ganaktuli)

1  
2  
3 370 The participants further reported that the low level of education nurtured significant information  
4  
5 371 asymmetries, which cause health-related misinformation, and limited occupational and income-  
6  
7 372 earning opportunities. Participants reported that, due to their being excluded from mainstream  
8  
9 373 society, Dalits were perceived to have poor levels of infant and child feeding, breastfeeding  
10  
11 374 practices, immunisation take-up, and personal and family hygiene, with an unhealthy  
12  
13 375 consumption of tobacco and alcohol, etc. One participant stated that:  
14  
15

16  
17 376 *“I have little or no educational background. It might diminish my understanding*  
18  
19 377 *whether and what extend things such as smoking bad for health? ...what and how*  
20  
21 378 *infant and young child should be fed? ...what are good practices for washing*  
22  
23 379 *hands.”* (A 56-year-old woman in Ganaktuli)  
24  
25  
26

27 380 The data also revealed that little and/or no education narrows the occupational opportunities, and  
28  
29 381 subsequently results in low incomes. In addition to poor educational quality, Dalit occupational  
30  
31 382 opportunities are determined by other factors such as caste-based identities and heredity, and  
32  
33 383 together with poor education this reduces their chance of improving their health status.  
34  
35  
36

37 384 The data analysis also showed how the wider structural determinants interact with and influence  
38  
39 385 the social positioning of Dalits and their material circumstances. We found that the labour  
40  
41 386 market both dynamically excludes and adversely includes Dalits by restricting their social and  
42  
43 387 occupational mobility. The data gathered from community participants and key informants  
44  
45 388 strongly suggests that Dalit ancestral occupations have limited their skill sets and continue to  
46  
47 389 force them to expose themselves to high health risks and to rely on very low wages.  
48  
49  
50  
51

52 390 Exposure to a toxic physical environment whilst at work was commonly reported in the  
53  
54 391 interviews and group discussions. Dalits are traditionally linked to their ancestral occupations,  
55  
56  
57  
58  
59

1  
2  
3 392 which were passed down from generation to generation. Consequently, the majority of Dalits are  
4  
5 393 engaged in sweeping and cleaning activities, manually handling waste material and garbage  
6  
7 394 whilst using no personal protective equipment. This exposes them to large amounts of dust, bio-  
8  
9  
10 395 aerosols, volatile organic matter, airborne particulates, bacteria, noise, and ergonomic stress.  
11  
12 396 Multiple participants reported that sweepers frequently experience infections. As one participant  
13  
14  
15 397 explained:

16  
17 398 *“Dalit always carry health risk with them at workplaces as they are dealing with*  
18  
19 399 *very serious issues such as dumping garbage or removing dirt. But, they do not use*  
20  
21 400 *protective equipment. [...] They are more likely than non-Dalit to experience*  
22  
23 401 *physical injuries or develop infections.”* (A 29-year-old cleaner in Agargoan)

24  
25  
26  
27 402 Similarly, another participant noted:

28  
29  
30 403 *“Dalit sweepers don’t take any dust protective measure; therefore, they inhale it... I*  
31  
32 404 *witnessed my colleagues develop respiratory infections and other airborne*  
33  
34 405 *diseases.”* (A street sweeper in Ganaktuli)

35  
36  
37  
38 406 Nonetheless, Dalit participants were not inclined to look for alternative occupations, as they said  
39  
40 407 there was no scope for them to work outside of these historical, marginalised social spaces.  
41  
42 408 Participants were highly aware of their role in the history of the country, and explained that they  
43  
44 409 would face significant resistance if they tried to access occupations that did not conform to their  
45  
46 410 low social and political status. Occupation-based discrimination, lingering poverty, and social  
47  
48 411 stigmatisation reduced their opportunities to participate in the labour market on equal terms (in  
49  
50 412 relation to non-Dalits) and to engage with activities that were not considered ‘impure’. One FGD  
51  
52  
53  
54  
55  
56  
57  
58  
59  
60

1  
2  
3 413 participant talked about how the lack of skills combined with long-established social norms  
4  
5 414 strongly discourage Dalits from engaging differently with the labour market:  
6  
7

8 415 *“We are traditionally engaged in sweeping, as my ancestors did. I have no other skill*  
9  
10 416 *except this. How can I do [anything else], for example, pulling a rickshaw or running*  
11  
12 417 *a business? Similarly, people will not come and take a cup of tea if I operate a tea*  
13  
14 418 *stall.”* (A 37 year old cleaner in Agargoan)  
15  
16  
17

18 419 This particular barrier is becoming increasingly problematic, as over 70% of the respondents  
19  
20 420 reported that their access to sweeping jobs had become highly insecure and precarious; although  
21  
22 421 initially the nature of their recruitment in sweeping activities was permanent, Dalits had more  
23  
24 422 recently had to compete for their occupation with non-traditional Muslim sweepers. Although the  
25  
26 423 city corporation’s sweeper recruitment policy states that the Dalit are given a quota, the  
27  
28 424 authorities have not adhered to this system in recent years. The frequent recruitment of non-  
29  
30 425 traditional sweepers by different government and non-government organisations has  
31  
32 426 considerably narrowed Dalits’ employment options, leading to financial hardship:  
33  
34  
35  
36

37 427 *“Some proportion of sweeping is reserved in government offices. However, non-Dalit*  
38  
39 428 *sweepers are getting these jobs through bribes to political leaders and government*  
40  
41 429 *officials. Where will we go for work? We will likely have to resort to unsocial and*  
42  
43 430 *illegal activities to survive if this situation is not improved.”* (A housewife in  
44  
45 431 Agargoan)  
46  
47  
48

49 432 The lack of a sufficient and regular income limited Dalit participants’ capacity to afford basic  
50  
51 433 necessities, including food, healthcare (particularly from private facilities), and education fees.  
52  
53 434 Their average monthly household income ranged from BDT 5850 to 8970 (considering  
54  
55  
56  
57  
58  
59  
60

1  
2  
3 435 BDT78=US\$1), which was insufficient to buy three nutritious meals per day for an extended  
4  
5 436 family.

### 9 437 **Politics and Relationships**

10  
11 438 Our data has identified a set of social and political factors in the given political and governance  
12  
13 439 system that impact upon the Dalit health status through stratifying individual positions on the  
14  
15 440 basis of hierarchies of power and prestige, and access to resources. Due to their weak socio-  
16  
17 441 economic position, caste-based identity and discrimination, Dalits in the studied areas generally  
18  
19 442 have a weak power of participation in political processes, both at the national and community  
20  
21 443 level. One of the participants from Ganaktuli reported:

22  
23 444 *“Our sweeping identity shapes our world – our work, our rights, our opportunities,*  
24  
25 445 *our limitations, it shapes everything. Hundreds of years we are living a confined life*  
26  
27 446 *in a sense that the mainstream society maintains a greater distance as we belong to*  
28  
29 447 *such a low caste. Where are we? ...In education, in health, in politics? ...nowhere.”*

30  
31 448 (add details)

32  
33 449 The lack of political participation generated by a lack of consideration and discrimination by  
34  
35 450 other powerful groups limited Dalits’ opportunity to voice their needs and impeded their capacity  
36  
37 451 to exercise other constitutional and human rights. Making a direct connection between political  
38  
39 452 engagement and health, one participant voiced:

40  
41 453 *“To my knowledge, no one from the Dalit community has appeared as a candidate in*  
42  
43 454 *any election at national or community level. Even, they are likely to be less*  
44  
45 455 *concerned about this. Such an absence in political process diminishes our capacity*  
46  
47 456 *to protect communal interest concerning health.”* (A 34-year-old Dalit in Agargoan)



1  
2  
3 457 Data from interviews with key informants and group discussants indicated that factors relating to  
4  
5 458 macroeconomic policies influenced the health of Dalits. Macro level policies were considered to  
6  
7  
8 459 be having a negative impact on their health status and health seeking capacity, and public  
9  
10 460 allocations for social protection and healthcare schemes continued to exclude people living in  
11  
12 461 urban settings. One of the key informants reflected on the situation:

14  
15 462 *“Government policy only provides safety-net support for poor in the rural setting.*  
16  
17 463 *However, the Dalit are concentrated on the metropolitans and small township.*  
18  
19  
20 464 *...therefore are not eligible for that.”* (A key informant in Agargoan)

21  
22  
23 465 This policy significantly affected Dalits’ capacity to seek and afford treatment in settings where  
24  
25 466 they were exposed to regular health shocks and hazards. For example, in the existing health  
26  
27 467 policy, two-thirds of healthcare costs are financed via an out-of-pocket mechanism <sup>27</sup>, and the  
28  
29 468 urban poor experience limited or no healthcare support. Participants reported that having no  
30  
31 469 social protection schemes meant that they had to rely on considerable out-of-pocket healthcare  
32  
33 470 expenditure in order to access healthcare from both public and private facilities. The low  
34  
35 471 income-earning capacity of Dalits interacted directly with their individual socio-economic  
36  
37 472 condition, particularly for those suffering from chronic health conditions that required prolonged  
38  
39 473 and continuous care and medication. The inability to afford treatment was frequently reported as  
40  
41 474 an important barrier to better health by respondents suffering from cardiac issues, diabetes and  
42  
43  
44 475 renal disease due to out-of-pocket costs. One of them said:

46  
47  
48 476 *“I have been suffering from diabetes for the past years. The doctor prescribed*  
49  
50 477 *several drugs that I imperatively need to continue taking to control my sugar levels. I*  
51  
52 478 *cannot afford such drug for rest of my life [...] you will never expect to get diabetic*  
53  
54 479 *drug free of cost.”* (A street sweeper in Ganaktuli)

1  
2  
3 480 Some participants highlighted the heavy reliance on expensive private health service providers as  
4  
5 481 a significant determinant of bad health. They indicated that an individual's health status tended  
6  
7 482 to deteriorate when they needed to access healthcare services from a local private institution. A  
8  
9 483 key informant in Ganaktuli explained that local private healthcare facilities generally tended to  
10  
11 484 be better equipped than local government facilities, and increasingly played a 'vital role in  
12  
13 485 healthcare services delivery.' However, he noted:

14  
15  
16  
17 486 *"If the problem is not mil and, you must seek consultant at private facilities this*  
18  
19 487 *involves huge expenses that are most likely beyond the capacity of Dalit. ...I found*  
20  
21 488 *few individual who have been suffering from chronic disease but fail to take care*  
22  
23 489 *from private clinic due to the cost incurred."* (A key informant in Ganaktuli)

24  
25  
26  
27 490 Beyond the costs incurred by care, participants also identified the behaviour of healthcare  
28  
29 491 professionals in public and private facilities as barriers to their accessing better health.  
30  
31 492 Respondents shared experiences of entrenched stigmatisation and discrimination that hampered  
32  
33 493 their willingness and motivation to see a doctor, thereby generating a process of self-exclusion  
34  
35 494 from these facilities.

36  
37  
38  
39 495 The social positioning of the Dalit identity generates considerable caste-based discrimination,  
40  
41 496 enhancing exclusion, broadening inequalities, and restricting them from accessing healthcare.  
42  
43 497 Dalit people, considered untouchable due to their traditional employment that brings them into  
44  
45 498 contact with human excreta, dirt, garbage, bad odours, dead bodies, and other elements, are  
46  
47 499 defined by others by their impurity. One participant described how mainstream society perceives  
48  
49 500 the Dalit, and the following quote denotes how societal perceptions have been internalised by  
50  
51 501 Dalits themselves:

1  
2  
3 502 *“We are methar [a Bangla colloquial term signifying degradation, disgust], nothing*  
4  
5 503 *more than that. Our position can be nowhere else but at the bottom of the society.”*

6  
7  
8 504 (A 34-year-old scavenger in Agargoan)

9  
10  
11 505 These socio-economic mechanisms and Dalits’ relational social positioning interact with other  
12  
13 506 factors to create psychosocial factors which determine their health status. Due to social  
14  
15 507 discrimination and exclusion, Dalit often lose their self-worth and experience depression and  
16  
17 508 shame. Such feelings in turn lead to social isolation and further narrow individual and/or  
18  
19 509 community participation in health programmes. The participants further stated that Dalits could  
20  
21 510 not fully participate in community-based health programmes focusing on child and maternal  
22  
23 511 health, the promotion of nutrition, immunisation, sanitation and hygiene. One participant  
24  
25 512 explained the situation as follows:

26  
27  
28  
29  
30 513 *“Dalit are social excluded and discriminated in many ways. Due to such*  
31  
32 514 *discrimination and exclusion, they might lose self-esteem to be open-minded in*  
33  
34 515 *participation of community-led health programmes.”* (A 34-year-old cleaner in  
35  
36 516 Agargoan)

37  
38  
39  
40 517 Stigmatising behaviours and discriminatory attitudes against the Dalits are also reproduced by  
41  
42 518 healthcare workers. Most respondents reported that healthcare workers were more likely to  
43  
44 519 consider their health problems to be less serious than those of non-Dalits in order to limit the  
45  
46 520 amount of time spent with them and their exposure to ‘impurity’. In small townships and  
47  
48 521 localities outside Dhaka city, for example in primary level healthcare facilities where Dalits are  
49  
50 522 easily identified by locals, they reported being more likely to face such discriminatory attitudes  
51  
52 523 from healthcare workers. Multiple participants echoed the following experience of visiting a  
53  
54 524 health facility:

1  
2  
3 525 *“Sometimes we do not disclose our identity to avoid neglect and unpleasant*  
4  
5 526 *situation. ... I can tell you a tragic story about the hospital admission of a Dalit*  
6  
7 527 *woman. She was denied to get hospital admission and was kept laying on the floor of*  
8  
9 528 *the balcony as being a Dalit. Meanwhile, she developed additional problems —*  
10  
11 529 *common cold, fever and breathing difficulties in such a cold weather. Later, we put*  
12  
13 530 *the issue forward and the hospital authority admitted her and provided a bed.” (A*  
14  
15 531 *51-year-old Dalit rights activist in Ganaktuli)*

16  
17  
18  
19  
20 532 Several participants described a lack of attention from healthcare workers, and difficulties in  
21  
22 533 obtaining adequate information regarding their health problems and required treatments. The  
23  
24 534 following excerpt reflects this situation:

25  
26  
27 535 *“Doctors/nurses are unwilling to discuss details regarding any health information or*  
28  
29 536 *health intervention in the facilities. They just provide minimal medicine and maintain*  
30  
31 537 *indifference when asked about a health-related problem.” (A 55-year-old leather*  
32  
33 538 *worker in Ganaktuli)*

34  
35  
36  
37 539 Such negligent and discriminatory behaviour on the part of healthcare providers made Dalits  
38  
39 540 hesitant to participate in health promotion activities to enhance their own health, and even  
40  
41 541 influenced their decisions to delay seeking treatment for infectious diseases. One of the key  
42  
43 542 informants explained how the socio-political position of the Dalit community impacted upon the  
44  
45 543 care-seeking behaviour of Dalits:

46  
47  
48  
49 544 *“The Dalit live as a minority within the mainstream. All aspects of their lives – such*  
50  
51 545 *as profession, access to services, rights and obligations, decisions, and so on – are*

1  
2  
3 546 *determined and ascribed by these social and political contexts.”* (A NGO worker in  
4  
5 547 Ganaktuli)

8 548 Denied access to formal and informal safety nets, this marginalisation is reinforced by  
9  
10 549 idiosyncratic forms of discrimination based on class, gender, physical ability and age in  
11  
12 550 particular. Under-nutrition of low-income (often extreme poor) adolescent girls, pregnant  
13  
14 551 mothers and elderly widows was found to be particularly severe. Health inequalities experienced  
15  
16 552 by Dalits were also influenced by the manner in which policies are developed and translated into  
17  
18 553 practice. One key informant stated:

21  
22  
23 554 *“The state did not consider that context-specific healthcare provision might be*  
24  
25 555 *effective for providing services to this kind of disadvantaged group of people. We*  
26  
27 556 *need the formulation of policies that cover the delivery of health services to the Dalit*  
28  
29 557 *and other groups of people who are in an unfavourable position to seek care.”* (A  
30  
31 558 Dalit rights activist in Agargoan)

34  
35 559 In addition, some respondents reported that the impact of Dalits’ social positioning generated  
36  
37 560 biological factors that negatively affected their health. Many respondents claimed that male  
38  
39 561 Dalits were likely to consume high quantities of low-quality alcohol and tobacco, noting that this  
40  
41 562 behaviour can be explained by the difficult occupations and psycho-social pressure they  
42  
43 563 experienced. Exposure to bad odours, dirt and dead organisms can induce vomiting and appetite  
44  
45 564 loss, and according to some respondents consuming alcohol and cigarettes mitigated the negative  
46  
47 565 psychological and physical effects of this type of work. Historically, Dalits have been  
48  
49 566 characterised by such depictions and so this is not new; it is beyond the scope of this research to  
50  
51 567 assess the veracity of such claims. However, what is noteworthy is how such claims serve to  
52  
53 568 further stigmatise members of this population group, who according to some respondents, are

1  
2  
3 569 *“habituated to consume alcohol and tobacco products”* as they believe it is *“a habit rooted in*  
4  
5 570 *their occupational roles and psychosocial identity”* (A 23-year-old scavenger in Agargoan). Our  
6  
7 571 data suggests that Dalit children living in marginalised settlements suffer from stigmatisation and  
8  
9 572 are therefore constrained in their physical mobility and social interactions. Although it was not  
10  
11 573 possible to measure the physical growth of children due to the nature of this study, participants  
12  
13 574 reported that children, particularly those aged under 5 years, were likely to be undernourished.  
14  
15 575 Poverty, low health information and awareness, and physical environment were reported as the  
16  
17 576 most likely causal factors for such poor physical and social development of young children.  
18  
19  
20  
21

22 577 As a response to the hostile wider socio-political context and challenging material circumstances,  
23  
24 578 traditional health practices and rituals are widely practised within the Dalit community.  
25  
26 579 Religious beliefs and spirituality influence their health status and attitudes towards seeking  
27  
28 580 treatment. It was found that low-income Dalits adhering to strict religious beliefs were more  
29  
30 581 likely to rely on faith-based healing for sexual and reproductive health, pregnancy care, and  
31  
32 582 infant and child feeding practices.  
33  
34  
35  
36

## 37 583 **DISCUSSION**

38  
39  
40  
41 584 To the best of our knowledge this is the first study aimed at understanding the socio-cultural and  
42  
43 585 economic determinants of health inequalities in the Dalit population in Bangladesh, and it applies  
44  
45 586 the CSDH Conceptual Framework developed by the WHO. Our analysis suggested that the  
46  
47 587 mechanisms of social and economic discrimination that result in severe health inequalities for  
48  
49 588 Dalits are supported and reinforced by an array of interconnected structural factors, including  
50  
51 589 geographic marginalisation, poor living conditions, low formal education, little political  
52  
53 590 representation, poor access to resources, limited labour market engagement, and stigmatisation.  
54  
55  
56  
57  
58  
59

1  
2  
3 591 Stigmatisation was found to be pervasive, and to directly shape relational and material  
4  
5 592 determinants of health.  
6  
7

8  
9 593 Dalits' occupation-based identity determines their ability to interact with non-Dalits and with the  
10  
11 594 state, and their stigmatisation as an impure, unhygienic, uneducated population group reinforces  
12  
13 595 these processes and worsens their material and psychosocial circumstances. These are identified  
14  
15 596 as significant intermediary determinants of their health status within this specific urban context  
16  
17 597 <sup>28</sup>. Our findings confirm that health inequalities are rooted in the social process, whereby  
18  
19 598 structural, contextual, and interpersonal factors intersect and influence each other <sup>29-31</sup> and build  
20  
21 599 on these to show how pervasive identity-based discrimination perpetuates the causes and effects  
22  
23 600 of health inequalities.  
24  
25  
26  
27

28 601 Untouchability and caste-based discrimination perpetuate an exclusionary process that results in  
29  
30 602 this population belonging to a lower caste status with limited or no access to or participation in  
31  
32 603 healthcare services or health seeking behaviours, and has been similarly noted by studies  
33  
34 604 conducted in Indian societies <sup>32-36</sup>. Broadly, these socio-culturally constructed exclusionary  
35  
36 605 processes restrict Dalits' economic, political, social and cultural participation, which in turn  
37  
38 606 negatively impacts upon their health and well-being at the individual, communal, regional, and  
39  
40 607 global levels. These observations are also in line with a prior report of the Social Exclusion  
41  
42 608 Knowledge Network (SEKN) to the World Health Commission on Social Determinants of  
43  
44 609 Health, which stated that sociocultural exclusion is a dynamic and multi-dimensional process  
45  
46 610 driven by unequal power relations <sup>30;33;37</sup>.  
47  
48  
49  
50

51  
52 611 Our results also highlight power differentials between Dalit individuals and healthcare  
53  
54 612 professionals, which enhance health inequities and further victimise Dalits, and are in line with  
55  
56  
57  
58  
59

1  
2  
3 613 the results of another study in India <sup>38</sup>. These power differentials further repress the social,  
4  
5 614 political, and economic participation of Dalits, leading to the unequal and unjust distribution of  
6  
7  
8 615 resources and access to services. Overall, sociocultural exclusionary processes generate,  
9  
10 616 preserve, and reproduce inequalities regarding participating in, accessing, and utilising health  
11  
12 617 services, which perpetuate intergenerational deprivation and discrimination. Other studies have  
13  
14  
15 618 demonstrated that caste-based exclusion, deprivation, and discrimination have been practised on  
16  
17 619 the Indian subcontinent for thousands of years <sup>4,38</sup>.

20 620 The socio-economic and political context, together with macro-policies, facilitate the  
21  
22 621 exclusionary process whereby Dalit people have limited opportunities for livelihood  
23  
24  
25 622 development and to improve their economic condition, consequently reducing their income  
26  
27 623 opportunities and trapping them in poverty. In many cases this trap is sustained and enhanced  
28  
29 624 through intergenerational transmission. Income is strongly associated with health and influences  
30  
31  
32 625 a range of material circumstances that directly impact health. Economic exclusion also  
33  
34 626 determines access to and utilisation of health services, while economic marginalisation appears  
35  
36 627 to limit the provision of healthcare, health-seeking behaviours, and access to other basic services  
37  
38 628 provided by members of society and the state <sup>26,39</sup>. In addition, social and public policies narrow  
39  
40  
41 629 healthcare utilisation and healthcare-seeking, e.g. catastrophic out-of-pocket costs and the  
42  
43 630 shrunken delivery of healthcare by public health facilities. The literature shows that over the  
44  
45 631 recent years out-of-pocket costs are gradually increasing due to the steady expansion of private  
46  
47 632 healthcare services <sup>27,40</sup> and this affects healthcare seeking and utilisation. The wider structural  
48  
49  
50 633 factors facilitate the Dalits' compromised material circumstances, unhealthy lifestyle, and social  
51  
52 634 isolation. As noted by other studies <sup>41-43</sup>, our findings show that poor living and working  
53  
54  
55 635 conditions, limited healthcare access and support, poor state of water and sanitation, habit of



1  
2  
3 636 tobacco consumption, stress, and isolation from health services, negatively impact upon health  
4  
5 637 status and healthcare seeking. A lower social background was observed by Dubey <sup>44</sup> to  
6  
7 638 contribute to weakening social networks that perpetuate poor healthcare access and healthcare  
8  
9 639 seeking. Furthermore, the health system itself influences the health of Dalits as it presents Dalits  
10  
11 640 with greater financial costs when accessing or seeking healthcare, as noted other studies <sup>27;45</sup>.  
12  
13 641 Moreover, access to and acceptance by healthcare providers is determined by the social position  
14  
15 642 of individuals and groups; Dalits' low social position restricts their access to healthcare  
16  
17 643 professionals, as had been previously reported in many regions across the world <sup>42;46;47</sup>. Our  
18  
19 644 findings suggest that the health status of the Dalit community is not shaped solely by clinical  
20  
21 645 issues but also by a range of sociocultural determinants, as proposed in several other studies <sup>48;49</sup>.  
22  
23 646 For disadvantaged, marginalised, and socio-culturally excluded individuals or groups like Dalits,  
24  
25 647 health outcome improvement is closely linked to public policies and actions that address socio-  
26  
27 648 cultural determinants of health inequities, with the government playing a central role <sup>50</sup>.

### 649 **LIMITATIONS OF THE STUDY**

650 The results of this study are based on data collected from the Dalit population in Dhaka City;  
651 therefore, the results may not be transferable to other settings, for example a small Bangladeshi  
652 town. Nonetheless, considering the data collected, we believe that this study provides an in-depth  
653 understanding of a set of social, cultural, economic and political factors that strongly determine  
654 the health outcomes of Dalits.

### 655 **CONCLUSIONS AND IMPLICATION FOR THE STUDY**

656 Although this subject has previously been sporadically discussed in newspaper reports, NGO  
657 reports and media reports, this paper is one of the first qualitative studies to explore a vast array

1  
2  
3 658 of factors that determine health inequalities in urban Dalit populations in Bangladesh. This study  
4  
5 659 is expected to contribute to knowledge by investigating how these elements interact and play a  
6  
7 660 determining role in shaping Dalits' health status. This study supports the view that Dalit health  
8  
9 661 inequalities are largely affected by a wide range of socio-cultural factors which can be observed  
10  
11 662 in societies across many regions of South Asia.  
12  
13  
14

15 663 Importantly, we argue for the need to recognise the significant intermediary effects of everyday  
16  
17 664 discrimination and stigmatisation, perpetuated by socio-economic structures, on educational  
18  
19 665 achievement, political participation, occupations and health behaviours. Dalits' social and  
20  
21 666 political history shapes their social position in society today by limiting their power relative to  
22  
23 667 non-Dalits in key social structures, including the labour market and health institutions. These  
24  
25 668 mechanisms enhance exclusionary processes through mutually reinforcing sets of socio-cultural  
26  
27 669 and economic dynamics, and these generate, sustain, deepen, reinforce and reproduce  
28  
29 670 inequalities in the health of Dalit populations. Therefore, it is unlikely that the health status of  
30  
31 671 Dalit populations will be improved through the better clinical performance of existing healthcare  
32  
33 672 providers alone. Recognition of the hostility of existing institutions and addressing entrenched  
34  
35 673 exclusionary processes (including self-exclusion) and adverse inclusion is needed, together with  
36  
37 674 research on the potential benefits of developing state-initiated social protection schemes focusing  
38  
39 675 on deepening the social inclusion agenda.  
40  
41  
42  
43  
44  
45

46 676  
47  
48  
49

50 677  
51  
52  
53

54 678  
55  
56  
57  
58  
59  
60

## 679 **Abbreviations**

680 BDT: Bangladesh Taka; CSDH: Commission on Social Determinants of Health; FGD: Focus  
681 Group Discussions; IDI: In-depth Interviews; KII: Key Informant Interviews; NGO: Non-  
682 governmental Organisations; PWD: Public Works Department; SEKN: Social Exclusion  
683 Knowledge Network; WHO: World Health Organization; USD: United State Dollar;

## 684 **Acknowledgements**

685 The authors would like to extend their gratitude to the Department of Anthropology, Dhaka  
686 University for their approval of this study. The authors are also grateful to the members of the  
687 two Dalit communities, and NGO workers who participated in the interviews and group  
688 discussions.

## 689 **Funding**

690 This study received no funding from any sources.

## 691 **Availability of data and materials**

692 As we informed the participants during the consent process that data would only be shared  
693 within the research team, then the data cannot be made available publicly. However, we shared  
694 the interview and discussion guidelines under ‘additional supporting files.’ Interested parties may  
695 contact Mr. Md. Shahin Chowdhury (anthro.du@yahoo.com), Senior Administrative Assistant,  
696 Department of Anthropology, Dhaka University, for further inquiries in this regard.

1  
2  
3 697 **Author contributions**  
4  
5

6  
7 698 AK ([ashraful262@yahoo.com](mailto:ashraful262@yahoo.com)) conceptualized the study, participated in data collection and  
8  
9 699 analysis, and prepared the first draft of the manuscript. MRLM ([mathilde.maitrot@hotmail.fr](mailto:mathilde.maitrot@hotmail.fr))  
10  
11 700 reviewed and edited manuscript. AA ([israabd@gmail.com](mailto:israabd@gmail.com)) guided the data collection and  
12  
13  
14 701 analysis. All authors read and approved the final version of the manuscript.  
15

16  
17 702 **Competing Interest**  
18  
19

20  
21 703 The authors declare that they have no conflicts of interest.  
22  
23

24 704 **Consent for publication**  
25  
26

27 705 Participants provided consent to publish their quotes anonymously or using pseudonyms.  
28  
29

30 706  
31  
32  
33  
34  
35  
36  
37  
38  
39  
40  
41  
42  
43  
44  
45  
46  
47  
48  
49  
50  
51  
52  
53  
54  
55  
56  
57  
58  
59  
60

## 707 Reference List

708

- 709 (1) El AS, Christou A, Reichenbach L, Osman FA, Azad K, Islam KS et al. Community-based  
710 approaches and partnerships: innovations in health-service delivery in Bangladesh. *Lancet* 2013;  
711 382(9909):2012-2026.
- 712 (2) Chowdhury AM, Bhuiya A, Chowdhury ME, Rasheed S, Hussain Z, Chen LC. The Bangladesh  
713 paradox: exceptional health achievement despite economic poverty. *Lancet* 2013;  
714 382(9906):1734-1745.
- 715 (3) MOHFP GoB. Health population and nutrition sector strategic plan (HPNSSP) : 2011-2016. 3rd  
716 ed. Dhaka: Planning Wing, Ministry of Health and Family Welfare, Government of the People's  
717 Republic of Bangladesh; 2010.
- 718 (4) Asaduzzaman A. The "Pariah" people: an ethnography of the urban sweepers in Bangladesh. The  
719 University Press; 2001.
- 720 (5) Sultana H, Subedi DB. caste system and resistance: the case of untouchable hindu sweepers in  
721 Bangladesh. *Int J Polit Cult Soc* 2015;1-14.
- 722 (6) International Dalit Solidarity Network (IDSN). Working globally against discrimination based on  
723 work and descent. Copenhagen: IDSN; 2013. 1-51.
- 724 (7) Islam F. political participation of Dalit women in Dhaka city, Bangladesh. Dhaka: 2007.
- 725 (8) The Life and Days of (Dalit) Sweepers in Bangladesh. The Daily Star 2006.
- 726 (9) Lundberg O. Causal explanation for class inequality in health - An empirical analysis. *Social Science  
727 & Medicine* 1991; 32(4):385-393.
- 728 (10) Davidson R, Mitchell R, Hunt K. Location, location, location: the role of experience of  
729 disadvantage in lay perceptions of area inequalities in health. *Health Place* 2008; 14(2):167-181.
- 730 (11) Gwatkin DR, Bhuiya A, Victora CG. Making health systems more equitable. *Lancet* 2004;  
731 364(9441):1273-1280.
- 732 (12) Graham H. Social determinants and their unequal distribution:Clarifying policy understanding.  
733 *The Maibank Quarterly* 2004; 82(1):101-124.
- 734 (13) Davidson R, Kitzinger J, Hunt K. The wealthy get healthy, the poor get poorly? Lay perceptions of  
735 health inequalities. *Soc Sci Med* 2006; 62(9):2171-2182.
- 736 (14) Ahmed SM, Adams AM, Chowdhury M, Bhuiya A. Gender, socioeconomic development and  
737 health-seeking behaviour in Bangladesh. *Soc Sci Med* 2000; 51(3):361-371.

- 1  
2  
3 738 (15) Solar O, Irwin A. A conceptual framework for action on the social determinants of health: Social  
4 739 Determinants of Health Discussion Paper 2 (Policy and Practice). Geneva Switzerland World  
5 740 Health Organization [WHO] 2010.; 2007.
- 7 741 (16) Krieger N. Theories for social epidemiology in the 21st century: an ecosocial perspective. *Int J*  
8 742 *Epidemiol* 2001; 30(4):668-677.
- 10 743 (17) Marmot M, Wilkinson RG. Psychosocial and material pathways in the relation between income  
12 744 and health: a response to Lynch et al. *BMJ* 2001; 322(7296):1233-1236.
- 14 745 (18) Smith GD, Egger M. Commentary: understanding it all--health, meta-theories, and mortality  
15 746 trends. *BMJ* 1996; 313(7072):1584-1585.
- 17 747 (19) Wilkinson RG, Pickett KE. Income inequality and population health: a review and explanation of  
18 748 the evidence. *Soc Sci Med* 2006; 62(7):1768-1784.
- 20 749 (20) Anderson C. Presenting and evaluating qualitative research. *Am J Pharm Educ* 2010; 74(8):141.
- 22 750 (21) Patton MQ. *Qualitative Research and Evaluation Methods* , 209-339. Thousand Oaks, CA: Sage.  
23 751 *Un estudio cualitativo*; 2002.
- 25 752 (22) Guest G, Bunce A, Johnson L. How many interviews are enough? An experiment with data  
26 753 saturation and variability. *Field Methods* 2006; 18(1):59-82.
- 28 754 (23) Abbas T, Charles T. *Handbook of mixed methods in social & behavioral research*. Sage  
29 755 Publications, Thousand Oaks; 2003.
- 31 756 (24) Miles MB, Huberman AM. *Qualitative data analysis: A sourcebook*. *Beverly Hills: Sage*  
32 757 *Publications* 1994.
- 34 758 (25) Chowdhury IU. *Caste-based Discrimination in South Asia: A Study of Bangladesh*. New Delhi:  
35 759 Indian Institute of Dalit Studies; 2009.
- 37 760 (26) Evans T, Whitehead M, Diderichsen F, Bhuiya A, Wirth M. *Challenging Inequities in Health : From*  
38 761 *Ethics to Action*. *Oxford UP* 2001.
- 40 762 (27) Islam A, Biswas T. Health system in Bangladesh: Challenges and opportunities. *American Journal*  
41 763 *of Health Research* 2014; 2(6):366-374.
- 43 764 (28) Hankivsky O. *Intersectionality 101*. The Institute for Intersectionality Research & Policy, SFU;  
44 765 2014.
- 46 766 (29) Cairney J, Veldhuizen S, Vigod S, Streiner DL, Wade TJ, Kurdyak P. Exploring the social  
47 767 determinants of mental health service use using intersectionality theory and CART analysis. *J*  
48 768 *Epidemiol Community Health* 2014; 68(2):145-150.
- 50 769 (30) Patil RR. Caste-, work-, and descent-based discrimination as a determinant of health in social  
51 770 epidemiology. *Soc Work Public Health* 2014; 29(4):342-349.

- 1  
2  
3 771 (31) Seng JS, Lopez WD, Sperlich M, Hamama L, Reed Meldrum CD. Marginalized identities,  
4 772 discrimination burden, and mental health: empirical exploration of an interpersonal-level  
5 773 approach to modeling intersectionality. *Soc Sci Med* 2012; 75(12):2437-2445.  
6  
7 774 (32) Mohindra KS, Haddad S, Narayana D. Women's health in a rural community in Kerala, India: do  
8 775 caste and socioeconomic position matter? *J Epidemiol Community Health* 2006; 60(12):1020-  
9 776 1026.  
10  
11 777 (33) Nayar KR. Social exclusion, caste & health: a review based on the social determinants  
12 778 framework. *Indian J Med Res* 2007; 126(4):355-363.  
13  
14 779 (34) Agarwal S, Srivastava A. Social determinants of children's health in urban areas in India. *J Health*  
15 780 *Care Poor Underserved* 2009; 20(4 Suppl):68-89.  
16  
17 781 (35) Vart P, Jaglan A, Shafique K. Caste-based social inequalities and childhood anemia in India:  
18 782 results from the National Family Health Survey (NFHS) 2005-2006. *BMC Public Health* 2015;  
19 783 15:537.  
20  
21 784 (36) Baral SC, Karki DK, Newell JN. Causes of stigma and discrimination associated with tuberculosis  
22 785 in Nepal: a qualitative study. *BMC Public Health* 2007; 7:211.  
23  
24 786 (37) Kurian NJ. Widening economic & social disparities: implications for India. *Indian J Med Res* 2007;  
25 787 126(4):374-380.  
26  
27 788 (38) Sabharwal SN, Sharma S, Diwakar G D, Naik AK. Caste discrimination as a factor in poor access to  
28 789 public health service system: a case study of janani suraksha yojana scheme. *Journal of Social*  
29 790 *Inclusion Studies* 2014; 1(1):148-168.  
30  
31 791 (39) WHO. A Conceptual Framework for Action on the Social Determinants of Health: Discussion  
32 792 paper for the Commission on Social Determinants of Health: DRAFT. 2007.  
33  
34 793 (40) Soor W, Man D, Ndiaye P, Dkhimi F, van de Pas R, Criel B. Towards universal coverage in the  
35 794 majority world: Transversal findings & lessons learnt, a summary. Antwerp, Belgium: ITG; 2015.  
36  
37 795 (41) Kumar Saha C. Dynamics of Risk Determinants Regarding Diarrhea Affected Slum Children in  
38 796 Urban Dhaka: A Dysfunctional Health Care System. *Current Research Journal of Social Sciences*  
39 797 2012; 4:304-313.  
40  
41 798 (42) Kabir A, Farhana N, Akter F, Jesmin S, Ali A. Sweeping practices, perceptions and knowledge  
42 799 about occupational safety and health hazards of street sweepers in Dhaka city, Bangladesh: a  
43 800 qualitative inquiry. *Int J Community Med Public Health* 2015; 2(3):237-243.  
44  
45 801 (43) Bamba C, Gibson M, Sowden A, Wright K, Whitehead M, Petticrew M. Tackling the wider social  
46 802 determinants of health and health inequalities: evidence from systematic reviews. *J Epidemiol*  
47 803 *Community Health* 2010; 64(4):284-291.  
48  
49 804 (44) Desai S, Dubey A. Caste in 21st Century India: Competing Narratives. *Econ Polit Wkly* 2012;  
50 805 46(11):40-49.  
51  
52  
53  
54  
55  
56  
57  
58  
59  
60

- 1  
2  
3 806 (45) Health System of Bangladesh. Online resource [ 2014 [cited 2014 May 23]; Available from:  
4 807 URL:<http://www.bangladesh.gov.bd/?q=en/health-care-systems-bangladesh>  
5  
6 808 (46) Wilkinson RG. Socioeconomic determinants of health. Health inequalities: relative or absolute  
7 809 material standards? *BMJ* 1997; 314(7080):591-595.  
8  
9 810 (47) Borooah VK. Inequality in health outcomes in India: The role of caste and religion. 2010.  
10  
11 811 (48) Sen G, Iyar A, George A. Systematic hierarchies and Systemic failures: Gender and Health  
12 812 Inequities in Koppal District. 2006.  
13  
14 813 (49) Islam M, Parvez A. Dalit Initiatives in Bangladesh. Dhaka: Nagorik Uddyog & Bangladesh Dalit  
15 814 and Excluded Rights Movement; 2013.  
16  
17 815 (50) Johnston HB. Addressing social exclusion: analyses from South Asia and southern Africa. *J Health*  
18 816 *Popul Nutr* 2009; 27(4):423-425.  
19 817  
20  
21  
22  
23 818  
24  
25  
26  
27  
28  
29  
30  
31  
32  
33  
34  
35  
36  
37  
38  
39  
40  
41  
42  
43  
44  
45  
46  
47  
48  
49  
50  
51  
52  
53  
54  
55  
56  
57  
58  
59  
60



1  
2  
3  
4  
5  
6  
7  
8  
9  
10  
11  
12  
13  
14  
15  
16  
17  
18  
19  
20  
21  
22  
23  
24  
25  
26  
27  
28  
29  
30  
31  
32  
33  
34  
35  
36  
37  
38  
39  
40  
41  
42  
43  
44  
45  
46  
47  
48  
49  
50  
51  
52  
53  
54  
55  
56  
57  
58  
59  
60

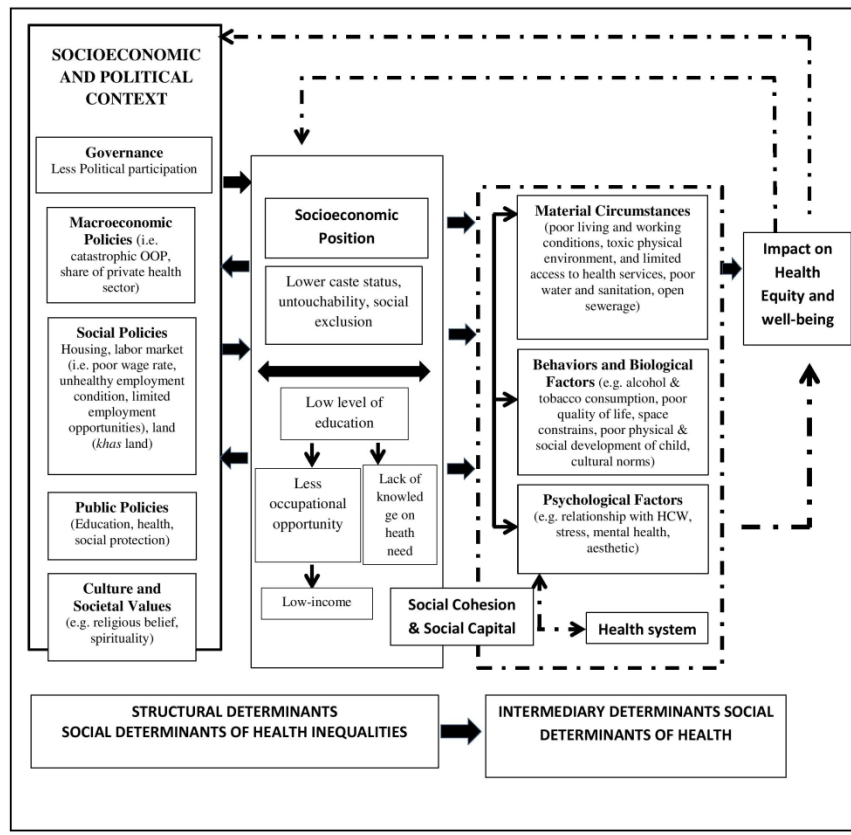

215x279mm (300 x 300 DPI)

# BMJ Open

## Qualitative exploration of socio-cultural determinants of health inequities of Dalit population in Bangladesh

|                                 |                                                                                                                                                                                           |
|---------------------------------|-------------------------------------------------------------------------------------------------------------------------------------------------------------------------------------------|
| Journal:                        | <i>BMJ Open</i>                                                                                                                                                                           |
| Manuscript ID                   | bmjopen-2018-022906.R1                                                                                                                                                                    |
| Article Type:                   | Research                                                                                                                                                                                  |
| Date Submitted by the Author:   | 01-Jun-2018                                                                                                                                                                               |
| Complete List of Authors:       | Kabir, Ashraful; Dushtha Shasthya Kendra , Research Maitrot, Mathilde ; The University of York, Department of Social Policy and Social Work<br>Ali, Ahsan; Dhaka University, Anthropology |
| <b>Primary Subject Heading</b>: | Public health                                                                                                                                                                             |
| Secondary Subject Heading:      | Health services research, Health policy, Qualitative research                                                                                                                             |
| Keywords:                       | caste, Dalit, qualitative method, sociocultural determinants, health inequalities, untouchability                                                                                         |
|                                 |                                                                                                                                                                                           |

SCHOLARONE™  
Manuscripts

1  
2  
3 1 Qualitative exploration of socio-cultural determinants of health inequities of Dalit  
4 population in Bangladesh

5 2  
6  
7 3 **Short Title: Socio-cultural determinants of health inequities: Dalit population,**  
8  
9 4 **Bangladesh**

10  
11  
12  
13 5 Ashraful Kabir,<sup>1ab\*</sup>,

14  
15  
16 6 Email: [ashraful.icddrb@gmail.com](mailto:ashraful.icddrb@gmail.com)

17  
18 7 Mathilde Rose Louise Maitrot,<sup>2</sup>

19  
20  
21 8 Email: [Mathilde.maitrot@york.ac.uk](mailto:Mathilde.maitrot@york.ac.uk)

22  
23  
24 9 Ahsan Ali<sup>3b</sup>

25  
26  
27 10 Email: [israabd@gmail.com](mailto:israabd@gmail.com)

28  
29  
30 11 <sup>1</sup>Dushtha Shasthya Kendra, Dhaka, Bangladesh

31  
32 12 <sup>2</sup>Department of Social Policy and Social Work, The University of York, United Kingdom

33  
34  
35 13 <sup>3</sup>Department of Anthropology, Dhaka University, Bangladesh

36  
37  
38 14 <sup>a</sup>Dushtha Shasthya Kendra, Dhaka, Bangladesh

39  
40  
41 15 <sup>b</sup>Department of Anthropology, Dhaka University, Bangladesh

42  
43  
44 16 **\*Corresponding author**

45  
46  
47 17 Email: [ashraful.icddrb@gmail.com](mailto:ashraful.icddrb@gmail.com)

## 18 ABSTRACT

19 **Objectives:** In recent years Bangladesh has made remarkable advances in health outcomes;  
20 however, the benefits of these gains are unequally shared amongst citizens and population  
21 groups. Among others, Dalits (*jaat* sweepers), a marginalised traditional working community,  
22 have relatively poor access to healthcare services. This study sought to explore the socio-political  
23 and cultural factors associated with health inequalities among Dalits in an urban setting.

24 **Design:** An exploratory qualitative study design was adopted. The acquired data was analysed  
25 using an iterative approach which incorporated deductive and inductive methods in identifying  
26 codes and themes.

27 **Settings:** This study was conducted in two sweeper communities in Dhaka city.

28 **Participants:** Participants were Dalit men and women (fourteen in-depth interviews, mean  
29 age±SD 30±10; and five focus group discussions), and the community leaders and NGO workers  
30 (seven key informant interviews).

31 **Results:** The health status of members of these Dalit groups is determined by an array of social,  
32 economic and political factors. Dalits (untouchables) are typically considered to fall outside the  
33 caste-based social structure and existing vulnerabilities are embedded and reinforced by this  
34 identity. Dalits' experience of precarious access to healthcare or poor healthcare is an important  
35 manifestation of these inequalities and has implications for the economic and social life of Dalit  
36 populations living together in geographically constrained spaces.

37 **Conclusions:** The provision of clinical healthcare services alone is insufficient to mitigate the  
38 negative effects of discriminations and to improve the health status of Dalits. A better

1  
2  
3 39 understanding of the precise influences of socio-cultural determinants of health inequalities is  
4  
5 40 needed, together with the identification of the strategies and programmes needed to address these  
6  
7  
8 41 determinants with the aim of developing more inclusive health service delivery systems.  
9

10  
11 42 **Key Words:** Bangladesh; caste; Dalit; qualitative method; sociocultural determinants; health  
12  
13 43 inequalities; social exclusion; untouchability  
14  
15

#### 16 44 **Strengths and limitations of this study**

- 17  
18  
19 45 • This study used the ‘Commission on Social Determinants of Health Conceptual  
20  
21 46 Framework’ proposed by the World Health Organization (WHO) which allow us to  
22  
23 47 investigate how a set of social, cultural, economic and political elements interact and play  
24  
25  
26 48 a determining role in shaping Dalits’ health status.
- 27  
28 49 • To the best of our knowledge this is the first study that comprehensively examines how  
29  
30 50 socio-cultural and political elements are interconnected, and how they produce, sustain,  
31  
32 51 and reinforce health inequality among the Dalit population in Bangladesh.
- 33  
34  
35 52 • To analyse the qualitative data we used an iterative approach which blended deductive  
36  
37 53 and inductive methods to identify and generate codes and themes.
- 38  
39  
40 54 • The main limitation is that the sample size is unavoidably small; therefore, the  
41  
42 55 generalizability of the findings to other areas might be limited due to the contextual  
43  
44 56 characteristics. Nonetheless, considering the data collected, we believe that this study  
45  
46 57 provides an in-depth understanding of the determinants of health inequalities among Dalit  
47  
48 58 population in Bangladesh.  
49  
50

51  
52 59  
53  
54  
55  
56  
57  
58  
59  
60

## 60 BACKGROUND

61 In recent years Bangladesh has achieved remarkable progress in terms of health targets, with  
62 declining maternal and neonatal mortality rates, increased immunisation coverage, greater life  
63 expectancy at birth, and increased vitamin A supplementation<sup>1;2</sup>. However, these advances are  
64 experienced unequally across the population, often leaving behind individuals and communities  
65 that are economically marginalised and socially excluded. Improved health services, especially  
66 those provided by the state, are not yet effectively distributed to all individuals and groups, and  
67 frequently fail to reach ethnic minorities, people living in remote areas, extremely poor  
68 individuals, slum and pavement dwellers, and other marginalised groups<sup>3</sup>. This paper focuses on  
69 analysing the healthcare barriers experienced by one marginalised group, the Dalits, the  
70 untouchables.

71 Bob et al.<sup>25</sup> explain that the word 'Dalit' comes from the Marathi language and means  
72 suppressed, 'broken up', downtrodden or oppressed, and the term was first used by Dr B. R.  
73 Ambedkar during the late period of British colonial rule. The Dalits of Bangladesh are a  
74 marginalised group whose identity is often characterised by the manual and low-status nature of  
75 their occupations. This identity and social status are strongly associated with their ancestral  
76 occupations, which were typically considered unclean and impure. In the 1872 census conducted  
77 in Bengal, the majority of Dalits were referred to by the term *Chandala*, a Sanskrit word for  
78 someone who deals with the disposal of corpses, a Hindu outcaste. In 2017 they are often called  
79 *Harijan*, a term coined by Mahatma Gandhi meaning 'children of God', or more commonly  
80 referred to by their occupation, family descent, ethnicity, or derogatory terms. The dalits often  
81 engage in sweeping activities, such as cleaning latrines, removing rubbish, skinning cattle, and

1  
2  
3 82 sweeping streets and houses. They scavenge in Bangladesh's cities and towns, and are  
4  
5 83 designated as 'untouchable' within the caste system of the Indian subcontinent <sup>4,5</sup>.

6  
7  
8 84 Healthcare issues of the Dalit population in Bangladesh remain largely neglected in the national  
9  
10 85 government's development agenda <sup>6,7</sup>, despite its strong constitutional commitment to 'not  
11  
12 86 discriminate against any citizen on grounds only of religion, race, caste, sex or place of birth'  
13  
14 87 (The Bangladesh Constitution of 1972, Article 28 (1). Nationally representative survey data on  
15  
16 88 Dalit health inequality is unavailable. As Nagorik Uddyog (Bangladesh Dalit and Excluded  
17  
18 89 Rights Movement) notes:

19  
20  
21  
22  
23 90 *"Health surveys and research programmes undertaken with respect to the 'public health*  
24  
25 91 *situation' in the country do not pay special attention to the child and maternal health*  
26  
27 92 *conditions in the colonies and settlements where Dalit communities live. Because of this*  
28  
29 93 *non-attention to their specific health situation, their suffering and specific requirements*  
30  
31 94 *to access non-discriminatory and affordable health care remain unreported and*  
32  
33 95 *unattended to.*"<sup>8</sup>

34  
35  
36  
37  
38 96 A few available studies substantiate that Dalits' health outcomes are poor. Chowdhury reported  
39  
40 97 that Dalit are generally afflicted by skin diseases, diarrhea, tuberculosis, pneumonia at a higher  
41  
42 98 level than the non-Dalit population <sup>9</sup>. Islam et al. <sup>10</sup> reported that water-borne disease are highly  
43  
44 99 prevalent among Dalit population as water and sanitation facilities is scarce in the slum— with  
45  
46 100 reports of nearly 12,000 Dalit sharing two water points in Dhaka, and nearly 58% of Dalit have  
47  
48 101 no access to sanitary latrine <sup>9</sup>. A study conducted outside the capital city, found that in a Dalit  
49  
50 102 community in Jessore city around half of pre-school children were suffering from chronic  
51  
52 103 stunted (58%) and underweight (45%), while nationally the corresponding figure is 36% and  
53  
54  
55  
56  
57  
58  
59  
60

1  
2  
3 104 33%<sup>11;12</sup>. While no precise official statistics are available regarding the number of Dalits,  
4  
5 105 various sources estimate the population at around 5.5 million<sup>13</sup>, approximately 3-4% of  
6  
7 106 Bangladesh's total population. The lack of official data on this population group indicates the  
8  
9  
10 107 lack of political will to recognise Dalits and the existence of these communities in Bangladesh.

11  
12  
13 108 Prior studies indicate that health inequalities are determined by broader societal factors, such as  
14  
15 109 socio-economic position, housing conditions, working environment, poverty, access to and  
16  
17 110 control of resources, education, and employment<sup>14-18</sup>. A firm understanding of sociocultural  
18  
19 111 determinants of health inequalities, and also of the factors which restrict access to health  
20  
21 112 services, is critical to improving the health outcomes of marginalised communities,<sup>19</sup>. Several  
22  
23 113 studies in Bangladesh have highlighted the socio-economic issues and discrimination  
24  
25 114 encountered by the Dalit population; however, the socio-political and cultural factors that  
26  
27 115 contribute to generating severe health inequalities remain largely unexplored.

28  
29  
30  
31  
32 116 This present study therefore explores the political, social, economic, and cultural determinants of  
33  
34 117 health inequalities experienced by the majority of the Dalit population. We examine how caste-  
35  
36 118 based positions generate and reinforce social stratification in society, and determine health  
37  
38 119 inequities within two Dalit population groups in Bangladesh. We argue that health inequalities  
39  
40 120 need to be viewed from a holistic perspective, keeping in mind the intersecting social, political  
41  
42 121 and structural factors.

43  
44  
45  
46  
47 122

48  
49  
50  
51 123

## 52 53 54 55 124 **MATERIALS AND METHODS**



## 125 **Conceptual Framework**

126 Our research was shaped by the ‘Commission on Social Determinants of Health (CSDH)  
127 Conceptual Framework’ proposed by the World Health Organization (WHO) in 2010<sup>20</sup>. This  
128 framework offers a dynamic analytical configuration of the key social institutions and political  
129 structures that affect and shape the health of a population. It explains health status as a social  
130 phenomenon that is produced, configured and sustained through a complex and dynamic  
131 interplay of a set of context-embedded factors. Importantly, it also emphasises the need to  
132 distinguish the mechanisms that generate and reproduce social hierarchies and their multiple  
133 manifestations. The conceptual framework includes three interactive levels of dynamic  
134 influences: the wider socio-political context, individual socio-economic position, and  
135 intermediary socio-economic influences.

136 **Fig 1** Commission on Social Determinants of Health (CSDH) Conceptual Framework [adapted from the  
137 WHO (2010)] [to be placed]

138  
139 The first level, the socio-political context, focuses on the social relationships within a society  
140 which organise and configure hierarchies and social stratification by defining individual  
141 positions and roles. This includes the labour market, the educational system, and political  
142 institutions. The second level considers individual or groups of individuals’ positionality in  
143 relation to these macro-structures and mechanisms. It understands individual socio-economic  
144 position as a function of the degree of exposure to health risks and vulnerabilities that result in  
145 differential health outcomes for an individual and/or a population. Key individual socio-  
146 economic characteristics include income, education, occupation, level of knowledge and  
147 information. Combined with structural elements, these form what is referred to as ‘structural

1  
2  
3 148 determinant'. Thus structural determinants shape patterns of access to resources (for example  
4  
5 149 here, health services) and are rooted in socio-economic institutions, policies and political context  
6  
7  
8 150 that construct, reinforce, and maintain social hierarchies in various social systems, institutions,  
9  
10 151 policies and sociocultural values.

11  
12  
13 152 The intermediary socio-economic context refers to a circumstance whereby an individual and/or  
14  
15 153 group have a distinct experience of materials, behavioural options, psychological supports, and  
16  
17  
18 154 healthcare facilities that consecutively shape specific determinants of health status (intermediary  
19  
20 155 determinants). Therefore, this framework summarises and synthesises the view that social  
21  
22 156 determinants of health inequality are constructed, functioning, and sustained through the act of  
23  
24  
25 157 long causal interceding factors (Figure 1).

26  
27  
28 158 Although other frameworks have been developed to understand the social determinants of health,  
29  
30 159 we found this conceptual framework particularly useful for exploring the dynamic relationships  
31  
32 160 between social structures and political determinants of health inequalities. Several contemporary  
33  
34  
35 161 models, for example the psychosocial, social production of diseases/political economy of health,  
36  
37 162 and the eco-social models, tend to explain disease distribution rather than focusing on the  
38  
39 163 mechanism of disease causation<sup>21-24</sup>. Therefore, in contrast to the WHO model, these  
40  
41  
42 164 frameworks leave contextual and socio-political aspects of health inequalities largely  
43  
44 165 unexplored. The results presented in this paper are provided together with an exploration of the  
45  
46 166 socio-economic settings following the CSDH Conceptual Framework.

### 47 48 49 167 **Study Population and Settings**

50  
51  
52 168 This study was conducted in two sweeper communities in Dhaka city: the *Agargaon* Public  
53  
54  
55 169 Works Department (PWD) Sweeper Colony, which is located adjacent to Dhaka Orthopaedic  
56  
57  
58  
59  
60

1  
2  
3 170 Hospital, and the Ganaktuli sweeper colony located in the city's Hazaribagh area. Commonly,  
4  
5 171 the sweepers in Agargaon and Ganakatuli are known as *Telegu* and *Kanpuri*, respectively. There  
6  
7  
8 172 are no official statistics providing precise population figures for these colonies, although  
9  
10 173 secondary sources indicate that each includes approximately 1,000 families<sup>13</sup>.

### 13 174 **Sampling Strategy**

16 175 Between August and October 2014 the first author conducted interviews and focus group  
17  
18 176 discussions (FGDs, henceforth) with members of these Dalit *colonies*. We applied an inclusion  
19  
20  
21 177 criterion—that participants were aged 18 and above and volunteered to participate—and  
22  
23 178 purposively recruited the study participants to address the research objectives. In this process, we  
24  
25 179 invited individuals who showed a proactive interest to share their experiences, opinions, and  
26  
27  
28 180 time. Using several data collection tools we achieved maximum variation within the sample,  
29  
30 181 purposefully collecting data from participants with various backgrounds, e.g. differing in terms  
31  
32 182 of age, occupation, gender, position within the household, status within the community (leaders),  
33  
34 183 and members of non-governmental organisations (NGOs, henceforth)<sup>25</sup>.

36  
37  
38 184 We conducted 14 in-depth interviews (IDIs, henceforth) with household members from the Dalit  
39  
40 185 community who had sought healthcare in different public and private facilities. We invited  
41  
42 186 individuals to open group discussions on health status and health-seeking behaviour, and invited  
43  
44  
45 187 those individuals who showed a proactive interest in the study for interviews (IDIs, FGDs). The  
46  
47 188 context in which the research was conducted required a high degree of iteration and flexibility in  
48  
49 189 order to build coherence and maximise the validity of the data collected. For example, as part of  
50  
51 190 the sampling strategy, a subtype of purposive sampling known as snowballing or chain sampling

1  
2  
3 191 <sup>26</sup> was used to select individuals who had experienced discrimination of a specific nature or  
4  
5 192 means.

6  
7  
8 193 We also conducted seven key informant interviews (KIIs, henceforth) with community and  
9  
10 194 religious leaders, and also NGO worker, in order to better understand the exclusion process  
11  
12 195 experienced by Dalits in these specific locations. Finally, we conducted five FGDs to help  
13  
14 196 understand communal perceptions and attitudes regarding entitlement to access basic public  
15  
16 197 services. We have selected the key informant on the basis two criteria—who have rich  
17  
18 198 information about the Dalit health aspect, and willing to participate in the interview voluntarily.  
19  
20 199 In case of selecting FGDs participant we considered age, gender, occupation, and volunteer  
21  
22 200 participation. In addition, the authors used participant observations and informal conversations  
23  
24 201 with some non-Dalit (converted Muslim) individuals who lived in the area to further understand  
25  
26 202 the dynamics at play. Many of these informants operated small businesses (e.g. tea stall, plastic  
27  
28 203 shop, video game shop etc.) within and around the sweeper colonies. Finally, we re-visited the  
29  
30 204 participant groups to triangulate the emerging themes and cross-check the accuracy of the data  
31  
32 205 collected. The data collection process ceased when the authors reached a suitable understanding  
33  
34 206 of the key specific historical, socio-cultural belief systems influencing the process of  
35  
36 207 discrimination, marginalisation and stigmatisation <sup>27;28</sup>.

### 37 38 39 40 41 42 43 44 208 **Data Collection Procedure**

45  
46  
47 209 In order to gather information in a semi-structured and systematic manner, we developed an  
48  
49 210 interview schedule. This document was used to guide conversations around key dimensions  
50  
51 211 relevant to our research questions and objectives, including socio-economic, demographic, and  
52  
53 212 political issues that impact upon health conditions among the Dalit population and/or individuals.  
54  
55  
56  
57  
58  
59

1  
2  
3 213 Interviews were semi-structured in order to create a friendly rapport with respondents and leave  
4  
5 214 sufficient space for other themes to emerge. Open-ended questions were used to explore the  
6  
7 215 socio-political and economic factors affect their health services. For example, we wanted to learn  
8  
9 216 more about participants' healthcare-seeking behaviours, experiences when attempting to access  
10  
11 217 healthcare facilities, health information, and interactions with healthcare workers.

12  
13  
14  
15 218 We conducted all except one of the interviews and FDGs in Bengali, a language spoken by the  
16  
17 219 researchers (first author) and most of the participants, while an interpreter was used to interview  
18  
19 220 elderly Dalit men and women who only spoke Telegu and Hindi. On average, IDIs lasted 45 to  
20  
21 221 60 minutes and FDGs between 90 and 120 minutes. After obtaining the participants' consent,  
22  
23 222 IDIs and FDGs were electronically recorded, before being transcribed verbatim and subsequently  
24  
25 223 translated into English. In some cases, several follow-up visits were made to obtain missing  
26  
27 224 information, as well as to enable further probing of some issues. In addition, the authors took  
28  
29 225 detailed field notes during the conversations.

## 30 31 32 33 34 35 226 **Data Analysis**

36  
37 227 To analyse the qualitative data we used an iterative approach which blended deductive and  
38  
39 228 inductive methods to identify and generate codes and themes. Initially, a deductive approach was  
40  
41 229 used through the use of interview guides, which provided a primary template for the framework  
42  
43 230 of data coding. The researchers independently read and reread a few transcripts and identified  
44  
45 231 codes which were incorporated into the coding framework in an inductive form which mirrored  
46  
47 232 the ideas, perceptions, practices, and concepts, concentrating on the health and health services of  
48  
49 233 the participants. After coding all of the interviews we looked for clusters of several codes, which  
50  
51 234 were termed 'themes' or 'concepts'. Focusing on rigour-related criteria in qualitative research,  
52  
53  
54  
55  
56  
57  
58  
59

1  
2  
3 235 such as credibility, transferability, dependability and conformability, a consensus was established  
4  
5 236 by resolving coding differences after discussions among the research team. Throughout the  
6  
7 237 analysis, systematically examined meaningful statements were assigned to the relevant code, and  
8  
9 238 the relationship between the themes was then examined<sup>29</sup>. The analysis process was adequately  
10  
11 239 accomplished by the team of researchers, who have different educational backgrounds and  
12  
13 240 training, through regular collaboration and discussions, self-reflexivity, and triangulation of  
14  
15 241 method and context (field sites), ensuring that no one researcher's view was predominant.  
16  
17  
18  
19

## 20 242 **Patient and Public Involvement**

21  
22  
23 243 In this study we did not involve any patients. However, we purposefully selected men, women  
24  
25 244 community leaders, and NGO workers for the interviews. We entered the community, built  
26  
27 245 rapport and invited the participants for the interview following a pre-set inclusion criteria such as  
28  
29 246 people aged 18 years and above, voluntary participation, and pro-activeness to join in the group  
30  
31 247 discussion. We used an iterative approach which incorporated deductive and inductive methods  
32  
33 248 in framing research questions and identifying codes and themes.  
34  
35  
36  
37

## 38 249 **Ethical Considerations**

39  
40  
41 250 The study protocol was approved and ethical approval was obtained from the 'ethics review  
42  
43 251 committee' at Dhaka University, Bangladesh. Written informed consent was taken and  
44  
45 252 documented via audio recording. Before obtaining consent the research objectives were  
46  
47 253 explained, together with the importance of the study, confidentiality rules, possible harms and  
48  
49 254 benefits, and the participants' right to withdraw from the interviews at any stage during the  
50  
51 255 conversation. Personal and households information, including age, sex, education, occupation,  
52  
53 256 marital status, family composition and religion, was collected; however, the confidentiality of the  
54  
55  
56  
57  
58  
59

257 personal identification of all participants was strictly maintained, with these details only being  
 258 used by the researchers. Data was analysed using the participant identification (ID) number only  
 259 and these ID number were removed prior to reporting the findings.

## 260 RESULTS

### 261 Characteristics of the Participants

262 We firstly describe the socio-demographic characteristics of the participants before presenting  
 263 our results. Table 1 shows the characteristics of the study participants, who ranged in age  
 264 between 22 and 64, and had a mean age of 30 (SD±10) years. More than half of the participants  
 265 (9 out of 14) had received no formal schooling, which is far below the national level of over  
 266 60%. Overall, participants had received a mean of 2.9 (SD±1.3) years of schooling, and only  
 267 three had received any education above the primary level.

268 **Table 1 Socio-demographic backgrounds of the in-depth interview participants (*n* = 14)**

| Characteristics                  | Study Area |           | Combined |
|----------------------------------|------------|-----------|----------|
|                                  | Agargaon   | Ganaktuli |          |
| Age in years (mean ±SD)          | 27±8       | 3±9       | 30±10    |
| <b>Education</b>                 |            |           |          |
| 1–5 years ( <i>n</i> )           | 1          | 2         | 3        |
| 6–10 years ( <i>n</i> )          | 0          | 2         | 2        |
| No formal schooling ( <i>n</i> ) | 5          | 4         | 9        |
| Schooling in years (mean ± SD)   | 2.6±1.2    | 3.4±1.4   | 2.9±1.3  |
| <b>Occupation (<i>n</i>)</b>     |            |           |          |
| Cleaning                         | 3          | 5         | 8        |
| Housewife                        | 2          | 1         | 3        |
| Others                           | 1          | 2         | 3        |
| <b>Sex (<i>n</i>)</b>            |            |           |          |
| Male                             | 4          | 4         | 8        |
| Female                           | 2          | 4         | 6        |
| <b>Marital Status (<i>n</i>)</b> |            |           |          |
| Married                          | 4          | 5         | 9        |

|                        |   |   |    |
|------------------------|---|---|----|
| Unmarried              | 2 | 2 | 4  |
| Divorced               | 0 | 1 | 1  |
| <b>Family Type (n)</b> |   |   |    |
| Extended               | 4 | 6 | 10 |
| Nuclear                | 2 | 2 | 4  |
| <b>Religion (n)</b>    |   |   |    |
| Hindu                  | 5 | 8 | 13 |
| Converted Christian    | 1 | 0 | 1  |

269 The majority of the participants were engaged in cleaning activities for Dhaka City Corporation  
 270 and private organisations, while the remainder were employed in household activities, as day  
 271 labourers, or in garment factories. More than half of the participants (10 out of 14) lived with  
 272 their extended family, and almost all (13 out of 14) were Hindu, with just one participant having  
 273 converted to Christianity.

274 Table 2 presents the key demographic characteristics of the FGD participants. Five FGDs were  
 275 conducted: (I) among 6 Agargaon Dalit men (mean age 28, SD  $\pm$  8 years), (II) among 7  
 276 Agargaon Dalit women (mean age 32, SD  $\pm$  7 years), (III) among 6 Ganaktuli Dalit men (mean  
 277 age 39, SD  $\pm$  7 years), (IV) among 8 female Ganaktuli Dalit women (mean age 24, SD  $\pm$  5  
 278 years) and (V) among 9 Ganaktuli Dalit men (mean age 35, SD  $\pm$  6 years).

279 **Table 2 Socio-demographic backgrounds of participants in the focus group discussions (n = 36)**

| Focus group discussion | Age of the participants in years (mean $\pm$ SD) | Location  | Number of Participants | Gender |
|------------------------|--------------------------------------------------|-----------|------------------------|--------|
| I                      | 28 $\pm$ 8                                       | Agargaon  | 6                      | Male   |
| II                     | 32 $\pm$ 7                                       | Agargaon  | 7                      | Female |
| III                    | 39 $\pm$ 7                                       | Ganaktuli | 6                      | Male   |
| IV                     | 24 $\pm$ 5                                       | Ganaktuli | 8                      | Female |
| V                      | 35 $\pm$ 6                                       | Ganaktuli | 9                      | Male   |

280



1  
2  
3 281 The dominant recurring themes were organised into categories reflecting the majority of  
4  
5 282 interactive elements of the ‘social determinants of health’ framework (i.e. socio-economic and  
6  
7 283 political context [including governance, macroeconomic policies, social and public policies,  
8  
9 284 culture and societal values untouchability, caste-based discrimination, and social exclusion]  
10  
11 285 socio-economic position and intermediary determinants).

## 15 286 **Space and Power**

17  
18 287 In an attempt to contextualise our findings within the wider socio-economic and political context,  
19  
20 288 this section starts by providing a brief overview of the political history of the Dalit population.  
21  
22 289 Accounts of the socio-political and economic dimensions of Dalit livelihoods helps in  
23  
24 290 understanding structural determinants of their health.

25  
26  
27  
28 291 In Bangladesh, the majority of untouchable Hindu Dalits have Indian origins. In Bangladesh, as  
29  
30 292 in India and Nepal, untouchable Hindus belong to the lowest social position at the base of the  
31  
32 293 *Varna* system <sup>5</sup>. During the reign of the Mughals, Dhaka was established as the commercial  
33  
34 294 capital of the Bengal Subah by *Subahdar* (viceroy) Islam Khan in 1608. As the city grew to  
35  
36 295 become one of the wealthiest and most prosperous cities in the South Asian region, the Mughal  
37  
38 296 administrator appointed sweepers to maintain sanitation and cleaning activities <sup>4</sup>. In the 1620s  
39  
40 297 there was a large-scale migration of Dalit from India to Dhaka, which was precipitated by  
41  
42 298 massacres by Burmese pirates in 1624-26: they were required to remove dead bodies from the  
43  
44 299 city <sup>7</sup>. It is commonly believed that a large number of Dalits were brought to the city by British  
45  
46 300 colonial administrators after Dhaka gained municipality status, to provide menial services <sup>7</sup>.  
47  
48 301 During the period of British colonial rule (1757-1947), Dalits (Telugu-speaking and Kanpuri  
49  
50 302 sweepers) were brought to East Bengal (now Bangladesh) from the Indian states of Uttar  
51  
52  
53  
54  
55  
56  
57  
58  
59  
60

1  
2  
3 303 Pradesh, Bihar, Andhra Pradesh and many other areas, including Bhagalpur, Motihari, Baliha,  
4  
5 304 Patna, Maddapurpur, Uriya, Gourakpur and Chapra <sup>4;9</sup>. As the English administration rapidly  
6  
7  
8 305 developed townships and local municipalities, these populations were moved to meet the  
9  
10 306 increasing need for sanitation workers.

11  
12  
13 307 The social position and status of Dalits are associated with their ancestral occupations, which  
14  
15 308 were regarded as impure. Dalits are mostly employed by public and private organisations for  
16  
17  
18 309 sweeping activities, cleaning latrines, removing filth, skinning cattle, sweeping streets and  
19  
20 310 houses. Despite the lack of official data on the economic condition of Dalits, some secondary  
21  
22 311 sources claim that Dalits are engaged in low-paid manual work under severe discriminatory  
23  
24 312 terms <sup>9</sup>, and consequently earn much less than national average, with one source claiming that  
25  
26 313 their income lies between BDT 3000-5000 (considering BDT78=US\$1) while the national  
27  
28 314 average is BDT 7203 <sup>9</sup>. Processes of occupational discrimination and unfair payment contribute  
29  
30 315 to excluding the population from secure and safe dwellings. Dalit populations usually reside in  
31  
32 316 unhygienic environments characterised by poor quality, insufficient and irregular water,  
33  
34 317 electricity and gas provision. Overcrowded dwellings, narrow walkways, inadequate basic  
35  
36 318 facilities, such as toilets and water taps, represent significant everyday challenges that become  
37  
38 319 causes of further stigmatisation and marginalisation. Dalit populations often have to rely for  
39  
40 320 access to these services on middlemen and informal brokers, called *mastan* (local thugs); they  
41  
42 321 often rely on violence and illegal deals to negotiate access to resources. The interlacing of social  
43  
44 322 structures and political processes shape the Dalits' common everyday experiences of poverty and  
45  
46 323 constitute their shared identity.

47  
48 324 The material circumstances of the Dalit group in Dhaka city were identified as major  
49  
50 325 intermediary determinants of their health status. Data from all this study's sources (e.g. IDIs,

1  
2  
3 326 FGDs and KIIs) reported poor living conditions, their concentration in government-established  
4  
5 327 slums, or so-called ‘colonies’, and their highly unsafe housing characterised by poor drainage,  
6  
7 328 sanitation and water supply. Houses in government colonies had brick walls and corrugated iron  
8  
9 329 sheet roofs, while those in private slums were constructed from bamboo, tin, and wood. The  
10  
11 330 sweeper slums were very overcrowded, with most respondents reporting that one small room  
12  
13 331 housed 6–10 family members spanning three generations. The environment was also highly  
14  
15 332 polluted, leading to extremely unsafe living conditions.  
16  
17  
18  
19

20 333 Sweeper slums also reported extremely unhygienic and inadequate sanitation conditions <sup>10</sup>.  
21  
22 334 Bacteria, parasites, and disease vectors breed faster when sanitation and drainage systems are  
23  
24 335 poor and when warmer and wetter conditions are prevalent all year round. Such poor living  
25  
26 336 conditions are likely to increase the incidence of vector-borne/water-borne diseases and  
27  
28 337 infections<sup>9 30</sup>. For example, diarrhoea and respiratory infections, such as pneumonia, were  
29  
30 338 commonly reported as the most frequent diseases among children aged less than five years old <sup>9</sup>.  
31  
32 339 In addition, malaria, dengue fever, and *kala-azar* (visceral leishmaniasis) were reported to be  
33  
34 340 prevalent among all age groups.  
35  
36  
37  
38

39 341 The wider socio-political context influences the effects of these material circumstances and has  
40  
41 342 multiple behavioural implications. The data collected from KIIs, IDIs and FDGs clearly indicates  
42  
43 343 that health policies largely ignore the specific needs of Dalits. For example, policies concerning  
44  
45 344 housing, the labour market and land emerged as restricting factors for health. Over centuries,  
46  
47 345 Dalit populations have been allocated space in designated colonies, and Dalit families have  
48  
49 346 shared very small living spaces from generation to generation. Data from all the sources reflected  
50  
51 347 that, despite the potential for promoting basic housing facilities within the government owned  
52  
53 348 land, effective initiatives were never taken due to the lack of policy support. The respondents  
54  
55  
56  
57  
58  
59

1  
2  
3 349 related that government policy favoured congregating Dalits in such designated colonies, rather  
4  
5 350 than facilitating actions for housing supply and availability, and improving quality. One  
6  
7  
8 351 participant reported:

9  
10 352 *“Government policy has never allowed any action that facilitates housing facilities*  
11  
12 353 *for Dalit. They are living like this in colonies for generation; but, neither own nor*  
13  
14  
15 354 *improve its quality.”* (A key informant in Ganaktuli)

16  
17  
18 355 Although the government has issued policy statements and strategies for the redistribution of  
19  
20 356 non-agriculture and agricultural *khas* land (government-owned fallow land) to landless people  
21  
22 357 since the early 1980s, Dalits have not been considered as a potential beneficiary group. More  
23  
24 358 than half of the participant reported that Dalits lack political power to influence the policy  
25  
26 359 aspects in this regard. One of the participants stated

27  
28  
29  
30 360 *You will see very minimal or no action taken from the govt. to solve the housing problem*  
31  
32 361 *of Dalit. I understand govt. can take necessary initiatives easily but it does not take so.*  
33  
34 362 *Why? I believe, Dalit has no power to influence govt. policy aspects. (A 46-year-old male*  
35  
36 363 *in Ganaktuli)*

37  
38  
39  
40 364 Therefore, the scope for improving health outcomes through facilitating housing conditions for  
41  
42 365 Dalits in allocated *khas* land is constrained by government land policy. One respondent stated:

43  
44  
45 366 *“Landlessness is the first and foremost problem that impacts the overall wellbeing of*  
46  
47 367 *Dalit. Dalit living conditions are beyond description. But it can be improved through*  
48  
49 368 *distributing khas land to Dalit as it is provided to landless people. But, it is a matter*  
50  
51 369 *of fact that Dalit cannot fill in the inclusion criteria set by the policy.”* (A key  
52  
53 370 informant in Agargaon)

1  
2  
3 371 Furthermore, the participants, especially the community leaders and NGO workers, believed that  
4  
5 372 the lack of government interventions restricted the potential for improving living conditions,  
6  
7  
8 373 which also affected the health status of the population.  
9

## 10 11 374 **Education and Labour**

12  
13  
14 375 An individual's place in a given society can be described by the concept of 'social position', as  
15  
16 376 proposed by Evans et al.<sup>31</sup>, which is generated and maintained under a broader social context.  
17  
18 377 The social position of an individual is dynamically created by a number of elements, such as  
19  
20  
21 378 caste, religion or gender, which transmit intergenerational discriminations and inequalities.  
22  
23 379 Similar to what Evans et al. argue, when interviewing the participants we found that Dalits'  
24  
25 380 health can be seen as an outcome that is generated from social position, whereby an individual  
26  
27  
28 381 and/or group are unable to fully participate in society because of their socio-cultural identity. The  
29  
30 382 socio-economic context has shaped Dalits' engagement with educational institutions; Dalits face  
31  
32 383 discrimination and are often deprived of education through various means. Our data found that  
33  
34 384 less than 30% of Dalits had received formal schooling, compared to more than 65% of the  
35  
36  
37 385 national population. This figure tends to be even lower outside Dhaka city, as one respondent  
38  
39 386 reported:

40  
41  
42 387 *"In Dhaka city you will find higher number of Dalit who have schooling especially*  
43  
44 388 *among the younger generation. But, the figure will drastically fall if you consider*  
45  
46 389 *among the whole number of Dalit across the country."* (A Dalit activist and key  
47  
48  
49 390 informant from Ganaktuli)

50  
51  
52 391 Respondents reported that their children faced discrimination by educational institutions, for  
53  
54 392 example being denied admission to private schools, rejection and teasing by teachers or students.  
55  
56  
57  
58  
59

1  
2  
3 393 The school enrolment of Dalit girls has also decreased due to the practice of child marriage,  
4  
5 394 which subsequently affected sexual and reproductive health. The very low literacy rate among  
6  
7  
8 395 Dalits resulted in little or no access to health information. One of the key informants reported:

9  
10 396 *“Education is vital for improving health and general well-being. When an individual*  
11  
12 397 *lacks education, he/she eventually will be in a worse position to negotiate access to*  
13  
14  
15 398 *services and information such as nutrition. Low literacy amongst the Dalit, in turn,*  
16  
17 399 *affects their health and overall well-being negatively.”* (A key informant in  
18  
19  
20 400 Ganaktuli)

21  
22  
23 401 The participants further reported that the low level of education nurtured significant information  
24  
25 402 asymmetries, which cause health-related misinformation, and limited occupational and income-  
26  
27 403 earning opportunities. Participants reported that, due to their being excluded from mainstream  
28  
29  
30 404 society, Dalits were perceived to have poor levels of infant and child feeding, breastfeeding  
31  
32 405 practices, immunisation take-up, and personal and family hygiene, with an unhealthy  
33  
34 406 consumption of tobacco and alcohol, etc. One participant stated that:

35  
36  
37 407 *“I have little or no educational background. It might diminish my understanding of*  
38  
39 408 *things like whether and what extent things such as smoking bad for health? ...what*  
40  
41 409 *and how infant and young child should be fed? ...what are good practices for*  
42  
43  
44 410 *washing hands?”* (A 56-year-old woman in Ganaktuli)

45  
46  
47 411 The data also revealed that little and/or no education narrows the occupational opportunities, and  
48  
49 412 subsequently results in low incomes. In addition to poor educational quality, Dalit occupational  
50  
51 413 opportunities are determined by other factors such as caste-based identities and heredity, and  
52  
53  
54 414 together with poor education this reduces their chance of improving their health status.

1  
2  
3 415 The data analysis also showed how the wider structural determinants interact with and influence  
4  
5 416 the status of Dalits and their material circumstances. We found that the labour market both  
6  
7 417 dynamically excludes and adversely includes Dalits by restricting their social and occupational  
8  
9 418 mobility. The data gathered from community participants and key informants strongly suggests  
10  
11 419 that Dalit ancestral occupations have limited their skill sets and continue to force them to expose  
12  
13 420 themselves to high health risks and to rely on very low wages.  
14  
15

16  
17  
18 421 Exposure to a toxic physical environment whilst at work was commonly reported in the  
19  
20 422 interviews and group discussions. Dalits are traditionally linked to their ancestral occupations,  
21  
22 423 which were passed down from generation to generation. Consequently, the majority of Dalits are  
23  
24 424 engaged in sweeping and cleaning activities, manually handling waste material and garbage  
25  
26 425 whilst using no personal protective equipment. This exposes them to large amounts of dust, bio-  
27  
28 426 aerosols, volatile organic matter, airborne particulates, bacteria, noise, and ergonomic stress.  
29  
30 427 Multiple participants reported that sweepers frequently experience infections. As one participant  
31  
32 428 explained:  
33  
34

35  
36 429 *“Dalit always carry health risk with them at workplaces as they are dealing with*  
37  
38 430 *very serious issues such as dumping garbage or removing dirt. But, they do not use*  
39  
40 431 *protective equipment. [...] We are more likely than non-Dalit to experience physical*  
41  
42 432 *injuries or develop infections.”* (A 29-year-old cleaner in Agargaon)  
43  
44  
45

46  
47 433 Similarly, another participant noted:  
48

49 434 *“Dalit sweepers don’t take any dust protective measure; therefore, they inhale it... I*  
50  
51 435 *witnessed my colleagues develop respiratory infections and other airborne*  
52  
53 436 *diseases.”* (A street sweeper in Ganaktuli)  
54  
55  
56  
57  
58  
59  
60



1  
2  
3 437 Nonetheless, Dalit participants were not inclined to look for alternative occupations, as they said  
4  
5 438 there was no scope for them to work outside of these historical, marginalised social spaces.  
6  
7 439 Participants were highly aware of their role in the history of the country, and explained that they  
8  
9 440 would face significant resistance if they tried to access occupations that did not conform to their  
10  
11 441 low social and political status. Occupation-based discrimination, lingering poverty, and social  
12  
13 442 stigmatisation reduced their opportunities to participate in the labour market on equal terms (in  
14  
15 443 relation to non-Dalits) and to engage with activities that were not considered ‘impure’. One FGD  
16  
17 444 participant talked about how the lack of skills combined with long-established social norms  
18  
19 445 strongly discourage Dalits from engaging differently with the labour market:  
20  
21  
22

23  
24 446 *“We are traditionally engaged in sweeping, as my ancestors did. I have no other skill*  
25  
26 447 *except this. How can I do [anything else], for example, pulling a rickshaw or running*  
27  
28 448 *a business? Similarly, people will not come and take a cup of tea if I operate a tea*  
29  
30 449 *stall.”* (A 37 year old cleaner in Agargaon)  
31  
32  
33

34 450 This particular barrier is becoming increasingly problematic, as over 70% of the respondents  
35  
36 451 reported that their access to sweeping jobs had become highly insecure and precarious; although  
37  
38 452 initially the nature of their recruitment in sweeping activities was permanent, Dalits had more  
39  
40 453 recently had to compete for their occupation with non-traditional Muslim sweepers. Although the  
41  
42 454 city corporation’s sweeper recruitment policy states that the Dalit are given a quota, the  
43  
44 455 authorities have not adhered to this system in recent years. The frequent recruitment of non-  
45  
46 456 traditional sweepers by different government and non-government organisations has  
47  
48 457 considerably narrowed Dalits’ employment options, leading to financial hardship:  
49  
50  
51  
52

53 458 *“Some proportion of sweeping is reserved in government offices. However, non-Dalit*  
54  
55 459 *sweepers are getting these jobs through bribes to political leaders and government*  
56  
57  
58  
59



1  
2  
3 460 *officials. Where will we go for work? We will likely have to resort to unsocial and*  
4  
5 461 *illegal activities to survive if this situation is not improved.”* (A housewife in  
6  
7 462 Agargaon)

9  
10  
11 463 The lack of a sufficient and regular income limited Dalit participants’ capacity to afford basic  
12  
13 464 necessities, including food, healthcare (particularly from private facilities), and education fees.  
14  
15 465 Their average monthly household income ranged from BDT 5850 to 8970 (considering  
16  
17 466 BDT78=US\$1), which was insufficient to buy three nutritious meals per day for an extended  
18  
19  
20 467 family.

## 21 22 23 468 **Politics and Relationships**

24  
25  
26 469 Our data has identified a set of social and political factors in the given political and governance  
27  
28 470 system that impact upon the Dalit health status through stratifying individual positions on the  
29  
30 471 basis of hierarchies of power and prestige, and access to resources. Due to their weak socio-  
31  
32 472 economic position, caste-based identity and discrimination, Dalits in the studied areas generally  
33  
34 473 have a weak power of participation in political processes, both at the national and community  
35  
36 474 level. One of the participants from Ganaktuli reported:

37  
38  
39  
40 475 *“Our sweeping identity shapes our world – our work, our rights, our opportunities,*  
41  
42 476 *our limitations, it shapes everything. Hundreds of years we are living a confined life*  
43  
44 477 *in a sense that the mainstream society maintains a greater distance as we belong to*  
45  
46 478 *such a low caste. Where are we? ...In education, in health, in politics? ...nowhere.”*  
47  
48  
49 479 (add details)

50  
51  
52  
53 480 The lack of political participation generated by a lack of consideration and discrimination by  
54  
55 481 other powerful groups limited Dalits’ opportunity to voice their needs and impeded their capacity

1  
2  
3 482 to exercise other constitutional and human rights. Making a direct connection between political  
4  
5 483 engagement and health, one participant voiced:

6  
7  
8 484 *“To my knowledge, no one from the Dalit community has appeared as a candidate in*  
9  
10 485 *any election at national or community level. Even, they are likely to be less*  
11  
12 486 *concerned about this. Such an absence in political process diminishes our capacity*  
13  
14 487 *to protect communal interest concerning health.”* (A 34-year-old Dalit in Agargaon)

15  
16  
17  
18 488 Data from interviews with key informants and group discussants indicated that factors relating to  
19  
20 489 macroeconomic policies influenced the health of Dalits. Macro level policies were considered to  
21  
22 490 be having a negative impact on their health status and health seeking capacity, and public  
23  
24 491 allocations for social protection and healthcare schemes continued to exclude people living in  
25  
26 492 urban settings. One of the key informants reflected on the situation:

27  
28  
29  
30 493 *“Government policy only provides safety-net support for poor in the rural setting.*  
31  
32 494 *However, the Dalit are concentrated on the big cities and smaller towns. ...therefore*  
33  
34 495 *we are not eligible for that.”* (A key informant in Agargaon)

35  
36  
37  
38 496 This policy significantly affected Dalits' capacity to seek and afford treatment in settings where  
39  
40 497 they were exposed to regular health shocks and hazards. For example, in the existing health  
41  
42 498 policy, two-thirds of healthcare costs are financed via an out-of-pocket mechanism <sup>32</sup>, and the  
43  
44 499 urban poor experience limited or no healthcare support. Participants reported that having no  
45  
46 500 social protection schemes meant that they had to rely on considerable out-of-pocket healthcare  
47  
48 501 expenditure in order to access healthcare from both public and private facilities. The low  
49  
50 502 income-earning capacity of Dalits interacted directly with their individual socio-economic  
51  
52 503 condition, particularly for those suffering from chronic health conditions that required prolonged

1  
2  
3 504 and continuous care and medication. The inability to afford treatment was frequently reported as  
4  
5 505 an important barrier to better health by respondents suffering from cardiac issues, diabetes and  
6  
7  
8 506 renal disease due to out-of-pocket costs. One of them said:

9  
10 507 *“I have been suffering from diabetes for the past years. The doctor prescribed*  
11  
12 508 *several drugs that I imperatively need to continue taking to control my sugar levels. I*  
13  
14  
15 509 *cannot afford such drug for rest of my life [...] you will never expect to get diabetic*  
16  
17 510 *drug free of cost.”* (A street sweeper in Ganaktuli)

18  
19  
20 511 Some participants highlighted the heavy reliance on expensive private health service providers as  
21  
22 512 a significant determinant of bad health. They indicated that an individual’s health status tended  
23  
24  
25 513 to deteriorate when they needed to access healthcare services from a local private institution. A  
26  
27 514 key informant in Ganaktuli explained that local private healthcare facilities generally tended to  
28  
29  
30 515 be better equipped than local government facilities, and increasingly played a ‘vital role in  
31  
32 516 healthcare services delivery.’ However, he noted:

33  
34  
35 517 *“If the problem is not minimal and, you must seek consultant at private facilities this*  
36  
37 518 *involves huge expenses that are most likely beyond the capacity of Dalit. ...I know a*  
38  
39 519 *few individual who have been suffering from chronic disease but fail to take care*  
40  
41 520 *from private clinic due to the cost incurred.”* (A key informant in Ganaktuli)

42  
43  
44  
45 521 Beyond the costs incurred by care, participants also identified the behaviour of healthcare  
46  
47 522 professionals in public and private facilities as barriers to their accessing better health.  
48  
49 523 Respondents shared experiences of entrenched stigmatisation and discrimination that hampered  
50  
51 524 their willingness and motivation to see a doctor, thereby generating a process of self-exclusion  
52  
53  
54 525 from these facilities.

1  
2  
3 526 The Dalit identity generates considerable caste-based discrimination, enhancing exclusion,  
4  
5 527 broadening inequalities, and restricting them from accessing healthcare. Dalit people, considered  
6  
7 528 untouchable due to their traditional employment that brings them into contact with human  
8  
9 529 excreta, dirt, garbage, bad odours, dead bodies, and other elements, are defined by others by their  
10  
11 530 impurity. One participant described how mainstream society perceives the Dalit, and the  
12  
13 531 following quote denotes how societal perceptions have been internalised by Dalits themselves:  
14  
15

16  
17 532 *“We are methar [a Bangla colloquial term signifying degradation, disgust], nothing*  
18  
19 533 *more than that. Our position can be nowhere else but at the bottom of the society.”*

20  
21  
22 534 (A 34-year-old scavenger in Agargaon)  
23  
24

25 535 These socio-economic mechanisms and Dalits’ identity interact with other factors to create  
26  
27 536 psychosocial factors that determine their health status. Due to social discrimination and  
28  
29 537 exclusion, Dalit often lose their self-worth and experience depression and shame. Such feelings  
30  
31 538 in turn lead to social isolation and further narrow individual and/or community participation in  
32  
33 539 health programmes. The participants further stated that Dalits could not fully participate in  
34  
35 540 community-based health programmes focusing on child and maternal health, the promotion of  
36  
37 541 nutrition, immunisation, sanitation and hygiene. One participant explained the situation as  
38  
39 542 follows:  
40  
41  
42  
43

44 543 *“Dalit are social excluded and discriminated in many ways. Due to such*  
45  
46 544 *discrimination and exclusion, they might lose self-esteem to be open-minded in*  
47  
48 545 *participation of community-led health programmes.”* (A 34-year-old cleaner in  
49  
50 546 Agargaon)  
51  
52  
53  
54  
55  
56  
57  
58  
59  
60

1  
2  
3 547 Prejudices against the Dalits are also reproduced by healthcare workers. Most respondents  
4  
5 548 reported that healthcare workers were more likely to consider their health problems to be less  
6  
7 549 serious than those of non-Dalits in order to limit the amount of time spent with them and their  
8  
9 550 exposure to ‘impurity’. In small townships and localities outside Dhaka city, for example in  
10  
11 551 primary level healthcare facilities where Dalits are easily identified by locals, they reported being  
12  
13 552 more likely to face such prejudice and discrimination from healthcare workers. Multiple  
14  
15 553 participants echoed the following experience of visiting a health facility:  
16  
17  
18

19  
20 554 *“Sometimes we do not disclose our identity to avoid neglect and unpleasant*  
21  
22 555 *situations. ... I can tell you a tragic story about the hospital admission of a Dalit*  
23  
24 556 *woman. She was denied to get hospital admission and was kept lying on the floor of*  
25  
26 557 *the balcony because she was a Dalit. Meanwhile, she developed additional problems*  
27  
28 558 *— common cold, fever and breathing difficulties in such cold weather. Only later,*  
29  
30 559 *when we put the issue forward the hospital authority admitted her and provided a*  
31  
32 560 *bed.”* (A 51-year-old Dalit rights activist in Ganaktuli)  
33  
34  
35

36  
37 561 Several participants described a lack of attention from healthcare workers, and difficulties in  
38  
39 562 obtaining adequate information regarding their health problems and required treatments. The  
40  
41 563 following excerpt reflects this situation:  
42  
43

44 564 *“Doctors/nurses are unwilling to discuss details regarding any health information or*  
45  
46 565 *health intervention in the facilities. They just provide minimal medicine and maintain*  
47  
48 566 *indifference when asked about a health-related problem.”* (A 55-year-old leather  
49  
50 567 worker in Ganaktuli)  
51  
52  
53  
54  
55  
56  
57  
58  
59

1  
2  
3 568 Such negligent and discriminatory behaviour on the part of healthcare providers made Dalits  
4  
5 569 hesitant to participate in health promotion activities to enhance their own health, and even  
6  
7 570 influenced their decisions to delay seeking treatment for infectious diseases. One of the key  
8  
9 571 informants explained how the socio-political position of the Dalit community impacted upon the  
10  
11 572 care-seeking behaviour of Dalits:  
12  
13  
14

15 573 *“The Dalit live as a minority within the mainstream. All aspects of their lives – such*  
16  
17 574 *as profession, access to services, rights and obligations, decisions, and so on – are*  
18  
19 575 *determined and ascribed by these social and political contexts.”* (A NGO worker in  
20  
21 Ganaktuli)  
22  
23  
24

25 577 Denied access to formal and informal safety nets, this marginalisation is reinforced by  
26  
27 578 idiosyncratic forms of discrimination based on class, gender, physical ability and age in  
28  
29 579 particular. Under-nutrition of low-income (often extreme poor) adolescent girls, pregnant  
30  
31 580 mothers and elderly widows was found to be particularly severe. Health inequalities experienced  
32  
33 581 by Dalits were also influenced by the manner in which policies are developed and translated into  
34  
35 582 practice. One key informant stated:  
36  
37  
38

39 583 *“The state did not consider that context-specific healthcare provision might be*  
40  
41 584 *effective for providing services to this kind of disadvantaged group of people. We*  
42  
43 585 *need the formulation of policies that cover the delivery of health services to the Dalit*  
44  
45 586 *and other groups of people who are in an unfavourable position to seek care.”* (A  
46  
47 587 Dalit rights activist in Agargaon)  
48  
49  
50

51  
52 588 In addition, some respondents reported that being a Dalit was associated with behaviours that  
53  
54 589 negatively affected their health. Many respondents claimed that male Dalits were likely to  
55  
56  
57  
58  
59  
60

1  
2  
3 590 consume high quantities of low-quality alcohol and tobacco, noting that this behaviour can be  
4  
5 591 explained by the difficult occupations and psycho-social pressure they experienced. Exposure to  
6  
7  
8 592 bad odours, dirt and dead organisms can induce vomiting and appetite loss, and according to  
9  
10 593 some respondents consuming alcohol and cigarettes mitigated the negative psychological and  
11  
12 594 physical effects of this type of work. Historically, Dalits have been characterised by such  
13  
14 595 depictions and so this is not new; it is beyond the scope of this research to assess the veracity of  
15  
16 596 such claims. However, what is noteworthy is how such claims serve to further stigmatise  
17  
18 597 members of this population group, who according to some respondents, are “*habituated to*  
19  
20 598 *consume alcohol and tobacco products*” as they believe it is “*a habit rooted in their*  
21  
22 599 *occupational roles and psychosocial identity*” (A 23-year-old scavenger in Agargaon). Our data  
23  
24 600 suggests that Dalit children living in marginalised settlements suffer from stigmatisation and are  
25  
26 601 therefore constrained in their physical mobility and social interactions. Although it was not  
27  
28 602 possible to measure the physical growth of children due to the nature of this study, participants  
29  
30 603 reported that children, particularly those aged under 5 years, were likely to be undernourished.  
31  
32 604 Poverty, low health information and awareness, and physical environment were reported as the  
33  
34 605 most likely causal factors for such poor physical and social development of young children.  
35  
36  
37  
38  
39  
40

41 606 As a response to the hostile wider socio-political context and challenging material circumstances,  
42  
43 607 traditional health practices and rituals are widely practised within the Dalit community.  
44  
45 608 Religious beliefs and spirituality influence their health status and attitudes towards seeking  
46  
47 609 treatment. It was for example found that low-income Dalits adhering to strict religious beliefs  
48  
49 610 were more likely to rely on faith-based healing for sexual and reproductive health, pregnancy  
50  
51 611 care, and infant and child feeding practices.  
52  
53  
54

## 55 612 **DISCUSSION**

1  
2  
3 613 To the best of our knowledge this is the first study aimed at understanding the socio-cultural and  
4  
5 614 economic determinants of health inequalities in the Dalit population in Bangladesh, and it applies  
6  
7 615 the CSDH Conceptual Framework developed by the WHO. Our analysis suggested that the  
8  
9 616 mechanisms of social and economic discrimination that result in severe health inequalities (as  
10  
11 617 claimed by the participants) for Dalits are supported and reinforced by an array of interconnected  
12  
13 618 structural factors, including geographic marginalisation, poor living conditions, low formal  
14  
15 619 education, little political representation, poor access to resources, limited labour market  
16  
17 620 engagement, and stigmatisation. Stigmatisation was found to be pervasive, and to directly shape  
18  
19 621 relational and structural determinants of health.  
20  
21  
22

23  
24 622 Dalits' occupation-based identity determines their ability to interact with non-Dalits and with the  
25  
26 623 state, and their stigmatisation as an impure, unhygienic, uneducated population group reinforces  
27  
28 624 these processes and worsens their material and psychosocial circumstances. These are identified  
29  
30 625 as significant intermediary determinants of their health status within this specific urban context  
31  
32 626 <sup>33</sup>. Our findings confirm that health inequalities are rooted in the social process, whereby  
33  
34 627 structural, contextual, and interpersonal factors intersect and influence each other <sup>34-36</sup> and build  
35  
36 628 on these to show how pervasive identity-based discrimination perpetuates the causes and effects  
37  
38 629 of health inequalities.  
39  
40  
41  
42  
43

44 630 Untouchability and caste-based discrimination perpetuate an exclusionary process that results in  
45  
46 631 this population belonging to a lower caste status with limited or no access to or participation in  
47  
48 632 healthcare services or health seeking behaviours, and has been similarly noted by studies  
49  
50 633 conducted in Indian societies <sup>37-41</sup>. Broadly, these socio-culturally constructed exclusionary  
51  
52 634 processes restrict Dalits' economic, political, social and cultural participation, which in turn  
53  
54 635 negatively impacts upon their health and well-being at the individual, communal, regional, and  
55  
56  
57  
58  
59



1  
2  
3 636 global levels. These observations are also in line with a prior report of the Social Exclusion  
4  
5 637 Knowledge Network (SEKN) to the World Health Commission on Social Determinants of  
6  
7 638 Health, which stated that sociocultural exclusion is a dynamic and multi-dimensional process  
8  
9 639 driven by unequal power relations<sup>35;38;42</sup>.

10  
11  
12  
13 640 Our results also highlight power differentials between Dalit individuals and healthcare  
14  
15 641 professionals, which enhance health inequities and further victimise Dalits, and are in line with  
16  
17 642 the results of another study in India<sup>43</sup>. These power differentials further repress the social,  
18  
19 643 political, and economic participation of Dalits, leading to the unequal and unjust distribution of  
20  
21 644 resources and access to services. Overall, sociocultural exclusionary processes generate,  
22  
23 645 preserve, and reproduce inequalities regarding participating in, accessing, and utilising health  
24  
25 646 services, which perpetuate intergenerational deprivation and discrimination. Other studies have  
26  
27 647 demonstrated that caste-based exclusion, deprivation, and discrimination have been practised on  
28  
29 648 the Indian subcontinent for thousands of years<sup>4;43</sup>.

30  
31  
32  
33  
34  
35 649 The socio-economic and political context, together with macro-policies, facilitate the  
36  
37 650 exclusionary process whereby Dalit people have limited opportunities for livelihood  
38  
39 651 development and to improve their economic condition, consequently reducing their income  
40  
41 652 opportunities and trapping them in poverty. This trap is sustained and enhanced through  
42  
43 653 intergenerational transmission. Income is strongly associated with health and influences a range  
44  
45 654 of material circumstances that directly impact health. Economic exclusion also determines access  
46  
47 655 to and utilisation of health services, while economic marginalisation appears to limit the  
48  
49 656 provision of healthcare, health-seeking behaviours, and access to other basic services provided  
50  
51 657 by members of society and the state<sup>31;44</sup>. In addition, social and public policies narrow  
52  
53 658 healthcare utilisation and healthcare-seeking, e.g. catastrophic out-of-pocket costs and the  
54  
55  
56  
57  
58  
59

1  
2  
3 659 shrunken delivery of healthcare by public health facilities. The literature shows that over the  
4  
5 660 recent years out-of-pocket costs are gradually increasing due to the steady expansion of private  
6  
7 661 healthcare services <sup>32;45</sup> and this affects healthcare seeking and utilisation. The wider structural  
8  
9 662 factors facilitate the Dalits' compromised material circumstances, unhealthy lifestyle, and social  
10  
11 663 isolation. As noted by other studies <sup>30;46;47</sup>, our findings show that poor living and working  
12  
13 664 conditions, limited healthcare access and support, poor state of water and sanitation, habit of  
14  
15 665 tobacco consumption, stress, and isolation from health services, negatively impact upon health  
16  
17 666 status and healthcare seeking. A lower social background was observed by Dubey <sup>48</sup> to  
18  
19 667 contribute to weakening social networks that perpetuate poor healthcare access and healthcare  
20  
21 668 seeking. Furthermore, the health system itself influences the health of Dalits as it presents Dalits  
22  
23 669 with greater financial costs when accessing or seeking healthcare, as noted in other studies <sup>32;49</sup>.  
24  
25 670 Moreover, access to and acceptance by healthcare providers is determined by the social position  
26  
27 671 of individuals and groups; Dalits' low social position restricts their access to healthcare  
28  
29 672 professionals, as had been previously reported in many regions across the world <sup>46;50;51</sup>. Our  
30  
31 673 findings suggest that the health status of the Dalit community is not shaped solely by clinical  
32  
33 674 issues but also by a range of sociocultural determinants, as proposed in several other studies <sup>10;52</sup>.  
34  
35 675 For disadvantaged, marginalised, and socio-culturally excluded individuals or groups like Dalits,  
36  
37 676 health outcome improvement is closely linked to public policies and actions that address socio-  
38  
39 677 cultural determinants of health inequities, with the government playing a central role <sup>53</sup>.

## 678 **LIMITATIONS OF THE STUDY**

679 The results of this study are based on data collected from the Dalit population in Dhaka City;  
680 therefore, the results may not be transferable to other settings, for example a small Bangladeshi  
681 town. Nonetheless, considering the data collected, we believe that this study provides an in-depth

1  
2  
3 682 understanding of a set of social, cultural, economic and political factors that strongly determine  
4  
5 683 the health outcomes of Dalits.  
6  
7

## 8 9 684 **CONCLUSIONS AND IMPLICATION FOR THE STUDY**

10  
11  
12 685 Although this subject has previously been sporadically discussed in newspaper reports, NGO  
13  
14 686 reports and media reports, this paper is one of the first qualitative studies to explore a vast array  
15  
16  
17 687 of factors that determine health inequalities in urban Dalit populations in Bangladesh. This study  
18  
19 688 is expected to contribute to knowledge by investigating how these elements interact and play a  
20  
21 689 determining role in shaping Dalits' health status. This study supports the view that Dalit health  
22  
23 690 inequalities are largely affected by a wide range of socio-cultural factors which can be observed  
24  
25 691 in societies across many regions of South Asia.  
26  
27

28  
29 692 Importantly, we argue for the need to recognise the significant intermediary effects of everyday  
30  
31 693 discrimination and stigmatisation, perpetuated by socio-economic structures, on educational  
32  
33 694 achievement, political participation, occupations and health behaviours. Dalits' social and  
34  
35 695 political history shapes their social position in society today by limiting their power relative to  
36  
37 696 non-Dalits in key social structures, including the labour market and health institutions. These  
38  
39 697 mechanisms enhance exclusionary processes through mutually reinforcing sets of socio-cultural  
40  
41 698 and economic dynamics, and these generate, sustain, deepen, reinforce and reproduce  
42  
43 699 inequalities in the health of Dalit populations. Therefore, it is unlikely that the health status of  
44  
45 700 Dalit populations will be improved through the better clinical performance of existing healthcare  
46  
47 701 providers alone. Recognition of the hostility of existing institutions and addressing entrenched  
48  
49 702 exclusionary processes (including self-exclusion) and adverse inclusion is needed, together with  
50  
51  
52  
53  
54  
55  
56  
57  
58  
59  
60

1  
2  
3 703 research on the potential benefits of developing state-initiated social protection schemes focusing  
4  
5 704 on deepening the social inclusion agenda.  
6  
7  
8

9 705  
10  
11

12 706  
13  
14

15 707  
16  
17

18 708  
19  
20

21 709  
22  
23

24  
25  
26  
27 710 **Abbreviations**  
28

29  
30  
31 711 BDT: Bangladesh Taka; CSDH: Commission on Social Determinants of Health; FGD: Focus  
32

33 712 Group Discussions; IDI: In-depth Interviews; KII: Key Informant Interviews; NGO: Non-  
34

35 713 governmental Organisations; PWD: Public Works Department; SEKN: Social Exclusion  
36

37 714 Knowledge Network; WHO: World Health Organization; USD: United State Dollar;  
38  
39  
40  
41  
42  
43  
44  
45  
46  
47  
48  
49  
50  
51  
52  
53  
54  
55  
56  
57  
58  
59  
60

## 715 **Acknowledgements**

716 The authors would like to extend their gratitude to the Department of Anthropology, Dhaka  
717 University for their approval of this study. The authors are also grateful to the members of the  
718 two Dalit communities, and NGO workers who participated in the interviews and group  
719 discussions.

## 720 **Funding**

721 This study received no funding from any sources.

## 722 **Availability of data and materials**

723 As we informed the participants during the consent process that data would only be shared  
724 within the research team, then the data cannot be made available publicly. However, we shared  
725 the interview and discussion guidelines under 'additional supporting files.' Interested parties may  
726 contact Mr. Md. Shahin Chowdhury ([anthro.du@yahoo.com](mailto:anthro.du@yahoo.com)), Senior Administrative Assistant,  
727 Department of Anthropology, Dhaka University, for further inquiries in this regard.

## 728 **Author contributions**

729 AK ([ashraful.icddrb@gmail.com](mailto:ashraful.icddrb@gmail.com)) conceptualized the study, participated in data collection and  
730 analysis, and prepared the first draft of the manuscript. MRLM ([mathilde.maitrot@york.ac.uk](mailto:mathilde.maitrot@york.ac.uk))  
731 reviewed and edited the manuscript. AA ([israabd@gmail.com](mailto:israabd@gmail.com)) guided the data collection and  
732 analysis. All authors read and approved the final version of the manuscript.

## 733 **Competing Interest**

1  
2  
3 734 The authors declare that they have no conflicts of interest.  
4  
5

6 735 **Consent for publication**  
7  
8

9  
10 736 Participants provided consent to publish their quotes anonymously or using pseudonyms.  
11  
12

13 737  
14  
15  
16  
17  
18  
19  
20  
21  
22  
23  
24  
25  
26  
27  
28  
29  
30  
31  
32  
33  
34  
35  
36  
37  
38  
39  
40  
41  
42  
43  
44  
45  
46  
47  
48  
49  
50  
51  
52  
53  
54  
55  
56  
57  
58  
59  
60

For peer review only

## Reference List

- 1  
2  
3 738  
4  
5 739  
6  
7 740 (1) El AS, Christou A, Reichenbach L, Osman FA, Azad K, Islam KS et al. Community-based  
8 741 approaches and partnerships: innovations in health-service delivery in Bangladesh. *Lancet* 2013;  
9 742 382(9909):2012-2026.
- 11 743 (2) Chowdhury AM, Bhuiya A, Chowdhury ME, Rasheed S, Hussain Z, Chen LC. The Bangladesh  
12 744 paradox: exceptional health achievement despite economic poverty. *Lancet* 2013;  
13 745 382(9906):1734-1745.
- 16 746 (3) MOHFP GoB. Health population and nutrition sector strategic plan (HPNSSP) : 2011-2016. 3rd  
17 747 ed. Dhaka: Planning Wing, Ministry of Health and Family Welfare, Government of the People's  
18 748 Republic of Bangladesh; 2010.
- 20 749 (4) Asaduzzaman A. The "Pariah" people: an ethnography of the urban sweepers in Bangladesh. The  
21 750 University Press; 2001.
- 24 751 (5) Sultana H, Subedi DB. caste system and resistance: the case of untouchable hindu sweepers in  
25 752 Bangladesh. *Int J Polit Cult Soc* 2015;1-14.
- 27 753 (6) International Dalit Solidarity Network (IDSN). Working globally against discrimination based on  
28 754 work and descent. Copenhagen: IDSN; 2013. 1-51.
- 30 755 (7) Islam F. political participation of Dalit women in Dhaka city, Bangladesh. Dhaka: 2007.
- 32 756 (8) Social, economic and cultural status of dalit community in Bangladesh. 2018.  
33 757 Ref Type: Report
- 35 758 (9) Chowdhury IU. Caste-based Discrimination in South Asia: A Study of Bangladesh. New Delhi:  
36 759 Indian Institute of Dalit Studies; 2009.
- 39 760 (10) Islam M, Parvez A. Dalit Initiatives in Bangladesh. Dhaka: Nagorik Uddyog & Bangladesh Dalit  
40 761 and Excluded Rights Movement; 2013.
- 42 762 (11) Roy RK. Assessment of Nutritional Status and Its Determinants Among Pre-School Children  
43 763 Within Dalit Communities of Jessore City in Bangladesh: A Cross-Sectional Study. *Age* 2018;  
44 764 24(35):43.
- 46 765 (12) National Institute of Population Research and Training (NIPORT), Mitra and Associates, ICF  
47 766 International. Bangladesh Demographic and Health Survey:2014. 1-66. 2014. Dhaka,  
48 767 Bangladesh.  
49 768 Ref Type: Report
- 52 769 (13) The Life and Days of (Dalit) Sweepers in Bangladesh. The Daily Star 2006.
- 54 770 (14) Lundberg O. Causal explanation for class inequality in health - An empirical analysis. *Social Science*  
55 771 *& Medicine* 1991; 32(4):385-393.

- 1  
2  
3 772 (15) Davidson R, Mitchell R, Hunt K. Location, location, location: the role of experience of  
4 773 disadvantage in lay perceptions of area inequalities in health. *Health Place* 2008; 14(2):167-181.  
5  
6 774 (16) Gwatkin DR, Bhuiya A, Victora CG. Making health systems more equitable. *Lancet* 2004;  
7 775 364(9441):1273-1280.  
8  
9 776 (17) Graham H. Social determinants and their unequal distribution: Clarifying policy understanding.  
10 777 *The Maibank Quarterly* 2004; 82(1):101-124.  
11  
12 778 (18) Davidson R, Kitzinger J, Hunt K. The wealthy get healthy, the poor get poorly? Lay perceptions of  
13 779 health inequalities. *Soc Sci Med* 2006; 62(9):2171-2182.  
14  
15 780 (19) Ahmed SM, Adams AM, Chowdhury M, Bhuiya A. Gender, socioeconomic development and  
16 781 health-seeking behaviour in Bangladesh. *Soc Sci Med* 2000; 51(3):361-371.  
17  
18 782 (20) Solar O, Irwin A. A conceptual framework for action on the social determinants of health: Social  
19 783 Determinants of Health Discussion Paper 2 (Policy and Practice). Geneva Switzerland World  
20 784 Health Organization [WHO] 2010.; 2007.  
21  
22 785 (21) Krieger N. Theories for social epidemiology in the 21st century: an ecosocial perspective. *Int J*  
23 786 *Epidemiol* 2001; 30(4):668-677.  
24  
25 787 (22) Marmot M, Wilkinson RG. Psychosocial and material pathways in the relation between income  
26 788 and health: a response to Lynch et al. *BMJ* 2001; 322(7296):1233-1236.  
27  
28 789 (23) Smith GD, Egger M. Commentary: understanding it all--health, meta-theories, and mortality  
29 790 trends. *BMJ* 1996; 313(7072):1584-1585.  
30  
31 791 (24) Wilkinson RG, Pickett KE. Income inequality and population health: a review and explanation of  
32 792 the evidence. *Soc Sci Med* 2006; 62(7):1768-1784.  
33  
34 793 (25) Anderson C. Presenting and evaluating qualitative research. *Am J Pharm Educ* 2010; 74(8):141.  
35  
36 794 (26) Patton MQ. *Qualitative Research and Evaluation Methods*, 209-339. Thousand Oaks, CA: Sage.  
37 795 *Un estudio cualitativo*; 2002.  
38  
39 796 (27) Guest G, Bunce A, Johnson L. How many interviews are enough? An experiment with data  
40 797 saturation and variability. *Field Methods* 2006; 18(1):59-82.  
41  
42 798 (28) Abbas T, Charles T. *Handbook of mixed methods in social & behavioral research*. Sage  
43 799 Publications, Thousand Oaks; 2003.  
44  
45 800 (29) Miles MB, Huberman AM. *Qualitative data analysis: A sourcebook*. Beverly Hills: Sage  
46 801 Publications 1994.  
47  
48 802 (30) Kumar Saha C. Dynamics of Risk Determinants Regarding Diarrhea Affected Slum Children in  
49 803 Urban Dhaka: A Dysfunctional Health Care System. *Current Research Journal of Social Sciences*  
50 804 2012; 4:304-313.  
51  
52  
53  
54  
55  
56  
57  
58  
59  
60



- 1  
2  
3 805 (31) Evans T, Whitehead M, Diderichsen F, Bhuiya A, Wirth M. Challenging Inequities in Health : From  
4 806 Ethics to Action. *Oxford UP* 2001.  
5  
6 807 (32) Islam A, Biswas T. Health system in Bangladesh: Challenges and opportunities. *American Journal*  
7 808 *of Health Research* 2014; 2(6):366-374.  
8  
9 809 (33) Hankivsky O. Intersectionality 101. The Institute for Intersectionality Research & Policy, SFU;  
10 810 2014.  
11  
12 811 (34) Cairney J, Veldhuizen S, Vigod S, Streiner DL, Wade TJ, Kurdyak P. Exploring the social  
13 812 determinants of mental health service use using intersectionality theory and CART analysis. *J*  
14 813 *Epidemiol Community Health* 2014; 68(2):145-150.  
15  
16 814 (35) Patil RR. Caste-, work-, and descent-based discrimination as a determinant of health in social  
17 815 epidemiology. *Soc Work Public Health* 2014; 29(4):342-349.  
18  
19 816 (36) Seng JS, Lopez WD, Sperlich M, Hamama L, Reed Meldrum CD. Marginalized identities,  
20 817 discrimination burden, and mental health: empirical exploration of an interpersonal-level  
21 818 approach to modeling intersectionality. *Soc Sci Med* 2012; 75(12):2437-2445.  
22  
23 819 (37) Mohindra KS, Haddad S, Narayana D. Women's health in a rural community in Kerala, India: do  
24 820 caste and socioeconomic position matter? *J Epidemiol Community Health* 2006; 60(12):1020-  
25 821 1026.  
26  
27 822 (38) Nayar KR. Social exclusion, caste & health: a review based on the social determinants  
28 823 framework. *Indian J Med Res* 2007; 126(4):355-363.  
29  
30 824 (39) Agarwal S, Srivastava A. Social determinants of children's health in urban areas in India. *J Health*  
31 825 *Care Poor Underserved* 2009; 20(4 Suppl):68-89.  
32  
33 826 (40) Vart P, Jaglan A, Shafique K. Caste-based social inequalities and childhood anemia in India:  
34 827 results from the National Family Health Survey (NFHS) 2005-2006. *BMC Public Health* 2015;  
35 828 15:537.  
36  
37 829 (41) Baral SC, Karki DK, Newell JN. Causes of stigma and discrimination associated with tuberculosis  
38 830 in Nepal: a qualitative study. *BMC Public Health* 2007; 7:211.  
39  
40 831 (42) Kurian NJ. Widening economic & social disparities: implications for India. *Indian J Med Res* 2007;  
41 832 126(4):374-380.  
42  
43 833 (43) Sabharwal SN, Sharma S, Diwakar G D, Naik AK. Caste discrimination as a factor in poor access to  
44 834 public health service system: a case study of janani suraksha yojana scheme. *Journal of Social*  
45 835 *Inclusion Studies* 2014; 1(1):148-168.  
46  
47 836 (44) WHO. A Conceptual Framework for Action on the Social Determinants of Health: Discussion  
48 837 paper for the Commission on Social Determinants of Health: DRAFT. 2007.  
49  
50 838 (45) Soor W, Man D, Ndiaye P, Dkhimi F, van de Pas R, Criel B. Towards universal coverage in the  
51 839 majority world: Transversal findings & lessons learnt, a summary. Antwerp, Belgium: ITG; 2015.  
52  
53  
54  
55  
56  
57  
58  
59  
60

- 1  
2  
3 840 (46) Kabir A, Farhana N, Akter F, Jesmin S, Ali A. Sweeping practices, perceptions and knowledge  
4 841 about occupational safety and health hazards of street sweepers in Dhaka city, Bangladesh: a  
5 842 qualitative inquiry . *Int J Community Med Public Health* 2015; 2(3):237-243.  
6  
7 843 (47) Bambra C, Gibson M, Sowden A, Wright K, Whitehead M, Petticrew M. Tackling the wider social  
8 844 determinants of health and health inequalities: evidence from systematic reviews. *J Epidemiol  
9 845 Community Health* 2010; 64(4):284-291.  
10  
11 846 (48) Desai S, Dubey A. Caste in 21st Century India: Competing Narratives. *Econ Polit Wkly* 2012;  
12 847 46(11):40-49.  
13  
14 848 (49) Health System of Bangladesh. Online resource [ 2014 [cited 2014 May 23]; Available from:  
15 849 URL:<http://www.bangladesh.gov.bd/?q=en/health-care-systems-bangladesh>  
16  
17 850 (50) Wilkinson RG. Socioeconomic determinants of health. Health inequalities: relative or absolute  
18 851 material standards? *BMJ* 1997; 314(7080):591-595.  
19  
20 852 (51) Borooah VK. Inequality in health outcomes in India: The role of caste and religion. 2010.  
21  
22 853 (52) Sen G, Iyar A, George A. Systematic hierarchies and Systemic failures: Gender and Health  
23 854 Inequities in Koppal District. 2006.  
24  
25 855 (53) Johnston HB. Addressing social exclusion: analyses from South Asia and southern Africa. *J Health  
26 856 Popul Nutr* 2009; 27(4):423-425.  
27 857  
28  
29  
30  
31  
32 858  
33  
34  
35  
36  
37  
38  
39  
40  
41  
42  
43  
44  
45  
46  
47  
48  
49  
50  
51  
52  
53  
54  
55  
56  
57  
58  
59  
60

1  
2  
3  
4  
5  
6  
7  
8  
9  
10  
11  
12  
13  
14  
15  
16  
17  
18  
19  
20  
21  
22  
23  
24  
25  
26  
27  
28  
29  
30  
31  
32  
33  
34  
35  
36  
37  
38  
39  
40  
41  
42  
43  
44  
45  
46  
47  
48  
49  
50  
51  
52  
53  
54  
55  
56  
57  
58  
59  
60

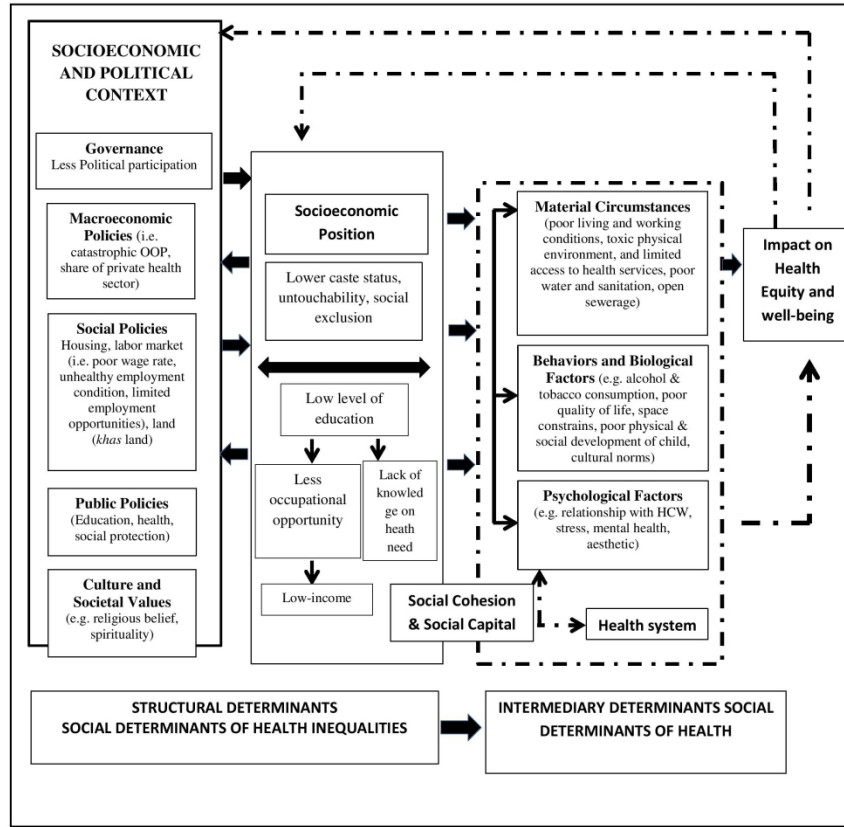

215x279mm (300 x 300 DPI)

## Standards for Reporting Qualitative Research (SRQR)\*

Page/line no(s).

|                                                                                                                                                                                                                                                                                                                                                                                                                                                                                                                                                                                                                                                                                                                                                                                                                                                                                                                                                                                                                                                                                                                                                                                                                                                                                                                                                                                                                                                                                                                                                                                                 |  |
|-------------------------------------------------------------------------------------------------------------------------------------------------------------------------------------------------------------------------------------------------------------------------------------------------------------------------------------------------------------------------------------------------------------------------------------------------------------------------------------------------------------------------------------------------------------------------------------------------------------------------------------------------------------------------------------------------------------------------------------------------------------------------------------------------------------------------------------------------------------------------------------------------------------------------------------------------------------------------------------------------------------------------------------------------------------------------------------------------------------------------------------------------------------------------------------------------------------------------------------------------------------------------------------------------------------------------------------------------------------------------------------------------------------------------------------------------------------------------------------------------------------------------------------------------------------------------------------------------|--|
| <p><b>Title</b> - Qualitative exploration of socio-cultural determinants of health inequities of Dalit population in Bangladesh</p>                                                                                                                                                                                                                                                                                                                                                                                                                                                                                                                                                                                                                                                                                                                                                                                                                                                                                                                                                                                                                                                                                                                                                                                                                                                                                                                                                                                                                                                             |  |
| <p><b>Abstract</b><br/>         Dalits (<i>jaat</i> sweepers), a marginalised traditional working community, have relatively poor access to healthcare services. This study sought to explore the socio-political and cultural factors associated with health inequalities among Dalits in an urban setting.<br/>         An exploratory qualitative study design was adopted. The acquired data was analysed using an iterative approach which incorporated deductive and inductive methods in identifying codes and themes.<br/>         This study was conducted in two sweeper communities in Dhaka city. Participants were Dalit men and women (fourteen in-depth interviews, mean age±SD 30±10; and five focus group discussions), and the community leaders and NGO workers (seven key informant interviews).<br/>         Dalits (untouchables) are typically considered to fall outside the caste-based social structure and existing vulnerabilities are embedded and reinforced by this identity. Dalits' experience of precarious access to healthcare or poor healthcare is an important manifestation of these inequalities and has implications for the economic and social life of Dalit populations living together in geographically constrained spaces.<br/>         A better understanding of the precise influences of socio-cultural determinants of health inequalities is needed, together with the identification of the strategies and programmes needed to address these determinants with the aim of developing more inclusive health service delivery systems.</p> |  |

### Introduction

|                                                                                                                                                                                                                                                                                                                                                                                                                                                                                                                                                                                                                                                                                                                                                                                                                                                                                                   |  |
|---------------------------------------------------------------------------------------------------------------------------------------------------------------------------------------------------------------------------------------------------------------------------------------------------------------------------------------------------------------------------------------------------------------------------------------------------------------------------------------------------------------------------------------------------------------------------------------------------------------------------------------------------------------------------------------------------------------------------------------------------------------------------------------------------------------------------------------------------------------------------------------------------|--|
| <p><b>Problem formulation</b> – In recent years Bangladesh has achieved remarkable progress in terms of health targets. However, these advances are experienced unequally across the population, often leaving behind individuals and communities that are economically marginalised and socially excluded. Improved health services, especially those provided by the state, are not yet effectively distributed to all individuals and groups, and frequently fail to reach ethnic minorities, people living in remote areas, extremely poor individuals, slum and pavement dwellers, and other marginalised groups. Several studies in Bangladesh have highlighted the socio-economic issues and discrimination encountered by the Dalit population; however, the socio-political and cultural factors that contribute to generating severe health inequalities remain largely unexplored.</p> |  |
| <p><b>Purpose or research question</b> – To explore the political, social, economic, and cultural determinants of health inequalities experienced by the majority of the Dalit population.</p>                                                                                                                                                                                                                                                                                                                                                                                                                                                                                                                                                                                                                                                                                                    |  |

## Methods

|                                                                                                                                                                                                                                                                                                                                                                                                                                                                                                                                                                                                                                                                                                                                                                                                                                        |  |
|----------------------------------------------------------------------------------------------------------------------------------------------------------------------------------------------------------------------------------------------------------------------------------------------------------------------------------------------------------------------------------------------------------------------------------------------------------------------------------------------------------------------------------------------------------------------------------------------------------------------------------------------------------------------------------------------------------------------------------------------------------------------------------------------------------------------------------------|--|
| <p><b>Qualitative approach and research paradigm</b> – We adopted a qualitative approach (phenomenological). ‘Commission on Social Determinants of Health (CSDH) Conceptual Framework’ proposed by the World Health Organization (WHO) in 2010 guided our analysis.</p>                                                                                                                                                                                                                                                                                                                                                                                                                                                                                                                                                                |  |
| <p><b>Researcher characteristics and reflexivity</b> – Three researchers graduated in anthropology and public health conducted interviews, performed analysis, report the finding. The researchers have a vast experience in qualitative research. We adhered to the trustworthiness by applying four principles—credibility, transferability, conformability, and dependability. We used inter-coder or synchronic reliability that refers to the amount of agreement between independent coders of the data. We measured the agreement during the analysis when the researchers’ coded same interviews independently. We furthermore performed triangulation between methods, and participants.”</p>                                                                                                                                 |  |
| <p><b>Context</b> – This study was conducted in two sweeper communities in Dhaka city: the <i>Agargaon</i> Public Works Department (PWD) Sweeper Colony, and the Ganaktuli sweeper colony located in the city’s Hazaribagh area. Commonly, the sweepers in Agargaon and Ganakatuli are known as <i>Telegu</i> and <i>Kanpuri</i>, respectively. There are no official statistics providing precise population figures for these colonies, although secondary sources indicate that each includes approximately 1,000 families</p>                                                                                                                                                                                                                                                                                                      |  |
| <p><b>Sampling strategy</b> - Using several data collection tools we achieved maximum variation within the sample, purposefully collecting data from participants with various backgrounds, e.g. differing in terms of age, occupation, gender, position within the household, status within the community (leaders), and members of non-governmental organisations (NGOs, henceforth)</p>                                                                                                                                                                                                                                                                                                                                                                                                                                             |  |
| <p><b>Ethical issues pertaining to human subjects-</b> The study protocol was approved and ethical approval was obtained from the ‘ethics review committee’ at Dhaka University, Bangladesh. Written informed consent was taken and documented via audio recording. Before obtaining consent the research objectives were explained, together with the importance of the study, confidentiality rules, possible harms and benefits, and the participants’ right to withdraw from the interviews at any stage during the conversation. Confidentiality of the personal identification of all participants was strictly maintained, with these details only being used by the researchers. Data was analysed using the participant identification (ID) number only and these ID number were removed prior to reporting the findings.</p> |  |
| <p><b>Data collection methods</b> - Qualitative data was collected using 14 in-depth interviews with Dalit men and women, 5 focus group discussions with people from the Dalit community, and 7 key informant interviews. The acquired data was analysed using an iterative approach which incorporated deductive and inductive methods in identifying codes and themes.</p>                                                                                                                                                                                                                                                                                                                                                                                                                                                           |  |
| <p><b>Data collection instruments and technologies</b> – We used three data collection tools—in-depth interview (IDI), focus group discussion (FGD), and key informant interview (KII). We maintained maximum variation within the sample as we used purposive sampling to select the participants on the basis of key variables including age, gender and occupation.</p>                                                                                                                                                                                                                                                                                                                                                                                                                                                             |  |

|                                                        |                                                                                                                                                                                                                                                                                                                                                                                                                                                                                                                                                                                                                                                                                                                                                        |  |
|--------------------------------------------------------|--------------------------------------------------------------------------------------------------------------------------------------------------------------------------------------------------------------------------------------------------------------------------------------------------------------------------------------------------------------------------------------------------------------------------------------------------------------------------------------------------------------------------------------------------------------------------------------------------------------------------------------------------------------------------------------------------------------------------------------------------------|--|
| 1<br>2<br>3                                            | <b>Units of study</b> – Socio demographic and contextual characteristics were explained to provide a deeper understanding of the phenomena. Individual health seeking experience was described accordingly.                                                                                                                                                                                                                                                                                                                                                                                                                                                                                                                                            |  |
| 4<br>5<br>6<br>7                                       | <b>Data processing</b> - The analysis process was adequately accomplished by the team of researchers, who have different educational backgrounds and training, through regular collaboration and discussions, self-reflexivity, and triangulation of method and context (field sites), ensuring that no one researcher’s view was predominant.                                                                                                                                                                                                                                                                                                                                                                                                         |  |
| 8<br>9<br>10<br>11<br>12<br>13<br>14<br>15<br>16<br>17 | <b>Data analysis</b> - To analyse the qualitative data we used an iterative approach which blended deductive and inductive methods to identify and generate codes and themes. Initially, a deductive approach was used through the use of interview guides, which provided a primary template for the framework of data coding. The researchers independently read and reread a few transcripts and identified codes which were incorporated into the coding framework in an inductive form which mirrored the ideas, perceptions, practices, and concepts, concentrating on the health and health services of the participants. After coding all of the interviews we looked for clusters of several codes, which were termed ‘themes’ or ‘concepts’. |  |
| 18<br>19<br>20<br>21<br>22<br>23<br>24                 | <b>Techniques to enhance trustworthiness</b> - “In this study, we adhered to the trustworthiness by applying four principles—credibility, transferability, conformability, and dependability. We used inter-coder or synchronic reliability that refers to the amount of agreement between independent coders of the data. We measured the agreement during the analysis when the researchers’ coded same interviews independently. We furthermore performed triangulation between methods, and participants.”                                                                                                                                                                                                                                         |  |

## Results/findings

|                                                                            |                                                                                                                                                                                                                                                                                                                                                                                                                                                                                                                                                                                                           |  |
|----------------------------------------------------------------------------|-----------------------------------------------------------------------------------------------------------------------------------------------------------------------------------------------------------------------------------------------------------------------------------------------------------------------------------------------------------------------------------------------------------------------------------------------------------------------------------------------------------------------------------------------------------------------------------------------------------|--|
| 25<br>26<br>27<br>28<br>29<br>30<br>31<br>32<br>33<br>34<br>35<br>36<br>37 | <b>Synthesis and interpretation</b> - The health status of members of these Dalit groups is determined by an array of social, economic and political factors. As Dalits (untouchables) are typically considered to fall outside the caste-based social structure and existing vulnerabilities are embedded and reinforced by this identity. Dalits’ experience of precarious access to healthcare or poor healthcare is an important manifestation of these inequalities and has implications for the economic and social life of Dalit populations living together in geographically constrained spaces. |  |
| 38<br>39<br>40<br>41                                                       | <b>Links to empirical data</b> – quotes were used in the result sections where it suits best.                                                                                                                                                                                                                                                                                                                                                                                                                                                                                                             |  |

## Discussion

|                                                    |                                                                                                                                                                                                                                                                                                                                                                                                                                                                                                                                                                               |  |
|----------------------------------------------------|-------------------------------------------------------------------------------------------------------------------------------------------------------------------------------------------------------------------------------------------------------------------------------------------------------------------------------------------------------------------------------------------------------------------------------------------------------------------------------------------------------------------------------------------------------------------------------|--|
| 42<br>43<br>44<br>45<br>46<br>47<br>48<br>49<br>50 | <b>Integration with prior work, implications, transferability, and contribution(s) to the field</b> - The provision of clinical healthcare services alone is insufficient to mitigate the negative effects of discriminations and to improve the health status of Dalits. A better understanding of the precise influences of socio-cultural determinants of health inequalities is needed, together with the identification of the strategies and programmes needed to address these determinants with the aim of developing more inclusive health service delivery systems. |  |
| 51<br>52<br>53<br>54<br>55<br>56<br>57             | <b>Limitations</b> - The results of this study are based on data collected from the Dalit population in Dhaka City; therefore, the results may not be transferable to other settings, for example a small Bangladeshi town. Nonetheless, considering the data collected, we believe that this study provides an in-depth understanding of a set of social, cultural, economic and political factors that strongly determine the health outcomes of Dalits.                                                                                                                    |  |

1  
2  
3  
4  
5  
6  
7  
8  
9  
10  
11  
12  
13  
14  
15  
16  
17  
18  
19  
20  
21  
22  
23  
24  
25  
26  
27  
28  
29  
30  
31  
32  
33  
34  
35  
36  
37  
38  
39  
40  
41  
42  
43  
44  
45  
46  
47  
48  
49  
50  
51  
52  
53  
54  
55  
56  
57  
58  
59  
60

**Other**

|                                                                                             |  |
|---------------------------------------------------------------------------------------------|--|
| <b>Conflicts of interest</b> - The authors declare that they have no conflicts of interest. |  |
| <b>Funding</b> - This study received no funding from any sources.                           |  |

For peer review only

# BMJ Open

## Qualitative exploration of socio-cultural determinants of health inequities of Dalit population in Dhaka City, Bangladesh

|                                 |                                                                                                                                                                                           |
|---------------------------------|-------------------------------------------------------------------------------------------------------------------------------------------------------------------------------------------|
| Journal:                        | <i>BMJ Open</i>                                                                                                                                                                           |
| Manuscript ID                   | bmjopen-2018-022906.R2                                                                                                                                                                    |
| Article Type:                   | Research                                                                                                                                                                                  |
| Date Submitted by the Author:   | 31-Aug-2018                                                                                                                                                                               |
| Complete List of Authors:       | Kabir, Ashrafal; Dushtha Shasthya Kendra , Research Maitrot, Mathilde ; The University of York, Department of Social Policy and Social Work<br>Ali, Ahsan; Dhaka University, Anthropology |
| <b>Primary Subject Heading</b>: | Public health                                                                                                                                                                             |
| Secondary Subject Heading:      | Health services research, Health policy, Qualitative research                                                                                                                             |
| Keywords:                       | caste, Dalit, qualitative method, sociocultural determinants, health inequalities, untouchability                                                                                         |
|                                 |                                                                                                                                                                                           |

SCHOLARONE™  
Manuscripts



1  
2  
3 1 Qualitative exploration of socio-cultural determinants of health inequities of Dalit  
4 population in Dhaka City, Bangladesh  
5

6  
7 3 **Short Title: Socio-cultural determinants of health inequities: Dalit population,**  
8  
9 4 **Bangladesh**  
10

11  
12  
13 5 Ashraful Kabir,<sup>13\*</sup>,  
14

15  
16 6 Email: [ashraful.icddrb@gmail.com](mailto:ashraful.icddrb@gmail.com)  
17

18  
19 7 Mathilde Rose Louise Maitrot,<sup>2</sup>  
20

21  
22 8 Email: [Mathilde.maitrot@york.ac.uk](mailto:Mathilde.maitrot@york.ac.uk)  
23

24  
25 9 Ahsan Ali<sup>3</sup>  
26

27  
28 10 Email: [israabd@gmail.com](mailto:israabd@gmail.com)  
29

30  
31 11 <sup>1</sup>Dushtha Shasthya Kendra, Dhaka, Bangladesh  
32

33  
34 12 <sup>2</sup>Department of Social Policy and Social Work, The University of York, United Kingdom  
35

36  
37 13 <sup>3</sup>Department of Anthropology, Dhaka University, Bangladesh  
38

39  
40 14 **\*Corresponding author**  
41

42  
43 15 Email: [ashraful.icddrb@gmail.com](mailto:ashraful.icddrb@gmail.com)  
44  
45  
46  
47  
48  
49  
50  
51  
52  
53  
54  
55  
56  
57  
58  
59  
60

## 16 ABSTRACT

17 **Objectives:** In recent years Bangladesh has made remarkable advances in health outcomes;  
18 however, the benefits of these gains are unequally shared amongst citizens and population  
19 groups. Dalits (*jaat* sweepers), a marginalised traditional working community, have relatively  
20 poor access to healthcare services. This study sought to explore the socio-political and cultural  
21 factors associated with health inequalities among Dalits in an urban setting.

22 **Design:** An exploratory qualitative study design was adopted. The acquired data was analysed  
23 using an iterative approach which incorporated deductive and inductive methods in identifying  
24 codes and themes.

25 **Settings:** This study was conducted in two sweeper communities in Dhaka city.

26 **Participants:** Participants were Dalit men and women (fourteen in-depth interviews, mean  
27 age $\pm$ SD 30 $\pm$ 10; and five focus group discussions), and the community leaders and NGO workers  
28 (seven key informant interviews).

29 **Results:** The health status of members of these Dalit groups is determined by an array of social,  
30 economic and political factors. Dalits (untouchables) are typically considered to fall outside the  
31 caste-based social structure and existing vulnerabilities are embedded and reinforced by this  
32 identity. Dalits' experience of precarious access to healthcare or poor healthcare is an important  
33 manifestation of these inequalities and has implications for the economic and social life of Dalit  
34 populations living together in geographically constrained spaces.

35 **Conclusions:** The provision of clinical healthcare services alone is insufficient to mitigate the  
36 negative effects of discriminations and to improve the health status of Dalits. A better

1  
2  
3 37 understanding of the precise influences of socio-cultural determinants of health inequalities is  
4  
5 38 needed, together with the identification of the strategies and programmes needed to address these  
6  
7  
8 39 determinants with the aim of developing more inclusive health service delivery systems.  
9

10  
11 40 **Key Words:** Bangladesh; caste; Dalit; qualitative method; sociocultural determinants; health  
12  
13 41 inequalities; social exclusion; untouchability  
14  
15

## 16 42 **Strengths and limitations of this study**

- 19 43 • This study used the ‘Commission on Social Determinants of Health Conceptual  
20  
21 44 Framework’ proposed by the World Health Organization (WHO) which allow us to  
22  
23 45 investigate how a set of social, cultural, economic and political elements interact and play  
24  
25  
26 46 a determining role in shaping Dalits’ health status.
- 28 47 • To the best of our knowledge this is the first study that comprehensively examines how  
29  
30 48 socio-cultural and political elements are interconnected, and how they produce, sustain,  
31  
32 49 and reinforce health inequality among the Dalit population in Bangladesh.
- 35 50 • To analyse the qualitative data we used an iterative approach which blended deductive  
36  
37 51 and inductive methods to identify and generate codes and themes.
- 40 52 • The main limitation is that the sample size is unavoidably small; therefore, the  
41  
42 53 generalizability of the findings to other areas might be limited due to the contextual  
43  
44 54 characteristics. Nonetheless, considering the data collected, we believe that this study  
45  
46 55 provides an in-depth understanding of the determinants of health inequalities among Dalit  
47  
48 56 population in Bangladesh.  
49

50  
51  
52 57  
53  
54  
55  
56  
57  
58  
59  
60

## 58 BACKGROUND

59 In recent years Bangladesh has achieved remarkable progress in terms of health targets, with  
60 declining maternal and neonatal mortality rates, increased immunisation coverage, greater life  
61 expectancy at birth, and increased vitamin A supplementation<sup>1;2</sup>. However, these advances are  
62 experienced unequally across the population, often leaving behind individuals and communities  
63 that are economically marginalised and socially excluded. Improved health services, especially  
64 those provided by the state, are not yet effectively distributed to all individuals and groups, and  
65 frequently fail to reach ethnic minorities, people living in remote areas, extremely poor  
66 individuals, slum and pavement dwellers, and other marginalised groups<sup>3</sup>. This paper focuses on  
67 analysing the healthcare barriers experienced by one marginalised group, the Dalits, the  
68 untouchables.

69 Bob et al.<sup>4</sup> explain that the word 'Dalit' comes from the Marathi language and means  
70 suppressed, 'broken up', downtrodden or oppressed, and the term was first used by Dr B. R.  
71 Ambedkar during the late period of British colonial rule. The Dalits of Bangladesh are a  
72 marginalised group whose identity is often characterised by the manual and low-status nature of  
73 their occupations. This identity and social status are strongly associated with their ancestral  
74 occupations, which were typically considered unclean and impure. In the 1872 census conducted  
75 in Bengal, the majority of Dalits were referred to by the term *Chandala*, a Sanskrit word for  
76 someone who deals with the disposal of corpses, a Hindu outcaste. In 2017 they are often called  
77 *Harijan*, a term coined by Mahatma Gandhi meaning 'children of God', or more commonly  
78 referred to by their occupation, family descent, ethnicity, or derogatory terms. The dalits often  
79 engage in sweeping activities, such as cleaning latrines, removing rubbish, skinning cattle, and

1  
2  
3 80 sweeping streets and houses. They scavenge in Bangladesh's cities and towns, and are  
4  
5 81 designated as 'untouchable' within the caste system of the Indian subcontinent<sup>5,6</sup>.

6  
7  
8 82 Healthcare issues of the Dalit population in Bangladesh remain largely neglected in the national  
9  
10  
11 83 government's development agenda<sup>7,8</sup>, despite its strong constitutional commitment to 'not  
12  
13 84 discriminate against any citizen on grounds only of religion, race, caste, sex or place of birth'  
14  
15 85 (The Bangladesh Constitution of 1972, Article 28 (1). Although available literature<sup>9-11</sup> (i.e.  
16  
17 86 Bangladesh Demographic and Health Survey, Bangladesh Urban Health Survey) does not  
18  
19 87 present nationally representative demographic and survey data to demonstrate how extend the  
20  
21 88 healthcare access, and health and nutritional outcomes differ statistically between Dalit and other  
22  
23 89 non-Dalit population in Dhaka city, some study reports indicate that Dalit have poor health  
24  
25 90 outcome across the population in slum and other settings<sup>12-15</sup>. For example, Nagorik Uddyog  
26  
27 91 (Bangladesh Dalit and Excluded Rights Movement) notes:

28  
29  
30  
31  
32 92 *"Health surveys and research programmes undertaken with respect to the 'public health*  
33  
34 93 *situation' in the country do not pay special attention to the child and maternal health*  
35  
36 94 *conditions in the colonies and settlements where Dalit communities live. Because of this*  
37  
38 95 *non-attention to their specific health situation, their suffering and specific requirements*  
39  
40 96 *to access non-discriminatory and affordable health care remain unreported and*  
41  
42 97 *unattended to."*<sup>15</sup>

43  
44  
45  
46  
47 98 . Chowdhury reported that Dalit are generally afflicted by skin diseases, diarrhea, tuberculosis,  
48  
49 99 pneumonia at a higher level than the non-Dalit population<sup>13</sup>. Islam et al.<sup>14</sup> reported that water-  
50  
51 100 borne disease are highly prevalent among Dalit population as water and sanitation facilities is  
52  
53 101 scarce in the slum— with reports of nearly 12,000 Dalit sharing two water points in Dhaka, and

1  
2  
3 102 nearly 58% of Dalit have no access to sanitary latrine<sup>13</sup>. A study conducted outside the capital  
4  
5 103 city, found that in a Dalit community in Jessore city around half of pre-school children were  
6  
7 104 suffering from chronic stunted (58%) and underweight (45%), while nationally the  
8  
9 105 corresponding figure is 36% and 33%<sup>12;16</sup>. While no precise official statistics are available  
10  
11 106 regarding the number of Dalits, various sources estimate the population at around 5.5 million<sup>17</sup>,  
12  
13 107 approximately 3-4% of Bangladesh's total population. The lack of official data on this  
14  
15 108 population group indicates the lack of political will to recognise Dalits and the existence of these  
16  
17 109 communities in Bangladesh.  
18  
19  
20  
21

22 110 Prior studies indicate that health inequalities are determined by broader societal factors, such as  
23  
24 111 socio-economic position, housing conditions, working environment, poverty, access to and  
25  
26 112 control of resources, education, and employment<sup>18-22</sup>. A firm understanding of sociocultural  
27  
28 113 determinants of health inequalities, and also of the factors which restrict access to health  
29  
30 114 services, is critical to improving the health outcomes of marginalised communities,<sup>23</sup>. Several  
31  
32 115 studies in Bangladesh have highlighted the socio-economic issues and discrimination  
33  
34 116 encountered by the Dalit population; however, the socio-political and cultural factors that  
35  
36 117 contribute to generating severe health inequalities remain largely unexplored.  
37  
38  
39  
40

41 118 This present study therefore explores the political, social, economic, and cultural determinants of  
42  
43 119 health inequalities experienced by the majority of the Dalit population. We examine how caste-  
44  
45 120 based positions generate and reinforce social stratification in society, and determine health  
46  
47 121 inequities within two Dalit population groups in Bangladesh. We argue that health inequalities  
48  
49 122 need to be viewed from a holistic perspective, keeping in mind the intersecting social, political  
50  
51 123 and structural factors.  
52  
53  
54  
55  
56  
57  
58  
59  
60

124

125

## 126 MATERIALS AND METHODS

### 127 Conceptual Framework

128 Our research was shaped by the ‘Commission on Social Determinants of Health (CSDH)  
129 Conceptual Framework’ proposed by the World Health Organization (WHO) in 2010<sup>24</sup>. This  
130 framework offers a dynamic analytical configuration of the key social institutions and political  
131 structures that affect and shape the health of a population. It explains health status as a social  
132 phenomenon that is produced, configured and sustained through a complex and dynamic  
133 interplay of a set of context-embedded factors. Importantly, it also emphasises the need to  
134 distinguish the mechanisms that generate and reproduce social hierarchies and their multiple  
135 manifestations. The conceptual framework includes three interactive levels of dynamic  
136 influences: the wider socio-political context, individual socio-economic position, and  
137 intermediary socio-economic influences.

138 **Fig 1** Commission on Social Determinants of Health (CSDH) Conceptual Framework [adapted from the  
139 WHO (2010)] [to be placed]

140

141 The first level, the socio-political context, focuses on the social relationships within a society  
142 which organise and configure hierarchies and social stratification by defining individual  
143 positions and roles. This includes the labour market, the educational system, and political  
144 institutions. The second level considers individual or groups of individuals’ positionality in

1  
2  
3 145 relation to these macro-structures and mechanisms. It understands individual socio-economic  
4  
5 146 position as a function of the degree of exposure to health risks and vulnerabilities that result in  
6  
7 147 differential health outcomes for an individual and/or a population. Key individual socio-  
8  
9 148 economic characteristics include income, education, occupation, level of knowledge and  
10  
11 149 information. Combined with structural elements, these form what is referred to as 'structural  
12  
13 150 determinant'. Thus structural determinants shape patterns of access to resources (for example  
14  
15 151 here, health services) and are rooted in socio-economic institutions, policies and political context  
16  
17 152 that construct, reinforce, and maintain social hierarchies in various social systems, institutions,  
18  
19 153 policies and sociocultural values.  
20  
21  
22  
23

24  
25 154 The intermediary socio-economic context refers to a circumstance whereby an individual and/or  
26  
27 155 group have a distinct experience of materials, behavioural options, psychological supports, and  
28  
29 156 healthcare facilities that consecutively shape specific determinants of health status (intermediary  
30  
31 157 determinants). Therefore, this framework summarises and synthesises the view that social  
32  
33 158 determinants of health inequality are constructed, functioning, and sustained through the act of  
34  
35 159 long causal interceding factors (Figure 1).  
36  
37  
38

39 160 Although other frameworks have been developed to understand the social determinants of health,  
40  
41 161 we found this conceptual framework particularly useful for exploring the dynamic relationships  
42  
43 162 between social structures and political determinants of health inequalities. Several contemporary  
44  
45 163 models, for example the psychosocial, social production of diseases/political economy of health,  
46  
47 164 and the eco-social models, tend to explain disease distribution rather than focusing on the  
48  
49 165 mechanism of disease causation <sup>25-28</sup>. Therefore, in contrast to the WHO model, these  
50  
51 166 frameworks leave contextual and socio-political aspects of health inequalities largely  
52  
53  
54  
55  
56  
57  
58  
59  
60



1  
2  
3 167 unexplored. The results presented in this paper are provided together with an exploration of the  
4  
5 168 socio-economic settings following the CSDH Conceptual Framework.  
6  
7

### 8 9 169 **Study Population and Settings**

10  
11 170 This study was conducted in two sweeper communities in Dhaka city: the *Agargaon* Public  
12  
13 171 Works Department (PWD) Sweeper Colony, which is located adjacent to Dhaka Orthopaedic  
14  
15 172 Hospital, and the Ganaktuli sweeper colony located in the city's Hazaribagh area. Commonly,  
16  
17 173 the sweepers in Agargaon and Ganakatuli are known as *Telegu* and *Kanpuri*, respectively. There  
18  
19 174 are no official statistics providing precise population figures for these colonies, although  
20  
21 175 secondary sources indicate that each includes approximately 1,000 families<sup>17</sup>.  
22  
23  
24  
25

### 26 176 **Sampling Strategy**

27  
28  
29 177 Between August and October 2014 the first author conducted interviews and focus group  
30  
31 178 discussions (FGDs, henceforth) with members of these Dalit *colonies*. We applied an inclusion  
32  
33 179 criterion—that participants were aged 18 and above and volunteered to participate—and  
34  
35 180 purposively recruited the study participants to address the research objectives. In this process, we  
36  
37 181 invited individuals who showed a proactive interest to share their experiences, opinions, and  
38  
39 182 time. Using several data collection tools, we purposefully collected data from participants with  
40  
41 183 various backgrounds (e.g. different age groups, occupations, genders, position within the  
42  
43 184 households, status within the community [leaders], and members of non-governmental  
44  
45 185 organisations [NGOs], henceforth). In this process, we achieved maximum variation among the  
46  
47 186 participants..<sup>29</sup>.  
48  
49  
50  
51  
52

53 187 We conducted 14 in-depth interviews (IDIs, henceforth) with household members from the Dalit  
54  
55 188 community who had sought healthcare in different public and private facilities. We invited  
56  
57  
58  
59

1  
2  
3 189 individuals to open group discussions on health status and health-seeking behaviour, and invited  
4  
5 190 those individuals who showed a proactive interest in the study for interviews (IDIs, FGDs). The  
6  
7  
8 191 context in which the research was conducted required a high degree of iteration and flexibility in  
9  
10 192 order to build coherence and maximise the validity of the data collected. For example, as part of  
11  
12 193 the sampling strategy, a subtype of purposive sampling known as snowballing or chain sampling  
13  
14 194 <sup>30</sup> was used to select individuals who had experienced discrimination of a specific nature or  
15  
16  
17 195 means.

18  
19  
20 196 We also conducted seven key informant interviews (KIIs, henceforth) with community and  
21  
22 197 religious leaders, and also NGO worker, in order to better understand the exclusion process  
23  
24 198 experienced by Dalits in these specific locations. Finally, we conducted five FGDs to help  
25  
26  
27 199 understand communal perceptions and attitudes regarding entitlement to access basic public  
28  
29 200 services. We have selected the key informant on the basis two criteria—information depth (who  
30  
31 201 have rich/depth information about the Dalit health aspect), and voluntary participation (who are  
32  
33 202 willing to participate in the interview voluntarily). In case of selecting FGDs participant we  
34  
35  
36 203 considered age, gender, occupation, and volunteer participation. In addition, the authors used  
37  
38 204 participant observations and informal conversations with some non-Dalit (converted Muslim)  
39  
40 205 individuals who lived in the area to further understand the dynamics at play. Many of these  
41  
42  
43 206 informants operated small businesses (e.g. tea stall, plastic shop, video game shop etc.) within  
44  
45 207 and around the sweeper colonies. Finally, we re-visited the participant groups to triangulate the  
46  
47  
48 208 emerging themes and cross-check the accuracy of the data collected. The data collection process  
49  
50 209 ceased when the authors reached a suitable understanding of the key specific historical, socio-  
51  
52 210 cultural belief systems influencing the process of discrimination, marginalisation and  
53  
54 211 stigmatisation <sup>31;32</sup>.

## 212 **Data Collection Procedure**

213 In order to gather information in a semi-structured and systematic manner, we developed an  
214 interview schedule. This document was used to guide conversations around key dimensions  
215 relevant to our research questions and objectives, including socio-economic, demographic, and  
216 political issues that impact upon health conditions among the Dalit population and/or individuals.  
217 Interviews were semi-structured in order to create a friendly rapport with respondents and leave  
218 sufficient space for other themes to emerge. Open-ended questions were used to explore the  
219 socio-political and economic factors affect their health services. For example, we wanted to learn  
220 more about participants' healthcare-seeking behaviours, experiences when attempting to access  
221 healthcare facilities, health information, and interactions with healthcare workers.

222 We conducted all except one of the interviews and FDGs in Bengali, a language spoken by the  
223 researchers (first author) and most of the participants, while an interpreter was used to interview  
224 elderly Dalit men and women who only spoke Telegu and Hindi. On average, IDIs lasted 45 to  
225 60 minutes and FDGs between 90 and 120 minutes. After obtaining the participants' consent,  
226 IDIs and FDGs were electronically recorded, before being transcribed verbatim and subsequently  
227 translated into English. In some cases, several follow-up visits were made to obtain missing  
228 information, as well as to enable further probing of some issues. In addition, the authors took  
229 detailed field notes during the conversations.

## 230 **Data Analysis**

231 To analyse the qualitative data we used an iterative approach which blended deductive and  
232 inductive methods to identify and generate codes and themes. Initially, a deductive approach was  
233 used through the use of interview guides, which provided a primary template for the framework

1  
2  
3 234 of data coding. The researchers independently read and reread a few transcripts and identified  
4  
5 235 codes which were incorporated into the coding framework in an inductive form which mirrored  
6  
7  
8 236 the ideas, perceptions, practices, and concepts, concentrating on the health and health services of  
9  
10 237 the participants. After coding all of the interviews we looked for clusters of several codes, which  
11  
12 238 were termed ‘themes’ or ‘concepts’. Focusing on rigour-related criteria in qualitative research,  
13  
14 239 such as credibility, transferability, dependability and conformability, a consensus was established  
15  
16 240 by resolving coding differences after discussions among the research team. Throughout the  
17  
18  
19 241 analysis, systematically examined meaningful statements were assigned to the relevant code, and  
20  
21 242 the relationship between the themes was then examined<sup>33</sup>. The analysis process was adequately  
22  
23  
24 243 accomplished by the team of researchers, who have different educational backgrounds and  
25  
26 244 training, through regular collaboration and discussions, self-reflexivity, and triangulation of  
27  
28 245 method and context (field sites), ensuring that no one researcher’s view was predominant.

## 246 **Patient and Public Involvement**

247 In this study we did not involve any patients. However, we purposefully selected men, women  
248 community leaders, and NGO workers for the interviews. We entered the community, built  
249 rapport and invited the participants for the interview following a pre-set inclusion criteria such as  
250 people aged 18 years and above, voluntary participation, and pro-activeness to join in the group  
251 discussion. We used an iterative approach which incorporated deductive and inductive methods  
252 in framing research questions and identifying codes and themes.

## 253 **Ethical Considerations**

254 The study protocol was approved and ethical approval was obtained from the ‘ethics review  
255 committee’ at Dhaka University, Bangladesh. Written informed consent was taken and

documented via audio recording. Before obtaining consent the research objectives were explained, together with the importance of the study, confidentiality rules, possible harms and benefits, and the participants' right to withdraw from the interviews at any stage during the conversation. Personal and households information, including age, sex, education, occupation, marital status, family composition and religion, was collected; however, the confidentiality of the personal identification of all participants was strictly maintained, with these details only being used by the researchers. Data was analysed using the participant identification (ID) number only and these ID number were removed prior to reporting the findings.

## RESULTS

### Characteristics of the Participants

We firstly describe the socio-demographic characteristics of the participants before presenting our results. Table 1 shows the characteristics of the study participants, who ranged in age between 22 and 64, and had a mean age of 30 (SD±10) years. More than half of the participants (9 out of 14) had received no formal schooling, which is far below the national level of over 60%. Overall, participants had received a mean of 2.9 (SD±1.3) years of schooling, and only three had received any education above the primary level.

**Table 1 Socio-demographic backgrounds of the in-depth interview participants (n = 14)**

| Characteristics                  | Study Area |           | Combined |
|----------------------------------|------------|-----------|----------|
|                                  | Agargaon   | Ganaktuli |          |
| Age in years (mean ±SD)          | 27±8       | 3±9       | 30±10    |
| <b>Education</b>                 |            |           |          |
| 1–5 years ( <i>n</i> )           | 1          | 2         | 3        |
| 6–10 years ( <i>n</i> )          | 0          | 2         | 2        |
| No formal schooling ( <i>n</i> ) | 5          | 4         | 9        |
| Schooling in years (mean ± SD)   | 2.6±1.2    | 3.4±1.4   | 2.9±1.3  |

|                                  |   |   |    |
|----------------------------------|---|---|----|
| <b>Occupation (<i>n</i>)</b>     |   |   |    |
| Cleaning                         | 3 | 5 | 8  |
| Housewife                        | 2 | 1 | 3  |
| Others                           | 1 | 2 | 3  |
| <b>Sex (<i>n</i>)</b>            |   |   |    |
| Male                             | 4 | 4 | 8  |
| Female                           | 2 | 4 | 6  |
| <b>Marital Status (<i>n</i>)</b> |   |   |    |
| Married                          | 4 | 5 | 9  |
| Unmarried                        | 2 | 2 | 4  |
| Divorced                         | 0 | 1 | 1  |
| <b>Family Type (<i>n</i>)</b>    |   |   |    |
| Extended                         | 4 | 6 | 10 |
| Nuclear                          | 2 | 2 | 4  |
| <b>Religion (<i>n</i>)</b>       |   |   |    |
| Hindu                            | 5 | 8 | 13 |
| Converted Christian              | 1 | 0 | 1  |

273 The majority of the participants were engaged in cleaning activities for Dhaka City Corporation  
 274 and private organisations, while the remainder were employed in household activities, as day  
 275 labourers, or in garment factories. More than half of the participants (10 out of 14) lived with  
 276 their extended family, and almost all (13 out of 14) were Hindu, with just one participant having  
 277 converted to Christianity.

278 Table 2 presents the key demographic characteristics of the FGD participants. Five FGDs were  
 279 conducted: (I) among 6 Agargaon Dalit men (mean age 28, SD  $\pm$  8 years), (II) among 7  
 280 Agargaon Dalit women (mean age 32, SD  $\pm$  7 years), (III) among 6 Ganaktuli Dalit men (mean  
 281 age 39, SD  $\pm$  7 years), (IV) among 8 female Ganaktuli Dalit women (mean age 24, SD  $\pm$  5  
 282 years) and (V) among 9 Ganaktuli Dalit men (mean age 35, SD  $\pm$  6 years).

283 **Table 2 Socio-demographic backgrounds of participants in the focus group discussions (*n* = 36)**

| Focus group discussion | Age of the participants in years (mean $\pm$ SD) | Location | Number of Participants | Gender |
|------------------------|--------------------------------------------------|----------|------------------------|--------|
|------------------------|--------------------------------------------------|----------|------------------------|--------|

|     |      |           |   |        |
|-----|------|-----------|---|--------|
| I   | 28±8 | Agargaon  | 6 | Male   |
| II  | 32±7 | Agargaon  | 7 | Female |
| III | 39±7 | Ganaktuli | 6 | Male   |
| IV  | 24±5 | Ganaktuli | 8 | Female |
| V   | 35±6 | Ganaktuli | 9 | Male   |

284

285 The dominant recurring themes were organised into categories reflecting the majority of  
 286 interactive elements of the 'social determinants of health' framework (i.e. socio-economic and  
 287 political context [including governance, macroeconomic policies, social and public policies,  
 288 culture and societal values untouchability, caste-based discrimination, and social exclusion]  
 289 socio-economic position and intermediary determinants).

### 290 **Space and Power**

291 In an attempt to contextualise our findings within the wider socio-economic and political context,  
 292 this section starts by providing a brief overview of the political history of the Dalit population.  
 293 Accounts of the socio-political and economic dimensions of Dalit livelihoods helps in  
 294 understanding structural determinants of their health.

295 In Bangladesh, the majority of untouchable Hindu Dalits have Indian origins. In Bangladesh, as  
 296 in India and Nepal, untouchable Hindus belong to the lowest social position at the base of the  
 297 *Varna* system <sup>6</sup>. During the reign of the Mughals, Dhaka was established as the commercial  
 298 capital of the Bengal Subah by *Subahdar* (viceroy) Islam Khan in 1608. As the city grew to  
 299 become one of the wealthiest and most prosperous cities in the South Asian region, the Mughal  
 300 administrator appointed sweepers to maintain sanitation and cleaning activities <sup>5</sup>. In the 1620s  
 301 there was a large-scale migration of Dalit from India to Dhaka, which was precipitated by  
 302 massacres by Burmese pirates in 1624-26: they were required to remove dead bodies from the

1  
2  
3 303 city<sup>8</sup>. It is commonly believed that a large number of Dalits were brought to the city by British  
4  
5 304 colonial administrators after Dhaka gained municipality status, to provide menial services<sup>8</sup>.  
6  
7  
8 305 During the period of British colonial rule (1757-1947), Dalits (Telegu-speaking and Kanpuri  
9  
10 306 sweepers) were brought to East Bengal (now Bangladesh) from the Indian states of Uttar  
11  
12 307 Pradesh, Bihar, Andhra Pradesh and many other areas, including Bhagalpur, Motihari, Baliha,  
13  
14 308 Patna, Maddaparpur, Uriya, Gourakpur and Chapra<sup>5;13</sup>. As the English administration rapidly  
15  
16  
17 309 developed townships and local municipalities, these populations were moved to meet the  
18  
19 310 increasing need for sanitation workers.

21  
22 311 The social position and status of Dalits are associated with their ancestral occupations, which  
23  
24 312 were regarded as impure. Dalits are mostly employed by public and private organisations for  
25  
26  
27 313 sweeping activities, cleaning latrines, removing filth, skinning cattle, sweeping streets and  
28  
29 314 houses. Despite the lack of official data on the economic condition of Dalits, some secondary  
30  
31 315 sources claim that Dalits are engaged in low-paid manual work under severe discriminatory  
32  
33 316 terms<sup>13</sup>, and consequently earn much less than national average, with one source claiming that  
34  
35  
36 317 their income lies between BDT 3000-5000 (considering BDT78=US\$1) while the national  
37  
38 318 average is BDT 7203<sup>13</sup>. Processes of occupational discrimination and unfair payment contribute  
39  
40  
41 319 to excluding the population from secure and safe dwellings. Dalit populations usually reside in  
42  
43 320 unhygienic environments characterised by poor quality, insufficient and irregular water,  
44  
45 321 electricity and gas provision. Overcrowded dwellings, narrow walkways, inadequate basic  
46  
47 322 facilities, such as toilets and water taps, represent significant everyday challenges that become  
48  
49 323 causes of further stigmatisation and marginalisation. Dalit populations often have to rely for  
50  
51 324 access to these services on middlemen and informal brokers, called *mastan* (local thugs); they  
52  
53  
54 325 often rely on violence and illegal deals to negotiate access to resources. The interlacing of social



1  
2  
3 326 structures and political processes shape the Dalits' common everyday experiences of poverty and  
4  
5 327 constitute their shared identity.  
6  
7

8  
9 328 The material circumstances of the Dalit group in Dhaka city were identified as major  
10  
11 329 intermediary determinants of their health status. Data from all this study's sources (e.g. IDIs,  
12  
13 330 FGDs and KIIs) reported poor living conditions, their concentration in government-established  
14  
15 331 slums, or so-called 'colonies', and their highly unsafe housing characterised by poor drainage,  
16  
17 332 sanitation and water supply. Houses in government colonies had brick walls and corrugated iron  
18  
19 333 sheet roofs, while those in private slums were constructed from bamboo, tin, and wood. The  
20  
21 334 sweeper slums were very overcrowded, with most respondents reporting that one small room  
22  
23 335 housed 6–10 family members spanning three generations. The environment was also highly  
24  
25 336 polluted, leading to extremely unsafe living conditions.  
26  
27  
28

29  
30 337 Sweeper slums also reported extremely unhygienic and inadequate sanitation conditions <sup>14</sup>.  
31  
32 338 Bacteria, parasites, and disease vectors breed faster when sanitation and drainage systems are  
33  
34 339 poor and when warmer and wetter conditions are prevalent all year round. Such poor living  
35  
36 340 conditions are likely to increase the incidence of vector-borne/water-borne diseases and  
37  
38 341 infections<sup>13 34</sup>. For example, diarrhoea and respiratory infections, such as pneumonia, were  
39  
40 342 commonly reported as the most frequent diseases among children aged less than five years old <sup>13</sup>.  
41  
42 343 In addition, malaria, dengue fever, and *kala-azar* (visceral leishmaniasis) were reported to be  
43  
44 344 prevalent among all age groups.  
45  
46  
47  
48

49  
50 345 The wider socio-political context influences the effects of these material circumstances and has  
51  
52 346 multiple behavioural implications. The data collected from KIIs, IDIs and FDGs clearly indicates  
53  
54 347 that health policies largely ignore the specific needs of Dalits. For example, policies concerning  
55  
56  
57  
58  
59  
60

1  
2  
3 348 housing, the labour market and land emerged as restricting factors for health. Over centuries,  
4  
5 349 Dalit populations have been allocated space in designated colonies, and Dalit families have  
6  
7  
8 350 shared very small living spaces from generation to generation. Data from all the sources reflected  
9  
10 351 that, despite the potential for promoting basic housing facilities within the government owned  
11  
12 352 land, effective initiatives were never taken due to the lack of policy support. The respondents  
13  
14 353 related that government policy favoured congregating Dalits in such designated colonies, rather  
15  
16 354 than facilitating actions for housing supply and availability, and improving quality. One  
17  
18 355 participant reported:

21  
22 356 *“Government policy has never allowed any action that facilitates housing facilities*  
23  
24 357 *for Dalit. They are living like this in colonies for generation; but, neither own nor*  
25  
26 358 *improve its quality.”* (A key informant in Ganaktuli)

27  
28  
29  
30 359 Although the government has issued policy statements and strategies for the redistribution of  
31  
32 360 non-agriculture and agricultural *khas* land (government-owned fallow land) to landless people  
33  
34 361 since the early 1980s, Dalits have not been considered as a potential beneficiary group. More  
35  
36 362 than half of the participant reported that Dalits lack political power to influence the policy  
37  
38 363 aspects in this regard. One of the participants stated

39  
40  
41 364 *You will see very minimal or no action taken from the govt. to solve the housing problem*  
42  
43 365 *of Dalit. I understand govt. can take necessary initiatives easily but it does not take so.*  
44  
45 366 *Why? I believe, Dalit has no power to influence govt. policy aspects. (A 46-year-old male*  
46  
47 367 *in Ganaktuli)*

48  
49  
50  
51 368 Therefore, the scope for improving health outcomes through facilitating housing conditions for  
52  
53 369 Dalits in allocated *khas* land is constrained by government land policy. One respondent stated:

1  
2  
3 370 *“Landlessness is the first and foremost problem that impacts the overall wellbeing of*  
4  
5 371 *Dalit. Dalit living conditions are beyond description. But it can be improved through*  
6  
7 372 *distributing khas land to Dalit as it is provided to landless people. But, it is a matter*  
8  
9 373 *of fact that Dalit cannot fill in the inclusion criteria set by the policy.”* (A key  
10  
11 informant in Agargaon)  
12 374

13  
14  
15 375 Furthermore, the participants, especially the community leaders and NGO workers, believed that  
16  
17 376 the lack of government interventions restricted the potential for improving living conditions,  
18  
19 377 which also affected the health status of the population.  
20  
21  
22

### 23 378 **Education and Labour**

24  
25  
26 379 An individual’s place in a given society can be described by the concept of ‘social position’, as  
27  
28 380 proposed by Evans et al.<sup>35</sup>, which is generated and maintained under a broader social context.  
29  
30 381 The social position of an individual is dynamically created by a number of elements, such as  
31  
32 382 caste, religion or gender, which transmit intergenerational discriminations and inequalities.  
33  
34 383 Similar to what Evans et al. argue, when interviewing the participants we found that Dalits’  
35  
36 384 health can be seen as an outcome that is generated from social position, whereby an individual  
37  
38 385 and/or group are unable to fully participate in society because of their socio-cultural identity. The  
39  
40 386 socio-economic context has shaped Dalits’ engagement with educational institutions; Dalits face  
41  
42 387 discrimination and are often deprived of education through various means. Our data found that  
43  
44 388 less than 30% of Dalits had received formal schooling, compared to more than 65% of the  
45  
46 389 national population. This figure tends to be even lower outside Dhaka city, as one respondent  
47  
48 390 reported:  
49  
50  
51  
52  
53  
54  
55  
56  
57  
58  
59  
60

1  
2  
3 391 *“In Dhaka city you will find higher number of Dalit who have schooling especially*  
4  
5 392 *among the younger generation. But, the figure will drastically fall if you consider*  
6  
7 393 *among the whole number of Dalit across the country.”* (A Dalit activist and key  
9  
10 394 informant from Ganaktuli)

11  
12  
13 395 Respondents reported that their children faced discrimination by educational institutions, for  
14  
15 396 example being denied admission to private schools, rejection and teasing by teachers or students.  
16  
17 397 The school enrolment of Dalit girls has also decreased due to the practice of child marriage,  
18  
19 398 which subsequently affected sexual and reproductive health. The very low literacy rate among  
20  
21 399 Dalits resulted in little or no access to health information. One of the key informants reported:

22  
23  
24  
25 400 *“Education is vital for improving health and general well-being. When an individual*  
26  
27 401 *lacks education, he/she eventually will be in a worse position to negotiate access to*  
28  
29 402 *services and information such as nutrition. Low literacy amongst the Dalit, in turn,*  
30  
31 403 *affects their health and overall well-being negatively.”* (A key informant in  
32  
33 404 Ganaktuli)

34  
35  
36  
37 405 The participants further reported that the low level of education nurtured significant information  
38  
39 406 asymmetries, which cause health-related misinformation, and limited occupational and income-  
40  
41 407 earning opportunities. Participants reported that, due to their being excluded from mainstream  
42  
43 408 society, Dalits were perceived to have poor levels of infant and child feeding, breastfeeding  
44  
45 409 practices, immunisation take-up, and personal and family hygiene, with an unhealthy  
46  
47 410 consumption of tobacco and alcohol, etc. One participant stated that:

48  
49  
50  
51 411 *“I have little or no educational background. It might diminish my understanding of*  
52  
53 412 *things like whether and what extent things such as smoking bad for health? ...what*

1  
2  
3 413 *and how infant and young child should be fed? ...what are good practices for*  
4  
5 414 *washing hands?” (A 56-year-old woman in Ganaktuli)*  
6  
7

8  
9 415 The data also revealed that little and/or no education narrows the occupational opportunities, and  
10  
11 416 subsequently results in low incomes. In addition to poor educational quality, Dalit occupational  
12  
13 417 opportunities are determined by other factors such as caste-based identities and heredity, and  
14  
15 418 together with poor education this reduces their chance of improving their health status.  
16  
17

18  
19 419 The data analysis also showed how the wider structural determinants interact with and influence  
20  
21 420 the status of Dalits and their material circumstances. We found that the labour market both  
22  
23 421 dynamically excludes and adversely includes Dalits by restricting their social and occupational  
24  
25 422 mobility. The data gathered from community participants and key informants strongly suggests  
26  
27 423 that Dalit ancestral occupations have limited their skill sets and continue to force them to expose  
28  
29 424 themselves to high health risks and to rely on very low wages.  
30  
31  
32

33 425 Exposure to a toxic physical environment whilst at work was commonly reported in the  
34  
35 426 interviews and group discussions. Dalits are traditionally linked to their ancestral occupations,  
36  
37 427 which were passed down from generation to generation. Consequently, the majority of Dalits are  
38  
39 428 engaged in sweeping and cleaning activities, manually handling waste material and garbage  
40  
41 429 whilst using no personal protective equipment. This exposes them to large amounts of dust, bio-  
42  
43 430 aerosols, volatile organic matter, airborne particulates, bacteria, noise, and ergonomic stress.  
44  
45 431 Multiple participants reported that sweepers frequently experience infections. As one participant  
46  
47 432 explained:  
48  
49  
50

51  
52 433 *“Dalit always carry health risk with them at workplaces as they are dealing with*  
53  
54 434 *very serious issues such as dumping garbage or removing dirt. But, they do not use*  
55  
56  
57  
58  
59

1  
2  
3 435 *protective equipment. [...] We are more likely than non-Dalit to experience physical*  
4  
5 436 *injuries or develop infections.” (A 29-year-old cleaner in Agargaon)*  
6  
7

8  
9 437 Similarly, another participant noted:

10  
11 438 *“Dalit sweepers don’t take any dust protective measure; therefore, they inhale it... I*  
12  
13 439 *witnessed my colleagues develop respiratory infections and other airborne*  
14  
15 440 *diseases.” (A street sweeper in Ganaktuli)*  
16  
17

18  
19 441 Nonetheless, Dalit participants were not inclined to look for alternative occupations, as they said  
20  
21 442 there was no scope for them to work outside of these historical, marginalised social spaces.  
22  
23 443 Participants were highly aware of their role in the history of the country, and explained that they  
24  
25 444 would face significant resistance if they tried to access occupations that did not conform to their  
26  
27 445 low social and political status. Occupation-based discrimination, lingering poverty, and social  
28  
29 446 stigmatisation reduced their opportunities to participate in the labour market on equal terms (in  
30  
31 447 relation to non-Dalits) and to engage with activities that were not considered ‘impure’. One FGD  
32  
33 448 participant talked about how the lack of skills combined with long-established social norms  
34  
35 449 strongly discourage Dalits from engaging differently with the labour market:  
36  
37

38  
39  
40 450 *“We are traditionally engaged in sweeping, as my ancestors did. I have no other skill*  
41  
42 451 *except this. How can I do [anything else], for example, pulling a rickshaw or running*  
43  
44 452 *a business? Similarly, people will not come and take a cup of tea if I operate a tea*  
45  
46 453 *stall.” (A 37 year old cleaner in Agargaon)*  
47  
48  
49

50 454 This particular barrier is becoming increasingly problematic, as over 70% of the respondents  
51  
52 455 reported that their access to sweeping jobs had become highly insecure and precarious; although  
53  
54 456 initially the nature of their recruitment in sweeping activities was permanent, Dalits had more  
55  
56  
57  
58

1  
2  
3 457 recently had to compete for their occupation with non-traditional Muslim sweepers. Although the  
4  
5 458 city corporation's sweeper recruitment policy states that the Dalit are given a quota, the  
6  
7 459 authorities have not adhered to this system in recent years. The frequent recruitment of non-  
8  
9  
10 460 traditional sweepers by different government and non-government organisations has  
11  
12 461 considerably narrowed Dalits' employment options, leading to financial hardship:

13  
14  
15 462 *“Some proportion of sweeping is reserved in government offices. However, non-Dalit*  
16  
17 463 *sweepers are getting these jobs through bribes to political leaders and government*  
18  
19 464 *officials. Where will we go for work? We will likely have to resort to unsocial and*  
20  
21 465 *illegal activities to survive if this situation is not improved.”* (A housewife in  
22  
23 466 Agargaon)

24  
25  
26  
27 467 The lack of a sufficient and regular income limited Dalit participants' capacity to afford basic  
28  
29 468 necessities, including food, healthcare (particularly from private facilities), and education fees.  
30  
31 469 Their average monthly household income ranged from BDT 5850 to 8970 (considering  
32  
33 470 BDT78=US\$1), which was insufficient to buy three nutritious meals per day for an extended  
34  
35 471 family.

## 40 472 **Politics and Relationships**

41  
42  
43 473 Our data has identified a set of social and political factors in the given political and governance  
44  
45 474 system that impact upon the Dalit health status through stratifying individual positions on the  
46  
47 475 basis of hierarchies of power and prestige, and access to resources. Due to their weak socio-  
48  
49 476 economic position, caste-based identity and discrimination, Dalits in the studied areas generally  
50  
51 477 have a weak power of participation in political processes, both at the national and community  
52  
53 478 level. One of the participants from Ganaktuli reported:

1  
2  
3 479 *“Our sweeping identity shapes our world – our work, our rights, our opportunities,*  
4  
5 480 *our limitations, it shapes everything. Hundreds of years we are living a confined life*  
6  
7 481 *in a sense that the mainstream society maintains a greater distance as we belong to*  
8  
9 482 *such a low caste. Where are we? ...In education, in health, in politics? ...nowhere.”*

10  
11  
12 483 (add details)

13  
14  
15 484 The lack of political participation generated by a lack of consideration and discrimination by  
16  
17 485 other powerful groups limited Dalits’ opportunity to voice their needs and impeded their capacity  
18  
19 486 to exercise other constitutional and human rights. Making a direct connection between political  
20  
21 487 engagement and health, one participant voiced:

22  
23  
24  
25 488 *“To my knowledge, no one from the Dalit community has appeared as a candidate in*  
26  
27 489 *any election at national or community level. Even, they are likely to be less*  
28  
29 490 *concerned about this. Such an absence in political process diminishes our capacity*  
30  
31 491 *to protect communal interest concerning health.”* (A 34-year-old Dalit in Agargaon)

32  
33  
34  
35 492 Data from interviews with key informants and group discussants indicated that factors relating to  
36  
37 493 macroeconomic policies influenced the health of Dalits. Macro level policies were considered to  
38  
39 494 be having a negative impact on their health status and health seeking capacity, and public  
40  
41 495 allocations for social protection and healthcare schemes continued to exclude people living in  
42  
43 496 urban settings. One of the key informants reflected on the situation:

44  
45  
46  
47 497 *“Government policy only provides safety-net support for poor in the rural setting.*  
48  
49 498 *However, the Dalit are concentrated on the big cities and smaller towns. ...therefore*  
50  
51 499 *we are not eligible for that.”* (A key informant in Agargaon)



1  
2  
3 500 This policy significantly affected Dalits' capacity to seek and afford treatment in settings where  
4  
5 501 they were exposed to regular health shocks and hazards. For example, in the existing health  
6  
7 502 policy, two-thirds of healthcare costs are financed via an out-of-pocket mechanism <sup>36</sup>, and the  
8  
9  
10 503 urban poor experience limited or no healthcare support. Participants reported that having no  
11  
12 504 social protection schemes meant that they had to rely on considerable out-of-pocket healthcare  
13  
14 505 expenditure in order to access healthcare from both public and private facilities. The low  
15  
16 506 income-earning capacity of Dalits interacted directly with their individual socio-economic  
17  
18 507 condition, particularly for those suffering from chronic health conditions that required prolonged  
19  
20 508 and continuous care and medication. The inability to afford treatment was frequently reported as  
21  
22 509 an important barrier to better health by respondents suffering from cardiac issues, diabetes and  
23  
24 510 renal disease due to out-of-pocket costs. One of them said:

25  
26  
27  
28  
29 511 *"I have been suffering from diabetes for the past years. The doctor prescribed*  
30  
31 512 *several drugs that I imperatively need to continue taking to control my sugar levels. I*  
32  
33 513 *cannot afford such drug for rest of my life [...] you will never expect to get diabetic*  
34  
35 514 *drug free of cost."* (A street sweeper in Ganaktuli)

36  
37  
38  
39 515 Some participants highlighted the heavy reliance on expensive private health service providers as  
40  
41 516 a significant determinant of bad health. They indicated that an individual's health status tended  
42  
43 517 to deteriorate when they needed to access healthcare services from a local private institution. A  
44  
45 518 key informant in Ganaktuli explained that local private healthcare facilities generally tended to  
46  
47 519 be better equipped than local government facilities, and increasingly played a 'vital role in  
48  
49 520 healthcare services delivery.' However, he noted:

50  
51  
52  
53 521 *"If the problem is not minimal and, you must seek consultant at private facilities this*  
54  
55 522 *involves huge expenses that are most likely beyond the capacity of Dalit. ...I know a*

1  
2  
3 523 *few individual who have been suffering from chronic disease but fail to take care*  
4  
5 524 *from private clinic due to the cost incurred.” (A key informant in Ganaktuli)*  
6  
7

8 525 Beyond the costs incurred by care, participants also identified the behaviour of healthcare  
9  
10 526 professionals in public and private facilities as barriers to their accessing better health.  
11  
12 527 Respondents shared experiences of entrenched stigmatisation and discrimination that hampered  
13  
14 528 their willingness and motivation to see a doctor, thereby generating a process of self-exclusion  
15  
16 529 from these facilities.  
17  
18

19  
20  
21 530 The Dalit identity generates considerable caste-based discrimination, enhancing exclusion,  
22  
23 531 broadening inequalities, and restricting them from accessing healthcare. Dalit people, considered  
24  
25 532 untouchable due to their traditional employment that brings them into contact with human  
26  
27 533 excreta, dirt, garbage, bad odours, dead bodies, and other elements, are defined by others by their  
28  
29 534 impurity. One participant described how mainstream society perceives the Dalit, and the  
30  
31 535 following quote denotes how societal perceptions have been internalised by Dalits themselves:  
32  
33

34  
35 536 *“We are methar [a Bangla colloquial term signifying degradation, disgust], nothing*  
36  
37 537 *more than that. Our position can be nowhere else but at the bottom of the society.”*  
38  
39 538 (A 34-year-old scavenger in Agargaon)  
40  
41  
42

43 539 These socio-economic mechanisms and Dalits' identity interact with other factors to create  
44  
45 540 psychosocial factors that determine their health status. Due to social discrimination and  
46  
47 541 exclusion, Dalit often lose their self-worth and experience depression and shame. Such feelings  
48  
49 542 in turn lead to social isolation and further narrow individual and/or community participation in  
50  
51 543 health programmes. The participants further stated that Dalits could not fully participate in  
52  
53 544 community-based health programmes focusing on child and maternal health, the promotion of  
54  
55  
56  
57  
58  
59  
60

1  
2  
3 545 nutrition, immunisation, sanitation and hygiene. One participant explained the situation as  
4  
5 546 follows:

6  
7  
8 547 *“Dalit are social excluded and discriminated in many ways. Due to such*  
9  
10 548 *discrimination and exclusion, they might lose self-esteem to be open-minded in*  
11  
12 549 *participation of community-led health programmes.”* (A 34-year-old cleaner in  
13  
14  
15 550 Agargaon)

16  
17  
18 551 Prejudices against the Dalits are also reproduced by healthcare workers. Most respondents  
19  
20 552 reported that healthcare workers were more likely to consider their health problems to be less  
21  
22 553 serious than those of non-Dalits in order to limit the amount of time spent with them and their  
23  
24 554 exposure to ‘impurity’. In small townships and localities outside Dhaka city, for example in  
25  
26 555 primary level healthcare facilities where Dalits are easily identified by locals, they reported being  
27  
28 556 more likely to face such prejudice and discrimination from healthcare workers. Multiple  
29  
30 557 participants echoed the following experience of visiting a health facility:

31  
32  
33  
34  
35 558 *“Sometimes we do not disclose our identity to avoid neglect and unpleasant*  
36  
37 559 *situations. ... I can tell you a tragic story about the hospital admission of a Dalit*  
38  
39 560 *woman. She was denied to get hospital admission and was kept lying on the floor of*  
40  
41 561 *the balcony because she was a Dalit. Meanwhile, she developed additional problems*  
42  
43 562 *— common cold, fever and breathing difficulties in such cold weather. Only later,*  
44  
45 563 *when we put the issue forward the hospital authority admitted her and provided a*  
46  
47 564 *bed.”* (A 51-year-old Dalit rights activist in Ganaktuli)  
48  
49  
50  
51  
52  
53  
54  
55  
56  
57  
58  
59  
60

1  
2  
3 565 Several participants described a lack of attention from healthcare workers, and difficulties in  
4  
5 566 obtaining adequate information regarding their health problems and required treatments. The  
6  
7  
8 567 following excerpt reflects this situation:  
9

10 568 *“Doctors/nurses are unwilling to discuss details regarding any health information or*  
11  
12 569 *health intervention in the facilities. They just provide minimal medicine and maintain*  
13  
14  
15 570 *indifference when asked about a health-related problem.”* (A 55-year-old leather  
16  
17 571 worker in Ganaktuli)  
18  
19

20  
21 572 Such negligent and discriminatory behaviour on the part of healthcare providers made Dalits  
22  
23 573 hesitant to participate in health promotion activities to enhance their own health, and even  
24  
25 574 influenced their decisions to delay seeking treatment for infectious diseases. One of the key  
26  
27 575 informants explained how the socio-political position of the Dalit community impacted upon the  
28  
29  
30 576 care-seeking behaviour of Dalits:  
31

32 577 *“The Dalit live as a minority within the mainstream. All aspects of their lives – such*  
33  
34 578 *as profession, access to services, rights and obligations, decisions, and so on – are*  
35  
36  
37 579 *determined and ascribed by these social and political contexts.”* (A NGO worker in  
38  
39 580 Ganaktuli)  
40  
41

42  
43 581 Denied access to formal and informal safety nets, this marginalisation is reinforced by  
44  
45 582 idiosyncratic forms of discrimination based on class, gender, physical ability and age in  
46  
47 583 particular. Under-nutrition of low-income (often extreme poor) adolescent girls, pregnant  
48  
49 584 mothers and elderly widows was found to be particularly severe. Health inequalities experienced  
50  
51  
52 585 by Dalits were also influenced by the manner in which policies are developed and translated into  
53  
54 586 practice. One key informant stated:  
55  
56  
57  
58  
59  
60

1  
2  
3 587 *“The state did not consider that context-specific healthcare provision might be*  
4  
5 588 *effective for providing services to this kind of disadvantaged group of people. We*  
6  
7 589 *need the formulation of policies that cover the delivery of health services to the Dalit*  
8  
9 590 *and other groups of people who are in an unfavourable position to seek care.”* (A  
10  
11  
12 591 Dalit rights activist in Agargaon)

13  
14  
15 592 In addition, some respondents reported that being a Dalit was associated with behaviours that  
16  
17 593 negatively affected their health. Many respondents claimed that male Dalits were likely to  
18  
19 594 consume high quantities of low-quality alcohol and tobacco, noting that this behaviour can be  
20  
21 595 explained by the difficult occupations and psycho-social pressure they experienced. Exposure to  
22  
23 596 bad odours, dirt and dead organisms can induce vomiting and appetite loss, and according to  
24  
25 597 some respondents consuming alcohol and cigarettes mitigated the negative psychological and  
26  
27 598 physical effects of this type of work. Historically, Dalits have been characterised by such  
28  
29 599 depictions and so this is not new; it is beyond the scope of this research to assess the veracity of  
30  
31 600 such claims. However, what is noteworthy is how such claims serve to further stigmatise  
32  
33 601 members of this population group, who according to some respondents, are *“habituated to*  
34  
35 602 *consume alcohol and tobacco products”* as they believe it is *“a habit rooted in their*  
36  
37 603 *occupational roles and psychosocial identity”* (A 23-year-old scavenger in Agargaon). Our data  
38  
39 604 suggests that Dalit children living in marginalised settlements suffer from stigmatisation and are  
40  
41 605 therefore constrained in their physical mobility and social interactions. Although it was not  
42  
43 606 possible to measure the physical growth of children due to the nature of this study, participants  
44  
45 607 reported that children, particularly those aged under 5 years, were likely to be undernourished.  
46  
47 608 Poverty, low health information and awareness, and physical environment were reported as the  
48  
49 609 most likely causal factors for such poor physical and social development of young children.  
50  
51  
52  
53  
54  
55  
56  
57  
58  
59  
60

1  
2  
3 610 As a response to the hostile wider socio-political context and challenging material circumstances,  
4  
5 611 traditional health practices and rituals are widely practised within the Dalit community.  
6  
7 612 Religious beliefs and spirituality influence their health status and attitudes towards seeking  
8  
9 613 treatment. It was for example found that low-income Dalits adhering to strict religious beliefs  
10  
11 614 were more likely to rely on faith-based healing for sexual and reproductive health, pregnancy  
12  
13 615 care, and infant and child feeding practices.  
14  
15  
16  
17

## 18 616 **DISCUSSION**

19  
20  
21 617 To the best of our knowledge this is the first study aimed at understanding the socio-cultural and  
22  
23 618 economic determinants of health inequalities in the Dalit population in Bangladesh, and it applies  
24  
25 619 the CSDH Conceptual Framework developed by the WHO. Our analysis suggested that the  
26  
27 620 mechanisms of social and economic discrimination that result in severe health inequalities (as  
28  
29 621 claimed by the participants) for Dalits are supported and reinforced by an array of interconnected  
30  
31 622 structural factors, including geographic marginalisation, poor living conditions, low formal  
32  
33 623 education, little political representation, poor access to resources, limited labour market  
34  
35 624 engagement, and stigmatisation. Stigmatisation was found to be pervasive, and to directly shape  
36  
37 625 relational and structural determinants of health.  
38  
39  
40  
41  
42

43 626 Dalits' occupation-based identity determines their ability to interact with non-Dalits and with the  
44  
45 627 state, and their stigmatisation as an impure, unhygienic, uneducated population group reinforces  
46  
47 628 these processes and worsens their material and psychosocial circumstances. These are identified  
48  
49 629 as significant intermediary determinants of their health status within this specific urban context  
50  
51 630<sup>37</sup>. Our findings confirm that health inequalities are rooted in the social process, whereby  
52  
53 631 structural, contextual, and interpersonal factors intersect and influence each other<sup>38-40</sup> and build  
54  
55  
56  
57  
58  
59  
60

1  
2  
3 632 on these to show how pervasive identity-based discrimination perpetuates the causes and effects  
4  
5 633 of health inequalities.

6  
7  
8 634 Untouchability and caste-based discrimination perpetuate an exclusionary process that results in  
9  
10 635 this population belonging to a lower caste status with limited or no access to or participation in  
11  
12 636 healthcare services or health seeking behaviours, and has been similarly noted by studies  
13  
14 637 conducted in Indian societies<sup>41-45</sup>. Broadly, these socio-culturally constructed exclusionary  
15  
16 638 processes restrict Dalits' economic, political, social and cultural participation, which in turn  
17  
18 639 negatively impacts upon their health and well-being at the individual, communal, regional, and  
19  
20 640 global levels. These observations are also in line with a prior report of the Social Exclusion  
21  
22 641 Knowledge Network (SEKN) to the World Health Commission on Social Determinants of  
23  
24 642 Health, which stated that sociocultural exclusion is a dynamic and multi-dimensional process  
25  
26 643 driven by unequal power relations<sup>39;42;46</sup>.

27  
28  
29 644 Our results also highlight power differentials between Dalit individuals and healthcare  
30  
31 645 professionals, which enhance health inequities and further victimise Dalits, and are in line with  
32  
33 646 the results of another study in India<sup>47</sup>. These power differentials further repress the social,  
34  
35 647 political, and economic participation of Dalits, leading to the unequal and unjust distribution of  
36  
37 648 resources and access to services. Overall, sociocultural exclusionary processes generate,  
38  
39 649 preserve, and reproduce inequalities regarding participating in, accessing, and utilising health  
40  
41 650 services, which perpetuate intergenerational deprivation and discrimination. Other studies have  
42  
43 651 demonstrated that caste-based exclusion, deprivation, and discrimination have been practised on  
44  
45 652 the Indian subcontinent for thousands of years<sup>5;47</sup>.

1  
2  
3 653 The socio-economic and political context, together with macro-policies, facilitate the  
4  
5 654 exclusionary process whereby Dalit people have limited opportunities for livelihood  
6  
7 655 development and to improve their economic condition, consequently reducing their income  
8  
9 656 opportunities and trapping them in poverty. This trap is sustained and enhanced through  
10  
11 657 intergenerational transmission. Income is strongly associated with health and influences a range  
12  
13 658 of material circumstances that directly impact health. Economic exclusion also determines access  
14  
15 659 to and utilisation of health services, while economic marginalisation appears to limit the  
16  
17 660 provision of healthcare, health-seeking behaviours, and access to other basic services provided  
18  
19 661 by members of society and the state <sup>35;48</sup>. In addition, social and public policies narrow  
20  
21 662 healthcare utilisation and healthcare-seeking, e.g. catastrophic out-of-pocket costs and the  
22  
23 663 shrunken delivery of healthcare by public health facilities. The literature shows that over the  
24  
25 664 recent years out-of-pocket costs are gradually increasing due to the steady expansion of private  
26  
27 665 healthcare services <sup>36;49</sup> and this affects healthcare seeking and utilisation. The wider structural  
28  
29 666 factors facilitate the Dalits' compromised material circumstances, unhealthy lifestyle, and social  
30  
31 667 isolation. As noted by other studies <sup>34;50;51</sup>, our findings show that poor living and working  
32  
33 668 conditions, limited healthcare access and support, poor state of water and sanitation, habit of  
34  
35 669 tobacco consumption, stress, and isolation from health services, negatively impact upon health  
36  
37 670 status and healthcare seeking. A lower social background was observed by Dubey <sup>52</sup> to  
38  
39 671 contribute to weakening social networks that perpetuate poor healthcare access and healthcare  
40  
41 672 seeking. Furthermore, the health system itself influences the health of Dalits as it presents Dalits  
42  
43 673 with greater financial costs when accessing or seeking healthcare, as noted in other studies <sup>36;53</sup>.  
44  
45 674 Moreover, access to and acceptance by healthcare providers is determined by the social position  
46  
47 675 of individuals and groups; Dalits' low social position restricts their access to healthcare  
48  
49  
50  
51  
52  
53  
54  
55  
56  
57  
58  
59



1  
2  
3 676 professionals, as had been previously reported in many regions across the world <sup>50;54;55</sup>. Our  
4  
5 677 findings suggest that the health status of the Dalit community is not shaped solely by clinical  
6  
7 678 issues but also by a range of sociocultural determinants, as proposed in several other studies <sup>14;56</sup>.  
8  
9  
10 679 For disadvantaged, marginalised, and socio-culturally excluded individuals or groups like Dalits,  
11  
12 680 health outcome improvement is closely linked to public policies and actions that address socio-  
13  
14 681 cultural determinants of health inequities, with the government playing a central role <sup>57</sup>.

## 18 682 **LIMITATIONS OF THE STUDY**

21 683 We think the limitations of this study warrant comments. Firstly, due to unavailability (we  
22  
23 684 approached some other groups to participate in the interviews but they could not participate  
24  
25 685 because either they had other commitments in the study time or did not show interest to  
26  
27 686 participate), and resource and time limitation, this study did not include the entire groups and/or  
28  
29 687 stakeholders, such as state officials, employers of Dalit population, government healthcare  
30  
31 688 providers, which might have provided alternative source of information to adhere greater level of  
32  
33 689 trustworthiness. However, we maintained a greater level of trustworthiness by applying four  
34  
35 690 principles—credibility, transferability, conformability, and dependability. Furthermore, inter-  
36  
37 691 coder or synchronic reliability referring the amount of agreement between independent coders of  
38  
39 692 the data, and triangulation between methods, and participants were used to avoid biases in this  
40  
41 693 study. Secondly, some participants might have been dominating in the group discussions which  
42  
43 694 caused other participants to feel comfortable sharing their own opinions and experiences  
44  
45 695 honestly. However, this limitation was mitigated by the experienced facilitators who built good  
46  
47 696 rapports and enable each person's voice to be heard by elaborating, clarifying, agreeing or  
48  
49 697 disagreeing, querying, explaining of the topic of discussion. Thirdly, the qualitative strand of this  
50  
51 698 study was geographically limited to an urban setting (Dhaka city); therefore, the results may not  
52  
53  
54  
55  
56  
57  
58  
59  
60

1  
2  
3 699 easily be transferable across populations and places; for example, a small Bangladeshi town.  
4  
5 700 Nonetheless, considering the data collected, we believe that this study provides an in-depth  
6  
7 701 understanding of a set of social, cultural, economic and political factors that strongly determine  
8  
9 702 the health outcomes of Dalits population.  
10  
11  
12

## 13 703 **CONCLUSIONS AND IMPLICATION FOR THE STUDY**

14  
15  
16  
17 704 Although this subject has previously been sporadically discussed in newspaper reports, NGO  
18  
19 705 reports and media reports, this paper is one of the first qualitative studies to explore a vast array  
20  
21 706 of factors that determine health inequalities in urban Dalit populations in Bangladesh. This study  
22  
23 707 is expected to contribute to knowledge by investigating how these elements interact and play a  
24  
25 708 determining role in shaping Dalits' health status. This study supports the view that Dalit health  
26  
27 709 inequalities are largely affected by a wide range of socio-cultural factors which can be observed  
28  
29 710 in societies across many regions of South Asia.  
30  
31  
32

33  
34 711 Importantly, we argue for the need to recognise the significant intermediary effects of everyday  
35  
36 712 discrimination and stigmatisation, perpetuated by socio-economic structures, on educational  
37  
38 713 achievement, political participation, occupations and health behaviours. Dalits' social and  
39  
40 714 political history shapes their social position in society today by limiting their power relative to  
41  
42 715 non-Dalits in key social structures, including the labour market and health institutions. These  
43  
44 716 mechanisms enhance exclusionary processes through mutually reinforcing sets of socio-cultural  
45  
46 717 and economic dynamics, and these generate, sustain, deepen, reinforce and reproduce  
47  
48 718 inequalities in the health of Dalit populations. Therefore, it is unlikely that the health status of  
49  
50 719 Dalit populations will be improved through the better clinical performance of existing healthcare  
51  
52 720 providers alone. Recognition of the hostility of existing institutions and addressing entrenched  
53  
54  
55  
56  
57  
58  
59

1  
2  
3 721 exclusionary processes (including self-exclusion) and adverse inclusion is needed, together with  
4  
5 722 research on the potential benefits of developing state-initiated social protection schemes focusing  
6  
7  
8 723 on deepening the social inclusion agenda.  
9  
10

11 724  
12  
13

14  
15 725  
16  
17

18 726  
19  
20

21  
22 727  
23  
24

25  
26 728  
27  
28

29 **Abbreviations**  
30

31  
32  
33 730 BDT: Bangladesh Taka; CSDH: Commission on Social Determinants of Health; FGD: Focus  
34  
35 731 Group Discussions; IDI: In-depth Interviews; KII: Key Informant Interviews; NGO: Non-  
36  
37 732 governmental Organisations; PWD: Public Works Department; SEKN: Social Exclusion  
38  
39 733 Knowledge Network; WHO: World Health Organization; USD: United State Dollar;  
40  
41  
42  
43  
44  
45  
46  
47  
48  
49  
50  
51  
52  
53  
54  
55  
56  
57  
58  
59  
60

## 734 **Acknowledgements**

735 The authors would like to extend their gratitude to the Department of Anthropology, Dhaka  
736 University for their approval of this study. The authors are also grateful to the members of the  
737 two Dalit communities, and NGO workers who participated in the interviews and group  
738 discussions.

## 739 **Funding**

740 This study received no funding from any sources.

## 741 **Availability of data and materials**

742 As we informed the participants during the consent process that data would only be shared  
743 within the research team, then the data cannot be made available publicly. However, we shared  
744 the interview and discussion guidelines under ‘additional supporting files.’ Interested parties may  
745 contact Mr. Md. Shahin Chowdhury ([anthro.du@yahoo.com](mailto:anthro.du@yahoo.com)), Senior Administrative Assistant,  
746 Department of Anthropology, Dhaka University, for further inquiries in this regard.

## 747 **Author contributions**

748 AK ([ashraful.icddrb@gmail.com](mailto:ashraful.icddrb@gmail.com)) conceptualized the study, participated in data collection and  
749 analysis, and prepared the first draft of the manuscript. MRLM ([mathilde.maitrot@york.ac.uk](mailto:mathilde.maitrot@york.ac.uk))  
750 reviewed and edited the manuscript. AA ([israabd@gmail.com](mailto:israabd@gmail.com)) guided the data collection and  
751 analysis. All authors read and approved the final version of the manuscript.

## 752 **Competing Interest**

1  
2  
3  
4  
5  
6  
7  
8  
9  
10  
11  
12  
13  
14  
15  
16  
17  
18  
19  
20  
21  
22  
23  
24  
25  
26  
27  
28  
29  
30  
31  
32  
33  
34  
35  
36  
37  
38  
39  
40  
41  
42  
43  
44  
45  
46  
47  
48  
49  
50  
51  
52  
53  
54  
55  
56  
57  
58  
59  
60

753 The authors declare that they have no conflicts of interest.

754 **Consent for publication**

755 Participants provided consent to publish their quotes anonymously or using pseudonyms.

756

For peer review only

## 757 Reference List

758

759 (1) El AS, Christou A, Reichenbach L, Osman FA, Azad K, Islam KS et al. Community-based  
760 approaches and partnerships: innovations in health-service delivery in Bangladesh. *Lancet* 2013;  
761 382(9909):2012-2026.

762 (2) Chowdhury AM, Bhuiya A, Chowdhury ME, Rasheed S, Hussain Z, Chen LC. The Bangladesh  
763 paradox: exceptional health achievement despite economic poverty. *Lancet* 2013;  
764 382(9906):1734-1745.

765 (3) MOHFP GoB. Health population and nutrition sector strategic plan (HPNSSP) : 2011-2016. 3rd  
766 ed. Dhaka: Planning Wing, Ministry of Health and Family Welfare, Government of the People's  
767 Republic of Bangladesh; 2010.

768 (4) Clifford B. Dalit Rights Are Human Rights: Caste Discrimination, International Activism, and  
769 the Construction of a New Human Rights Issue. *Human Rights Quarterly* 2007; 29(1):167-193.

770 (5) Asaduzzaman A. The "Pariah" people: an ethnography of the urban sweepers in Bangladesh. The  
771 University Press; 2001.

772 (6) Sultana H, Subedi DB. caste system and resistance: the case of untouchable hindu sweepers in  
773 Bangladesh. *Int J Polit Cult Soc* 2015;1-14.

774 (7) International Dalit Solidarity Network (IDSN). Working globally against discrimination based on  
775 work and descent. Copenhagen: IDSN; 2013. 1-51.

776 (8) Islam F. political participation of Dalit women in Dhaka city, Bangladesh. Dhaka: 2007.

777 (9) National Institute of Population Research and Training (NIPORT), Mitra and Associates.  
778 Bangladesh Demographic and Health Survey 2014: Full Report. 1-354. 2016. Dhaka, Bangladesh  
779 and Rockville, Maryland, USA. 10-12-2016.

780 Ref Type: Report

781 (10) National Institute of Population Research and Training (NIPORT). Bangladesh Urban Health  
782 Survey 2013: Final Report. 2014. Dhaka, Bangladesh and Rockville, Maryland, USA. 10-15-2014.

783 Ref Type: Report

784 (11) Govindaraj R, Raju D, Secci F, Chowdhury S, Frere JJ. Health and Nutrition in Urban Bangladesh:  
785 Social Determinants and Health Sector Governance. The World Bank; 2018.

786 (12) Roy RK. Assessment of Nutritional Status and Its Determinants Among Pre-School Children  
787 Within Dalit Communities of Jessore City in Bangladesh: A Cross-Sectional Study. *Age* 2018;  
788 24(35):43.

789 (13) Chowdhury IU. Caste-based Discrimination in South Asia: A Study of Bangladesh. New Delhi:  
790 Indian Institute of Dalit Studies; 2009.

- 1  
2  
3 791 (14) Islam M, Parvez A. Dalit Initiatives in Bangladesh. Dhaka: Nagorik Uddyog & Bangladesh Dalit  
4 792 and Excluded Rights Movement; 2013.  
5  
6 793 (15) Social, economic and cultural status of dalit community in Bangladesh. 2018.  
7 794 Ref Type: Report  
8  
9  
10 795 (16) National Institute of Population Research and Training (NIPORT), Mitra and Associates, ICF  
11 796 International. Bangladesh Demographic and Health Survey:2014. 1-66. 2014. Dhaka,  
12 797 Bangladesh.  
13 798 Ref Type: Report  
14  
15 799 (17) The Life and Days of (Dalit) Sweepers in Bangladesh. The Daily Star 2006.  
16  
17 800 (18) Lundberg O. Causal explanation for class inequality in health - An empirical analysis. *Social Science*  
18 801 *& Medicine* 1991; 32(4):385-393.  
19  
20 802 (19) Davidson R, Mitchell R, Hunt K. Location, location, location: the role of experience of  
21 803 disadvantage in lay perceptions of area inequalities in health. *Health Place* 2008; 14(2):167-181.  
22  
23  
24 804 (20) Gwatkin DR, Bhuiya A, Victora CG. Making health systems more equitable. *Lancet* 2004;  
25 805 364(9441):1273-1280.  
26  
27 806 (21) Graham H. Social determinants and their unequal distribution:Clarifying policy understanding.  
28 807 *The Maibank Quarterly* 2004; 82(1):101-124.  
29  
30 808 (22) Davidson R, Kitzinger J, Hunt K. The wealthy get healthy, the poor get poorly? Lay perceptions of  
31 809 health inequalities. *Soc Sci Med* 2006; 62(9):2171-2182.  
32  
33 810 (23) Ahmed SM, Adams AM, Chowdhury M, Bhuiya A. Gender, socioeconomic development and  
34 811 health-seeking behaviour in Bangladesh. *Soc Sci Med* 2000; 51(3):361-371.  
35  
36  
37 812 (24) Solar O, Irwin A. A conceptual framework for action on the social determinants of health: Social  
38 813 Determinants of Health Discussion Paper 2 (Policy and Practice). Geneva Switzerland World  
39 814 Health Organization [WHO] 2010.; 2007.  
40  
41 815 (25) Krieger N. Theories for social epidemiology in the 21st century: an ecosocial perspective. *Int J*  
42 816 *Epidemiol* 2001; 30(4):668-677.  
43  
44 817 (26) Marmot M, Wilkinson RG. Psychosocial and material pathways in the relation between income  
45 818 and health: a response to Lynch et al. *BMJ* 2001; 322(7296):1233-1236.  
46  
47 819 (27) Smith GD, Egger M. Commentary: understanding it all--health, meta-theories, and mortality  
48 820 trends. *BMJ* 1996; 313(7072):1584-1585.  
49  
50  
51 821 (28) Wilkinson RG, Pickett KE. Income inequality and population health: a review and explanation of  
52 822 the evidence. *Soc Sci Med* 2006; 62(7):1768-1784.  
53  
54 823 (29) Anderson C. Presenting and evaluating qualitative research. *Am J Pharm Educ* 2010; 74(8):141.  
55  
56  
57  
58  
59  
60

- 1  
2  
3 824 (30) Patton MQ. Qualitative Research and Evaluation Methods , 209-339. Thousand Oaks, CA: Sage.  
4 825 Un estudio cualitativo; 2002.  
5  
6 826 (31) Guest G, Bunce A, Johnson L. How many interviews are enough? An experiment with data  
7 827 saturation and variability. *Field Methods* 2006; 18(1):59-82.  
8  
9 828 (32) Abbas T, Charles T. Handbook of mixed methods in social & behavioral research. Sage  
10 829 Publications, Thousand Oaks; 2003.  
11  
12 830 (33) Miles MB, Huberman AM. Qualitative data analysis: A sourcebook. *Beverly Hills: Sage*  
13 831 *Publications* 1994.  
14  
15 832 (34) Kumar Saha C. Dynamics of Risk Determinants Regarding Diarrhea Affected Slum Children in  
16 833 Urban Dhaka: A Dysfunctional Health Care System. *Current Research Journal of Social Sciences*  
17 834 2012; 4:304-313.  
18  
19 835 (35) Evans T, Whitehead M, Diderichsen F, Bhuiya A, Wirth M. Challenging Inequities in Health : From  
20 836 Ethics to Action. *Oxford UP* 2001.  
21  
22 837 (36) Islam A, Biswas T. Health system in Bangladesh: Challenges and opportunities. *American Journal*  
23 838 *of Health Research* 2014; 2(6):366-374.  
24  
25 839 (37) Hankivsky O. Intersectionality 101. The Institute for Intersectionality Research & Policy, SFU;  
26 840 2014.  
27  
28 841 (38) Cairney J, Veldhuizen S, Vigod S, Streiner DL, Wade TJ, Kurdyak P. Exploring the social  
29 842 determinants of mental health service use using intersectionality theory and CART analysis. *J*  
30 843 *Epidemiol Community Health* 2014; 68(2):145-150.  
31  
32 844 (39) Patil RR. Caste-, work-, and descent-based discrimination as a determinant of health in social  
33 845 epidemiology. *Soc Work Public Health* 2014; 29(4):342-349.  
34  
35 846 (40) Seng JS, Lopez WD, Sperlich M, Hamama L, Reed Meldrum CD. Marginalized identities,  
36 847 discrimination burden, and mental health: empirical exploration of an interpersonal-level  
37 848 approach to modeling intersectionality. *Soc Sci Med* 2012; 75(12):2437-2445.  
38  
39 849 (41) Mohindra KS, Haddad S, Narayana D. Women's health in a rural community in Kerala, India: do  
40 850 caste and socioeconomic position matter? *J Epidemiol Community Health* 2006; 60(12):1020-  
41 851 1026.  
42  
43 852 (42) Nayar KR. Social exclusion, caste & health: a review based on the social determinants  
44 853 framework. *Indian J Med Res* 2007; 126(4):355-363.  
45  
46 854 (43) Agarwal S, Srivastava A. Social determinants of children's health in urban areas in India. *J Health*  
47 855 *Care Poor Underserved* 2009; 20(4 Suppl):68-89.  
48  
49 856 (44) Vart P, Jaglan A, Shafique K. Caste-based social inequalities and childhood anemia in India:  
50 857 results from the National Family Health Survey (NFHS) 2005-2006. *BMC Public Health* 2015;  
51 858 15:537.  
52  
53  
54  
55  
56  
57  
58  
59  
60



- 1  
2  
3 859 (45) Baral SC, Karki DK, Newell JN. Causes of stigma and discrimination associated with tuberculosis  
4 860 in Nepal: a qualitative study. *BMC Public Health* 2007; 7:211.  
5  
6 861 (46) Kurian NJ. Widening economic & social disparities: implications for India. *Indian J Med Res* 2007;  
7 862 126(4):374-380.  
8  
9 863 (47) Sabharwal SN, Sharma S, Diwakar G D, Naik AK. Caste discrimination as a factor in poor access to  
10 864 public health service system: a case study of janani suraksha yojana scheme. *Journal of Social*  
11 865 *Inclusion Studies* 2014; 1(1):148-168.  
12  
13  
14 866 (48) WHO. A Conceptual Framework for Action on the Social Determinants of Health: Discussion  
15 867 paper for the Commission on Social Determinants of Health: DRAFT. 2007.  
16  
17 868 (49) Soor W, Man D, Ndiaye P, Dkhimi F, van de Pas R, Criel B. Towards universal coverage in the  
18 869 majority world: Transversal findings & lessons learnt, a summary. Antwerp, Belgium: ITG; 2015.  
19  
20 870 (50) Kabir A, Farhana N, Akter F, Jesmin S, Ali A. Sweeping practices, perceptions and knowledge  
21 871 about occupational safety and health hazards of street sweepers in Dhaka city, Bangladesh: a  
22 872 qualitative inquiry . *Int J Community Med Public Health* 2015; 2(3):237-243.  
23  
24  
25 873 (51) Bamba C, Gibson M, Sowden A, Wright K, Whitehead M, Petticrew M. Tackling the wider social  
26 874 determinants of health and health inequalities: evidence from systematic reviews. *J Epidemiol*  
27 875 *Community Health* 2010; 64(4):284-291.  
28  
29 876 (52) Desai S, Dubey A. Caste in 21st Century India: Competing Narratives. *Econ Polit Wkly* 2012;  
30 877 46(11):40-49.  
31  
32 878 (53) Health System of Bangladesh. Online resource [ 2014 [cited 2014 May 23]; Available from:  
33 879 URL:<http://www.bangladesh.gov.bd/?q=en/health-care-systems-bangladesh>  
34  
35  
36 880 (54) Wilkinson RG. Socioeconomic determinants of health. Health inequalities: relative or absolute  
37 881 material standards? *BMJ* 1997; 314(7080):591-595.  
38  
39 882 (55) Borooah VK. Inequality in health outcomes in India: The role of caste and religion. 2010.  
40  
41 883 (56) Sen G, Iyar A, George A. Systematic hierarchies and Systemic failures: Gender and Health  
42 884 Inequities in Koppal District. 2006.  
43  
44 885 (57) Johnston HB. Addressing social exclusion: analyses from South Asia and southern Africa. *J Health*  
45 886 *Popul Nutr* 2009; 27(4):423-425.  
46 887  
47  
48  
49 888  
50  
51  
52  
53  
54  
55  
56  
57  
58  
59  
60

1  
2  
3  
4  
5  
6  
7  
8  
9  
10  
11  
12  
13  
14  
15  
16  
17  
18  
19  
20  
21  
22  
23  
24  
25  
26  
27  
28  
29  
30  
31  
32  
33  
34  
35  
36  
37  
38  
39  
40  
41  
42  
43  
44  
45  
46  
47  
48  
49  
50  
51  
52  
53  
54  
55  
56  
57  
58  
59  
60

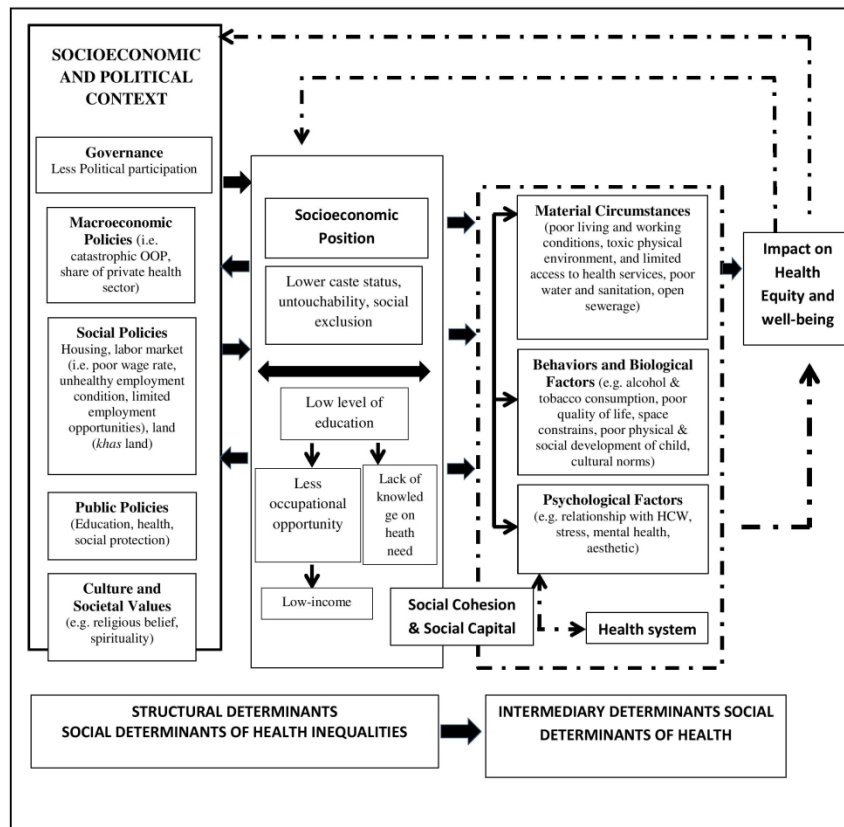

215x279mm (300 x 300 DPI)

## Standards for Reporting Qualitative Research (SRQR)\*

Page/line no(s).

|                                                                                                                                                                                                                                                                                                                                                                                                                                                                                                                                                                                                                                                                                                                                                                                                                                                                                                                                                                                                                                                                                                                                                                                                                                                                                                                                                                                                                                                                                                                                                                   |  |
|-------------------------------------------------------------------------------------------------------------------------------------------------------------------------------------------------------------------------------------------------------------------------------------------------------------------------------------------------------------------------------------------------------------------------------------------------------------------------------------------------------------------------------------------------------------------------------------------------------------------------------------------------------------------------------------------------------------------------------------------------------------------------------------------------------------------------------------------------------------------------------------------------------------------------------------------------------------------------------------------------------------------------------------------------------------------------------------------------------------------------------------------------------------------------------------------------------------------------------------------------------------------------------------------------------------------------------------------------------------------------------------------------------------------------------------------------------------------------------------------------------------------------------------------------------------------|--|
| <p><b>Title</b> - Qualitative exploration of socio-cultural determinants of health inequities of Dalit population in Bangladesh</p>                                                                                                                                                                                                                                                                                                                                                                                                                                                                                                                                                                                                                                                                                                                                                                                                                                                                                                                                                                                                                                                                                                                                                                                                                                                                                                                                                                                                                               |  |
| <p><b>Abstract</b></p> <p>Dalits (<i>jaat</i> sweepers), a marginalised traditional working community, have relatively poor access to healthcare services. This study sought to explore the socio-political and cultural factors associated with health inequalities among Dalits in an urban setting.</p> <p>An exploratory qualitative study design was adopted. The acquired data was analysed using an iterative approach which incorporated deductive and inductive methods in identifying codes and themes.</p> <p>This study was conducted in two sweeper communities in Dhaka city. Participants were Dalit men and women (fourteen in-depth interviews, mean age±SD 30±10; and five focus group discussions), and the community leaders and NGO workers (seven key informant interviews).</p> <p>Dalits (untouchables) are typically considered to fall outside the caste-based social structure and existing vulnerabilities are embedded and reinforced by this identity. Dalits' experience of precarious access to healthcare or poor healthcare is an important manifestation of these inequalities and has implications for the economic and social life of Dalit populations living together in geographically constrained spaces.</p> <p>A better understanding of the precise influences of socio-cultural determinants of health inequalities is needed, together with the identification of the strategies and programmes needed to address these determinants with the aim of developing more inclusive health service delivery systems.</p> |  |

### Introduction

|                                                                                                                                                                                                                                                                                                                                                                                                                                                                                                                                                                                                                                                                                                                                                                                                                                                                                                   |  |
|---------------------------------------------------------------------------------------------------------------------------------------------------------------------------------------------------------------------------------------------------------------------------------------------------------------------------------------------------------------------------------------------------------------------------------------------------------------------------------------------------------------------------------------------------------------------------------------------------------------------------------------------------------------------------------------------------------------------------------------------------------------------------------------------------------------------------------------------------------------------------------------------------|--|
| <p><b>Problem formulation</b> – In recent years Bangladesh has achieved remarkable progress in terms of health targets. However, these advances are experienced unequally across the population, often leaving behind individuals and communities that are economically marginalised and socially excluded. Improved health services, especially those provided by the state, are not yet effectively distributed to all individuals and groups, and frequently fail to reach ethnic minorities, people living in remote areas, extremely poor individuals, slum and pavement dwellers, and other marginalised groups. Several studies in Bangladesh have highlighted the socio-economic issues and discrimination encountered by the Dalit population; however, the socio-political and cultural factors that contribute to generating severe health inequalities remain largely unexplored.</p> |  |
| <p><b>Purpose or research question</b> – To explore the political, social, economic, and cultural determinants of health inequalities experienced by the majority of the Dalit population.</p>                                                                                                                                                                                                                                                                                                                                                                                                                                                                                                                                                                                                                                                                                                    |  |

## Methods

|                                                                                                                                                                                                                                                                                                                                                                                                                                                                                                                                                                                                                                                                                                                                                                                                                                        |  |
|----------------------------------------------------------------------------------------------------------------------------------------------------------------------------------------------------------------------------------------------------------------------------------------------------------------------------------------------------------------------------------------------------------------------------------------------------------------------------------------------------------------------------------------------------------------------------------------------------------------------------------------------------------------------------------------------------------------------------------------------------------------------------------------------------------------------------------------|--|
| <p><b>Qualitative approach and research paradigm</b> – We adopted a qualitative approach (phenomenological). ‘Commission on Social Determinants of Health (CSDH) Conceptual Framework’ proposed by the World Health Organization (WHO) in 2010 guided our analysis.</p>                                                                                                                                                                                                                                                                                                                                                                                                                                                                                                                                                                |  |
| <p><b>Researcher characteristics and reflexivity</b> – Three researchers graduated in anthropology and public health conducted interviews, performed analysis, report the finding. The researchers have a vast experience in qualitative research. We adhered to the trustworthiness by applying four principles—credibility, transferability, conformability, and dependability. We used inter-coder or synchronic reliability that refers to the amount of agreement between independent coders of the data. We measured the agreement during the analysis when the researchers’ coded same interviews independently. We furthermore performed triangulation between methods, and participants.”</p>                                                                                                                                 |  |
| <p><b>Context</b> – This study was conducted in two sweeper communities in Dhaka city: the <i>Agargaon</i> Public Works Department (PWD) Sweeper Colony, and the Ganaktuli sweeper colony located in the city’s Hazaribagh area. Commonly, the sweepers in Agargaon and Ganakatuli are known as <i>Telegu</i> and <i>Kanpuri</i>, respectively. There are no official statistics providing precise population figures for these colonies, although secondary sources indicate that each includes approximately 1,000 families</p>                                                                                                                                                                                                                                                                                                      |  |
| <p><b>Sampling strategy</b> - Using several data collection tools we achieved maximum variation within the sample, purposefully collecting data from participants with various backgrounds, e.g. differing in terms of age, occupation, gender, position within the household, status within the community (leaders), and members of non-governmental organisations (NGOs, henceforth)</p>                                                                                                                                                                                                                                                                                                                                                                                                                                             |  |
| <p><b>Ethical issues pertaining to human subjects-</b> The study protocol was approved and ethical approval was obtained from the ‘ethics review committee’ at Dhaka University, Bangladesh. Written informed consent was taken and documented via audio recording. Before obtaining consent the research objectives were explained, together with the importance of the study, confidentiality rules, possible harms and benefits, and the participants’ right to withdraw from the interviews at any stage during the conversation. Confidentiality of the personal identification of all participants was strictly maintained, with these details only being used by the researchers. Data was analysed using the participant identification (ID) number only and these ID number were removed prior to reporting the findings.</p> |  |
| <p><b>Data collection methods</b> - Qualitative data was collected using 14 in-depth interviews with Dalit men and women, 5 focus group discussions with people from the Dalit community, and 7 key informant interviews. The acquired data was analysed using an iterative approach which incorporated deductive and inductive methods in identifying codes and themes.</p>                                                                                                                                                                                                                                                                                                                                                                                                                                                           |  |
| <p><b>Data collection instruments and technologies</b> – We used three data collection tools—in-depth interview (IDI), focus group discussion (FGD), and key informant interview (KII). We maintained maximum variation within the sample as we used purposive sampling to select the participants on the basis of key variables including age, gender and occupation.</p>                                                                                                                                                                                                                                                                                                                                                                                                                                                             |  |

|    |                                                                                                                                                                                                                                                                                                                                                                                                                                                                                                                                                                                                                                                                                                                                                        |  |
|----|--------------------------------------------------------------------------------------------------------------------------------------------------------------------------------------------------------------------------------------------------------------------------------------------------------------------------------------------------------------------------------------------------------------------------------------------------------------------------------------------------------------------------------------------------------------------------------------------------------------------------------------------------------------------------------------------------------------------------------------------------------|--|
| 1  | <b>Units of study</b> – Socio demographic and contextual characteristics were explained to provide a deeper understanding of the phenomena. Individual health seeking experience was described accordingly.                                                                                                                                                                                                                                                                                                                                                                                                                                                                                                                                            |  |
| 2  |                                                                                                                                                                                                                                                                                                                                                                                                                                                                                                                                                                                                                                                                                                                                                        |  |
| 3  |                                                                                                                                                                                                                                                                                                                                                                                                                                                                                                                                                                                                                                                                                                                                                        |  |
| 4  | <b>Data processing</b> - The analysis process was adequately accomplished by the team of researchers, who have different educational backgrounds and training, through regular collaboration and discussions, self-reflexivity, and triangulation of method and context (field sites), ensuring that no one researcher’s view was predominant.                                                                                                                                                                                                                                                                                                                                                                                                         |  |
| 5  |                                                                                                                                                                                                                                                                                                                                                                                                                                                                                                                                                                                                                                                                                                                                                        |  |
| 6  |                                                                                                                                                                                                                                                                                                                                                                                                                                                                                                                                                                                                                                                                                                                                                        |  |
| 7  |                                                                                                                                                                                                                                                                                                                                                                                                                                                                                                                                                                                                                                                                                                                                                        |  |
| 8  | <b>Data analysis</b> - To analyse the qualitative data we used an iterative approach which blended deductive and inductive methods to identify and generate codes and themes. Initially, a deductive approach was used through the use of interview guides, which provided a primary template for the framework of data coding. The researchers independently read and reread a few transcripts and identified codes which were incorporated into the coding framework in an inductive form which mirrored the ideas, perceptions, practices, and concepts, concentrating on the health and health services of the participants. After coding all of the interviews we looked for clusters of several codes, which were termed ‘themes’ or ‘concepts’. |  |
| 9  |                                                                                                                                                                                                                                                                                                                                                                                                                                                                                                                                                                                                                                                                                                                                                        |  |
| 10 |                                                                                                                                                                                                                                                                                                                                                                                                                                                                                                                                                                                                                                                                                                                                                        |  |
| 11 |                                                                                                                                                                                                                                                                                                                                                                                                                                                                                                                                                                                                                                                                                                                                                        |  |
| 12 |                                                                                                                                                                                                                                                                                                                                                                                                                                                                                                                                                                                                                                                                                                                                                        |  |
| 13 |                                                                                                                                                                                                                                                                                                                                                                                                                                                                                                                                                                                                                                                                                                                                                        |  |
| 14 |                                                                                                                                                                                                                                                                                                                                                                                                                                                                                                                                                                                                                                                                                                                                                        |  |
| 15 |                                                                                                                                                                                                                                                                                                                                                                                                                                                                                                                                                                                                                                                                                                                                                        |  |
| 16 |                                                                                                                                                                                                                                                                                                                                                                                                                                                                                                                                                                                                                                                                                                                                                        |  |
| 17 |                                                                                                                                                                                                                                                                                                                                                                                                                                                                                                                                                                                                                                                                                                                                                        |  |
| 18 | <b>Techniques to enhance trustworthiness</b> - “In this study, we adhered to the trustworthiness by applying four principles—credibility, transferability, conformability, and dependability. We used inter-coder or synchronic reliability that refers to the amount of agreement between independent coders of the data. We measured the agreement during the analysis when the researchers’ coded same interviews independently. We furthermore performed triangulation between methods, and participants.”                                                                                                                                                                                                                                         |  |
| 19 |                                                                                                                                                                                                                                                                                                                                                                                                                                                                                                                                                                                                                                                                                                                                                        |  |
| 20 |                                                                                                                                                                                                                                                                                                                                                                                                                                                                                                                                                                                                                                                                                                                                                        |  |
| 21 |                                                                                                                                                                                                                                                                                                                                                                                                                                                                                                                                                                                                                                                                                                                                                        |  |
| 22 |                                                                                                                                                                                                                                                                                                                                                                                                                                                                                                                                                                                                                                                                                                                                                        |  |
| 23 |                                                                                                                                                                                                                                                                                                                                                                                                                                                                                                                                                                                                                                                                                                                                                        |  |
| 24 |                                                                                                                                                                                                                                                                                                                                                                                                                                                                                                                                                                                                                                                                                                                                                        |  |
| 25 |                                                                                                                                                                                                                                                                                                                                                                                                                                                                                                                                                                                                                                                                                                                                                        |  |

## Results/findings

|    |                                                                                                                                                                                                                                                                                                                                                                                                                                                                                                                                                                                                           |  |
|----|-----------------------------------------------------------------------------------------------------------------------------------------------------------------------------------------------------------------------------------------------------------------------------------------------------------------------------------------------------------------------------------------------------------------------------------------------------------------------------------------------------------------------------------------------------------------------------------------------------------|--|
| 26 |                                                                                                                                                                                                                                                                                                                                                                                                                                                                                                                                                                                                           |  |
| 27 |                                                                                                                                                                                                                                                                                                                                                                                                                                                                                                                                                                                                           |  |
| 28 |                                                                                                                                                                                                                                                                                                                                                                                                                                                                                                                                                                                                           |  |
| 29 | <b>Synthesis and interpretation</b> - The health status of members of these Dalit groups is determined by an array of social, economic and political factors. As Dalits (untouchables) are typically considered to fall outside the caste-based social structure and existing vulnerabilities are embedded and reinforced by this identity. Dalits’ experience of precarious access to healthcare or poor healthcare is an important manifestation of these inequalities and has implications for the economic and social life of Dalit populations living together in geographically constrained spaces. |  |
| 30 |                                                                                                                                                                                                                                                                                                                                                                                                                                                                                                                                                                                                           |  |
| 31 |                                                                                                                                                                                                                                                                                                                                                                                                                                                                                                                                                                                                           |  |
| 32 |                                                                                                                                                                                                                                                                                                                                                                                                                                                                                                                                                                                                           |  |
| 33 |                                                                                                                                                                                                                                                                                                                                                                                                                                                                                                                                                                                                           |  |
| 34 |                                                                                                                                                                                                                                                                                                                                                                                                                                                                                                                                                                                                           |  |
| 35 |                                                                                                                                                                                                                                                                                                                                                                                                                                                                                                                                                                                                           |  |
| 36 |                                                                                                                                                                                                                                                                                                                                                                                                                                                                                                                                                                                                           |  |
| 37 |                                                                                                                                                                                                                                                                                                                                                                                                                                                                                                                                                                                                           |  |
| 38 | <b>Links to empirical data</b> – quotes were used in the result sections where it suits best.                                                                                                                                                                                                                                                                                                                                                                                                                                                                                                             |  |
| 39 |                                                                                                                                                                                                                                                                                                                                                                                                                                                                                                                                                                                                           |  |
| 40 |                                                                                                                                                                                                                                                                                                                                                                                                                                                                                                                                                                                                           |  |
| 41 |                                                                                                                                                                                                                                                                                                                                                                                                                                                                                                                                                                                                           |  |
| 42 |                                                                                                                                                                                                                                                                                                                                                                                                                                                                                                                                                                                                           |  |

## Discussion

|    |                                                                                                                                                                                                                                                                                                                                                                                                                                                                                                                                                                               |  |
|----|-------------------------------------------------------------------------------------------------------------------------------------------------------------------------------------------------------------------------------------------------------------------------------------------------------------------------------------------------------------------------------------------------------------------------------------------------------------------------------------------------------------------------------------------------------------------------------|--|
| 43 |                                                                                                                                                                                                                                                                                                                                                                                                                                                                                                                                                                               |  |
| 44 | <b>Integration with prior work, implications, transferability, and contribution(s) to the field</b> - The provision of clinical healthcare services alone is insufficient to mitigate the negative effects of discriminations and to improve the health status of Dalits. A better understanding of the precise influences of socio-cultural determinants of health inequalities is needed, together with the identification of the strategies and programmes needed to address these determinants with the aim of developing more inclusive health service delivery systems. |  |
| 45 |                                                                                                                                                                                                                                                                                                                                                                                                                                                                                                                                                                               |  |
| 46 |                                                                                                                                                                                                                                                                                                                                                                                                                                                                                                                                                                               |  |
| 47 |                                                                                                                                                                                                                                                                                                                                                                                                                                                                                                                                                                               |  |
| 48 |                                                                                                                                                                                                                                                                                                                                                                                                                                                                                                                                                                               |  |
| 49 |                                                                                                                                                                                                                                                                                                                                                                                                                                                                                                                                                                               |  |
| 50 |                                                                                                                                                                                                                                                                                                                                                                                                                                                                                                                                                                               |  |
| 51 | <b>Limitations</b> - The results of this study are based on data collected from the Dalit population in Dhaka City; therefore, the results may not be transferable to other settings, for example a small Bangladeshi town. Nonetheless, considering the data collected, we believe that this study provides an in-depth understanding of a set of social, cultural, economic and political factors that strongly determine the health outcomes of Dalits.                                                                                                                    |  |
| 52 |                                                                                                                                                                                                                                                                                                                                                                                                                                                                                                                                                                               |  |
| 53 |                                                                                                                                                                                                                                                                                                                                                                                                                                                                                                                                                                               |  |
| 54 |                                                                                                                                                                                                                                                                                                                                                                                                                                                                                                                                                                               |  |
| 55 |                                                                                                                                                                                                                                                                                                                                                                                                                                                                                                                                                                               |  |
| 56 |                                                                                                                                                                                                                                                                                                                                                                                                                                                                                                                                                                               |  |
| 57 |                                                                                                                                                                                                                                                                                                                                                                                                                                                                                                                                                                               |  |
| 58 |                                                                                                                                                                                                                                                                                                                                                                                                                                                                                                                                                                               |  |
| 59 |                                                                                                                                                                                                                                                                                                                                                                                                                                                                                                                                                                               |  |
| 60 |                                                                                                                                                                                                                                                                                                                                                                                                                                                                                                                                                                               |  |

1  
2  
3  
4  
5  
6  
7  
8  
9  
10  
11  
12  
13  
14  
15  
16  
17  
18  
19  
20  
21  
22  
23  
24  
25  
26  
27  
28  
29  
30  
31  
32  
33  
34  
35  
36  
37  
38  
39  
40  
41  
42  
43  
44  
45  
46  
47  
48  
49  
50  
51  
52  
53  
54  
55  
56  
57  
58  
59  
60

**Other**

|                                                                                             |  |
|---------------------------------------------------------------------------------------------|--|
| <b>Conflicts of interest</b> - The authors declare that they have no conflicts of interest. |  |
| <b>Funding</b> - This study received no funding from any sources.                           |  |

For peer review only

# BMJ Open

## Qualitative exploration of socio-cultural determinants of health inequities of Dalit population in Dhaka City, Bangladesh

|                                 |                                                                                                                                                                                                                                                                                                                                                    |
|---------------------------------|----------------------------------------------------------------------------------------------------------------------------------------------------------------------------------------------------------------------------------------------------------------------------------------------------------------------------------------------------|
| Journal:                        | <i>BMJ Open</i>                                                                                                                                                                                                                                                                                                                                    |
| Manuscript ID                   | bmjopen-2018-022906.R3                                                                                                                                                                                                                                                                                                                             |
| Article Type:                   | Research                                                                                                                                                                                                                                                                                                                                           |
| Date Submitted by the Author:   | 27-Oct-2018                                                                                                                                                                                                                                                                                                                                        |
| Complete List of Authors:       | Kabir, Ashraf; Dushtha Shasthya Kendra , Research Maitrot, Mathilde ; The University of York, Department of Social Policy and Social Work<br>Ali, Ahsan; Dhaka University, Anthropology<br>Farhana, Nadia; Southeast University, Department of Business Administration<br>Criel, Bart; Institute of Tropical Medicine, Department of Public Health |
| <b>Primary Subject Heading</b>: | Public health                                                                                                                                                                                                                                                                                                                                      |
| Secondary Subject Heading:      | Health services research, Health policy, Qualitative research                                                                                                                                                                                                                                                                                      |
| Keywords:                       | caste, Dalit, qualitative method, sociocultural determinants, health inequalities, untouchability                                                                                                                                                                                                                                                  |
|                                 |                                                                                                                                                                                                                                                                                                                                                    |

SCHOLARONE™  
Manuscripts

1  
2  
3 1 Qualitative exploration of socio-cultural determinants of health inequities of Dalit  
4 population in Dhaka City, Bangladesh  
5

6  
7 3 **Short Title: Socio-cultural determinants of health inequities: Dalit population,**  
8  
9 4 **Bangladesh**  
10

11  
12  
13 5 Ashraful Kabir<sup>13\*</sup>,

14  
15  
16 6 Email: [ashraful.icddrb@gmail.com](mailto:ashraful.icddrb@gmail.com)  
17

18  
19 7 Mathilde Rose Louise Maitrot<sup>2</sup>

20  
21 8 Email: [Mathilde.maitrot@york.ac.uk](mailto:Mathilde.maitrot@york.ac.uk)  
22

23  
24 9 Ahsan Ali<sup>3</sup>

25  
26  
27 10 Email: [israabd@gmail.com](mailto:israabd@gmail.com)  
28

29  
30 11 [Nadia Farhana](#)<sup>4</sup>  
31

32  
33 12 Email: [nadifarhana27@yahoo.com](mailto:nadifarhana27@yahoo.com)  
34

35  
36 14 [Bart Criel](#)<sup>5</sup>  
37

38  
39 15 Email: [bcriel@itg.be](mailto:bcriel@itg.be)  
40  
41  
42  
43  
44  
45

46 18 <sup>1</sup>Dushtha Shasthya Kendra, Dhaka, Bangladesh  
47

48  
49 19 <sup>2</sup>Department of Social Policy and Social Work, University of York, United Kingdom  
50

51  
52 20 <sup>3</sup>Department of Anthropology, Dhaka University, Bangladesh  
53

54  
55 21 <sup>4</sup>Southeast University, Dhaka, Bangladesh  
56  
57  
58  
59  
60



1  
2  
3 23 <sup>5</sup>Department of Public Health, Institute of Tropical Medicine, Antwerp, Belgium  
4  
5

6 24 **\*Corresponding author**  
7

8  
9 25 Email: [ashraful.icddrb@gmail.com](mailto:ashraful.icddrb@gmail.com)  
10  
11  
12  
13  
14  
15  
16  
17  
18  
19  
20  
21  
22  
23  
24  
25  
26  
27  
28  
29  
30  
31  
32  
33  
34  
35  
36  
37  
38  
39  
40  
41  
42  
43  
44  
45  
46  
47  
48  
49  
50  
51  
52  
53  
54  
55  
56  
57  
58  
59  
60

For peer review only

## 26 ABSTRACT

27 **Objectives:** In recent years Bangladesh has made remarkable advances in health outcomes;  
28 however, the benefits of these gains are unequally shared amongst citizens and population  
29 groups. Dalits (*jaat* sweepers), a marginalised traditional working community, have relatively  
30 poor access to healthcare services. This study sought to explore the socio-political and cultural  
31 factors associated with health inequalities among Dalits in an urban setting.

32 **Design:** An exploratory qualitative study design was adopted. Fourteen in-depth interviews, five  
33 focus group discussions, and seven key informant interviews were conducted. The acquired data  
34 was analysed using an iterative approach which incorporated deductive and inductive methods in  
35 identifying codes and themes.

36 **Settings:** This study was conducted in two sweeper communities in Dhaka city.

37 **Participants:** Participants were Dalit men and women (in-depth interviews, mean age $\pm$ SD  
38 30 $\pm$ 10; and focus group discussions), and the community leaders and NGO workers (key  
39 informant interviews).

40 **Results:** The health status of members of these Dalit groups is determined by an array of social,  
41 economic and political factors. Dalits (untouchables) are typically considered to fall outside the  
42 caste-based social structure and existing vulnerabilities are embedded and reinforced by this  
43 identity. Dalits' experience of precarious access to healthcare or poor healthcare is an important  
44 manifestation of these inequalities and has implications for the economic and social life of Dalit  
45 populations living together in geographically constrained spaces.

1  
2  
3 46 **Conclusions:** The provision of clinical healthcare services alone is insufficient to mitigate the  
4  
5 47 negative effects of discriminations and to improve the health status of Dalits. A better  
6  
7 48 understanding of the precise influences of socio-cultural determinants of health inequalities is  
8  
9 49 needed, together with the identification of the strategies and programmes needed to address these  
10  
11 50 determinants with the aim of developing more inclusive health service delivery systems.  
12  
13

14  
15 51 **Key Words:** Bangladesh; caste; Dalit; qualitative method; sociocultural determinants; health  
16  
17 52 inequalities; social exclusion; untouchability  
18  
19  
20

### 21 53 **Strengths and limitations of this study**

- 22  
23 54 • This study used the ‘Commission on Social Determinants of Health Conceptual  
24  
25 55 Framework’ proposed by the World Health Organization (WHO) which allow us to  
26  
27 56 investigate how a set of social, cultural, economic and political elements interact and play  
28  
29 57 a determining role in shaping Dalits’ health status.  
30  
31 58 • To the best of our knowledge this is the first study that comprehensively examines how  
32  
33 59 socio-cultural and political elements are interconnected, and how they produce, sustain,  
34  
35 60 and reinforce health inequality among the Dalit population in Bangladesh.  
36  
37 61 • To analyse the qualitative data we used an iterative approach which blended deductive  
38  
39 62 and inductive methods to identify and generate codes and themes.  
40  
41 63 • The main limitation is that the sample size is unavoidably small; therefore, the  
42  
43 64 generalizability of the findings to other areas might be limited due to the contextual  
44  
45 65 characteristics. Nonetheless, considering the data collected, we believe that this study  
46  
47 66 provides an in-depth understanding of the determinants of health inequalities among Dalit  
48  
49 67 population in Bangladesh.  
50  
51  
52  
53  
54  
55  
56  
57  
58  
59  
60

1  
2  
3  
4  
5  
6  
7  
8  
9  
10  
11  
12  
13  
14  
15  
16  
17  
18  
19  
20  
21  
22  
23  
24  
25  
26  
27  
28  
29  
30  
31  
32  
33  
34  
35  
36  
37  
38  
39  
40  
41  
42  
43  
44  
45  
46  
47  
48  
49  
50  
51  
52  
53  
54  
55  
56  
57  
58  
59  
60

68

For peer review only

## 69 BACKGROUND

70 In recent years Bangladesh has achieved remarkable progress in terms of health targets, with  
71 declining maternal and neonatal mortality rates, increased immunisation coverage, greater life  
72 expectancy at birth, and increased vitamin A supplementation <sup>1;2</sup>. However, these advances are  
73 experienced unequally across the population, often leaving behind individuals and communities  
74 that are economically marginalised and socially excluded. Improved health services, especially  
75 those provided by the state, are not yet effectively distributed to all individuals and groups, and  
76 frequently fail to reach ethnic minorities, people living in remote areas, extremely poor  
77 individuals, slum and pavement dwellers, and other marginalised groups <sup>3</sup>. This paper focuses on  
78 analysing the healthcare barriers experienced by one marginalised group, the Dalits, the  
79 untouchables.

80 Bob et al. <sup>4</sup> explain that the word 'Dalit' comes from the Marathi language and means  
81 suppressed, 'broken up', downtrodden or oppressed, and the term was first used by Dr B. R.  
82 Ambedkar during the late period of British colonial rule. The Dalits of Bangladesh are a  
83 marginalised group whose identity is often characterised by the manual and low-status nature of  
84 their occupations. This identity and social status are strongly associated with their ancestral  
85 occupations, which were typically considered unclean and impure. In the 1872 census conducted  
86 in Bengal, the majority of Dalits were referred to by the term *Chandala*, a Sanskrit word for  
87 someone who deals with the disposal of corpses, a Hindu outcaste. In 2017 they are often called  
88 *Harijan*, a term coined by Mahatma Gandhi meaning 'children of God', or more commonly  
89 referred to by their occupation, family descent, ethnicity, or derogatory terms. The dalits often  
90 engage in sweeping activities, such as cleaning latrines, removing rubbish, skinning cattle, and

1  
2  
3 91 sweeping streets and houses. They scavenge in Bangladesh's cities and towns, and are  
4  
5 92 designated as 'untouchable' within the caste system of the Indian subcontinent <sup>5,6</sup>.

6  
7  
8 93 Healthcare issues of the Dalit population in Bangladesh remain largely neglected in the national  
9  
10 94 government's development agenda <sup>7,8</sup>, despite its strong constitutional commitment to 'not  
11  
12 95 discriminate against any citizen on grounds only of religion, race, caste, sex or place of birth'  
13  
14 96 (The Bangladesh Constitution of 1972, Article 28 (1). Although available literature <sup>9-11</sup> (i.e.  
15  
16 97 Bangladesh Demographic and Health Survey, Bangladesh Urban Health Survey) does not  
17  
18 98 present nationally representative demographic and survey data to demonstrate how extensively  
19  
20 99 the healthcare access, and health and nutritional outcomes differ statistically between Dalit and  
21  
22 100 other non-Dalit population in Dhaka city, some study reports indicate that Dalit have poor health  
23  
24 101 outcome across the population in slum and other settings <sup>12-15</sup>. For example, Nagorik Uddyog  
25  
26 102 (Bangladesh Dalit and Excluded Rights Movement) notes:

27  
28  
29  
30  
31  
32 103 *"Health surveys and research programmes undertaken with respect to the 'public health*  
33  
34 104 *situation' in the country do not pay special attention to the child and maternal health*  
35  
36 105 *conditions in the colonies and settlements where Dalit communities live. Because of this*  
37  
38 106 *non-attention to their specific health situation, their suffering and specific requirements*  
39  
40 107 *to access non-discriminatory and affordable health care remain unreported and*  
41  
42 108 *unattended to."*<sup>15</sup>

43  
44  
45  
46  
47 109 . Chowdhury reported that Dalit are generally afflicted by skin diseases, diarrhea, tuberculosis,  
48  
49 110 pneumonia at a higher level than the non-Dalit population <sup>13</sup>. Islam et al. <sup>14</sup> reported that water-  
50  
51 111 borne disease are highly prevalent among Dalit population as water and sanitation facilities is  
52  
53 112 scarce in the slum— with reports of nearly 12,000 Dalit sharing two water points in Dhaka, and

1  
2  
3 113 nearly 58% of Dalit have no access to sanitary latrine <sup>13</sup>. A study conducted outside the capital  
4  
5 114 city, found that in a Dalit community in Jessore city around half of pre-school children were  
6  
7 115 suffering from chronic stunted (58%) and underweight (45%), while nationally the  
8  
9 116 corresponding figure is 36% and 33% <sup>12;16</sup>. While no precise official statistics are available  
10  
11 117 regarding the number of Dalits, various sources estimate the population at around 5.5 million <sup>17</sup>,  
12  
13 118 approximately 3-4% of Bangladesh's total population. The lack of official data on this  
14  
15 119 population group indicates the lack of political will to recognise Dalits and the existence of these  
16  
17 120 communities in Bangladesh.

18  
19  
20  
21  
22 121 Prior studies indicate that health inequalities are determined by broader societal factors, such as  
23  
24 122 socio-economic position, housing conditions, working environment, poverty, access to and  
25  
26 123 control of resources, education, and employment <sup>18-22</sup>. A firm understanding of sociocultural  
27  
28 124 determinants of health inequalities, and also of the factors which restrict access to health  
29  
30 125 services, is critical to improving the health outcomes of marginalised communities, <sup>23</sup>. Several  
31  
32 126 studies in Bangladesh have highlighted the socio-economic issues and discrimination  
33  
34 127 encountered by the Dalit population; however, the socio-political and cultural factors that  
35  
36 128 contribute to generating severe health inequalities remain largely unexplored.

37  
38  
39  
40  
41  
42 129 This present study therefore explores the political, social, economic, and cultural determinants of  
43  
44 130 health inequalities experienced by the majority of the Dalit population. We examine how caste-  
45  
46 131 based positions generate and reinforce social stratification in society, and determine health  
47  
48 132 inequities within two Dalit population groups in Bangladesh. We argue that health inequalities  
49  
50 133 need to be viewed from a holistic perspective, keeping in mind the intersecting social, political  
51  
52 134 and structural factors.

135

136

## 137 MATERIALS AND METHODS

### 138 Conceptual Framework

139 Our research was shaped by the ‘Commission on Social Determinants of Health (CSDH)  
140 Conceptual Framework’ proposed by the World Health Organization (WHO) in 2010<sup>24</sup>. This  
141 framework offers a dynamic analytical configuration of the key social institutions and political  
142 structures that affect and shape the health of a population. It explains health status as a social  
143 phenomenon that is produced, configured and sustained through a complex and dynamic  
144 interplay of a set of context-embedded factors. Importantly, it also emphasises the need to  
145 distinguish the mechanisms that generate and reproduce social hierarchies and their multiple  
146 manifestations. The conceptual framework includes three interactive levels of dynamic  
147 influences: the wider socio-political context, individual socio-economic position, and  
148 intermediary socio-economic influences.

149 **Fig 1** Commission on Social Determinants of Health (CSDH) Conceptual Framework [adapted from the  
150 WHO (2010)] [to be placed]

151

152 The first level, the socio-political context, focuses on the social relationships within a society  
153 which organise and configure hierarchies and social stratification by defining individual  
154 positions and roles. This includes the labour market, the educational system, and political  
155 institutions. The second level considers individual or groups of individuals’ positionality in



1  
2  
3 156 relation to these macro-structures and mechanisms. It understands individual socio-economic  
4  
5 157 position as a function of the degree of exposure to health risks and vulnerabilities that result in  
6  
7 158 differential health outcomes for an individual and/or a population. Key individual socio-  
8  
9 159 economic characteristics include income, education, occupation, level of knowledge and  
10  
11 160 information. Combined with structural elements, these form what is referred to as 'structural  
12  
13 161 determinant'. Thus structural determinants shape patterns of access to resources (for example  
14  
15 162 here, health services) and are rooted in socio-economic institutions, policies and political context  
16  
17 163 that construct, reinforce, and maintain social hierarchies in various social systems, institutions,  
18  
19 164 policies and sociocultural values.  
20  
21  
22  
23

24  
25 165 The intermediary socio-economic context refers to a circumstance whereby an individual and/or  
26  
27 166 group have a distinct experience of materials, behavioural options, psychological supports, and  
28  
29 167 healthcare facilities that consecutively shape specific determinants of health status (intermediary  
30  
31 168 determinants). Therefore, this framework summarises and synthesises the view that social  
32  
33 169 determinants of health inequality are constructed, functioning, and sustained through the act of  
34  
35 170 long causal interceding factors (Figure 1).  
36  
37  
38

39 171 Although other frameworks have been developed to understand the social determinants of health,  
40  
41 172 we found this conceptual framework particularly useful for exploring the dynamic relationships  
42  
43 173 between social structures and political determinants of health inequalities. Several contemporary  
44  
45 174 models, for example the psychosocial, social production of diseases/political economy of health,  
46  
47 175 and the eco-social models, tend to explain disease distribution rather than focusing on the  
48  
49 176 mechanism of disease causation <sup>25-28</sup>. Therefore, in contrast to the WHO model, these  
50  
51 177 frameworks leave contextual and socio-political aspects of health inequalities largely  
52  
53  
54  
55  
56  
57  
58

1  
2  
3 178 unexplored. The results presented in this paper are provided together with an exploration of the  
4  
5 179 socio-economic settings following the CSDH Conceptual Framework.  
6  
7

## 8 9 180 **Study Population and Settings**

10  
11 181 This study was conducted in two sweeper communities in Dhaka city: the *Agargaon* Public  
12  
13 182 Works Department (PWD) Sweeper Colony, which is located adjacent to Dhaka Orthopaedic  
14  
15 183 Hospital, and the Ganaktuli sweeper colony located in the city's Hazaribagh area. Commonly,  
16  
17 184 the sweepers in Agargaon and Ganakatuli are known as *Telegu* and *Kanpuri*, respectively. There  
18  
19 185 are no official statistics providing precise population figures for these colonies, although  
20  
21 186 secondary sources indicate that each includes approximately 1,000 families <sup>17</sup>.  
22  
23  
24  
25

## 26 187 **Sampling Strategy**

27  
28  
29 188 Between August and October 2014 the first author conducted interviews and focus group  
30  
31 189 discussions (FGDs, henceforth) with members of these Dalit *colonies*. We applied an inclusion  
32  
33 190 criterion—that participants were aged 18 and above and volunteered to participate—and  
34  
35 191 purposively recruited the study participants to address the research objectives. In this process, we  
36  
37 192 invited individuals who showed a proactive interest to share their experiences, opinions, and  
38  
39 193 time. Using several data collection tools, we purposefully collected data from participants with  
40  
41 194 various backgrounds (e.g. different age groups, occupations, genders, position within the  
42  
43 195 households, status within the community [leaders], and members of non-governmental  
44  
45 196 organisations [NGOs], henceforth). In this process, we achieved maximum variation among the  
46  
47 197 participants.. <sup>29</sup>.  
48  
49  
50  
51  
52

53 198 We conducted 14 in-depth interviews (IDIs, henceforth) with household members from the Dalit  
54  
55 199 community who had sought healthcare in different public and private facilities. We invited  
56  
57  
58  
59

1  
2  
3 200 individuals to open group discussions on health status and health-seeking behaviour, and invited  
4  
5 201 those individuals who showed a proactive interest in the study for interviews (IDIs, FGDs). The  
6  
7 202 context in which the research was conducted required a high degree of iteration and flexibility in  
8  
9 203 order to build coherence and maximise the validity of the data collected. For example, as part of  
10  
11 204 the sampling strategy, a subtype of purposive sampling known as snowballing or chain sampling  
12  
13 205 <sup>30</sup> was used to select individuals who had experienced discrimination of a specific nature or  
14  
15 206 means.

16  
17  
18  
19  
20 207 We also conducted seven key informant interviews (KIIs, henceforth) with community and  
21  
22 208 religious leaders, and also NGO workers, in order to better understand the exclusion process  
23  
24 209 experienced by Dalits in these specific locations. Finally, we conducted five FGDs to help  
25  
26 210 understand communal perceptions and attitudes regarding entitlement to access basic public  
27  
28 211 services. We have selected the key informants on the basis two criteria—information depth (who  
29  
30 212 have rich/depth information about the Dalit health aspect), and voluntary participation (who are  
31  
32 213 willing to participate in the interview voluntarily). In case of selecting FGDs participant we  
33  
34 214 considered age, gender, occupation, and volunteer participation. In addition, the authors used  
35  
36 215 participant observations and informal conversations with some non-Dalit (converted Muslim)  
37  
38 216 individuals who lived in the area to further understand the dynamics at play. Many of these  
39  
40 217 informants operated small businesses (e.g. tea stall, plastic shop, video game shop etc.) within  
41  
42 218 and around the sweeper colonies. Finally, we re-visited the participant groups to triangulate the  
43  
44 219 emerging themes and cross-check the accuracy of the data collected. The data collection process  
45  
46 220 ceased when the authors reached a suitable understanding of the key specific historical, socio-  
47  
48 221 cultural belief systems influencing the process of discrimination, marginalisation and  
49  
50 222 stigmatisation <sup>31,32</sup>.

## 223 **Data Collection Procedure**

224 In order to gather information in a semi-structured and systematic manner, we developed an  
225 interview schedule. This document was used to guide conversations around key dimensions  
226 relevant to our research questions and objectives, including socio-economic, demographic, and  
227 political issues that impact upon health conditions among the Dalit population and/or individuals.  
228 Interviews were semi-structured in order to create a friendly rapport with respondents and leave  
229 sufficient space for other themes to emerge. Open-ended questions were used to explore the  
230 socio-political and economic factors affecting their health services. For example, we wanted to  
231 learn more about participants' healthcare-seeking behaviours, experiences when attempting to  
232 access healthcare facilities, health information, and interactions with healthcare workers.

233 We conducted all except one of the interviews and FDGs in Bengali, a language spoken by the  
234 researchers (first author) and most of the participants, while an interpreter was used to interview  
235 elderly Dalit men and women who only spoke Telegu and Hindi. On average, IDIs lasted 45 to  
236 60 minutes and FDGs between 90 and 120 minutes. After obtaining the participants' consent,  
237 IDIs and FDGs were electronically recorded, before being transcribed verbatim and subsequently  
238 translated into English. In some cases, several follow-up visits were made to obtain missing  
239 information, as well as to enable further probing of some issues. In addition, the authors took  
240 detailed field notes during the conversations.

## 241 **Data Analysis**

242 To analyse the qualitative data we used an iterative approach which blended deductive and  
243 inductive methods to identify and generate codes and themes. Initially, a deductive approach was  
244 used through the use of interview guides, which provided a primary template for the framework

1  
2  
3 245 of data coding. The researchers independently read and reread a few transcripts and identified  
4  
5 246 codes which were incorporated into the coding framework in an inductive form which mirrored  
6  
7  
8 247 the ideas, perceptions, practices, and concepts, concentrating on the health and health services of  
9  
10 248 the participants. After coding all of the interviews we looked for clusters of several codes, which  
11  
12 249 were termed ‘themes’ or ‘concepts’. Focusing on rigour-related criteria in qualitative research,  
13  
14  
15 250 such as credibility, transferability, dependability and conformability, a consensus was established  
16  
17 251 by resolving coding differences after discussions among the research team. Throughout the  
18  
19 252 analysis, systematically examined meaningful statements were assigned to the relevant code, and  
20  
21 253 the relationship between the themes was then examined<sup>33</sup>. The analysis process was adequately  
22  
23  
24 254 accomplished by the team of researchers, who have different educational backgrounds and  
25  
26 255 training, through regular collaboration and discussions, self-reflexivity, and triangulation of  
27  
28 256 method and context (field sites), ensuring that no one researcher’s view was predominant.  
29  
30

### 31 **Patient and Public Involvement**

32  
33  
34  
35 258 In this study we did not involve any patients. The participants were not directly involved in the  
36  
37 259 design and conception of the study. However, we have plans to disseminate the results of this  
38  
39  
40 260 study with the study participants.  
41  
42

### 43 **Ethical Considerations**

44  
45  
46 262 The study protocol was approved and ethical approval was obtained from the ‘ethics review  
47  
48 263 committee’ at Dhaka University, Bangladesh. Written informed consent was taken and  
49  
50 264 documented via audio recording. Before obtaining consent the research objectives were  
51  
52  
53 265 explained, together with the importance of the study, confidentiality rules, possible harms and  
54  
55 266 benefits, and the participants’ right to withdraw from the interviews at any stage during the  
56  
57  
58  
59

267 conversation. Personal and households information, including age, sex, education, occupation,  
 268 marital status, family composition and religion, was collected; however, the confidentiality of the  
 269 personal identification of all participants was strictly maintained, with these details only being  
 270 used by the researchers. Data was analysed using the participant identification (ID) number only  
 271 and these ID number were removed prior to reporting the findings.

## 272 RESULTS

### 273 Characteristics of the Participants

274 We firstly describe the socio-demographic characteristics of the participants before presenting  
 275 our results. Table 1 shows the characteristics of the study participants, who ranged in age  
 276 between 22 and 64, and had a mean age of 30 (SD±10) years. More than half of the participants  
 277 (9 out of 14) had received no formal schooling, which is far below the national level of over  
 278 60%. Overall, participants had received a mean of 2.9 (SD±1.3) years of schooling, and only  
 279 three had received any education above the primary level.

280 **Table 1 Socio-demographic backgrounds of the in-depth interview participants (*n* = 14)**

| Characteristics                  | Study Area |           | Combined |
|----------------------------------|------------|-----------|----------|
|                                  | Agargaon   | Ganaktuli |          |
| Age in years (mean ±SD)          | 27±8       | 3±9       | 30±10    |
| <b>Education</b>                 |            |           |          |
| 1–5 years ( <i>n</i> )           | 1          | 2         | 3        |
| 6–10 years ( <i>n</i> )          | 0          | 2         | 2        |
| No formal schooling ( <i>n</i> ) | 5          | 4         | 9        |
| Schooling in years (mean ± SD)   | 2.6±1.2    | 3.4±1.4   | 2.9±1.3  |
| <b>Occupation (<i>n</i>)</b>     |            |           |          |
| Cleaning                         | 3          | 5         | 8        |
| Housewife                        | 2          | 1         | 3        |
| Others                           | 1          | 2         | 3        |
| <b>Sex (<i>n</i>)</b>            |            |           |          |

|                           |   |   |    |
|---------------------------|---|---|----|
| Male                      | 4 | 4 | 8  |
| Female                    | 2 | 4 | 6  |
| <b>Marital Status (n)</b> |   |   |    |
| Married                   | 4 | 5 | 9  |
| Unmarried                 | 2 | 2 | 4  |
| Divorced                  | 0 | 1 | 1  |
| <b>Family Type (n)</b>    |   |   |    |
| Extended                  | 4 | 6 | 10 |
| Nuclear                   | 2 | 2 | 4  |
| <b>Religion (n)</b>       |   |   |    |
| Hindu                     | 5 | 8 | 13 |
| Converted Christian       | 1 | 0 | 1  |

281 The majority of the participants were engaged in cleaning activities for Dhaka City Corporation  
 282 and private organisations, while the remainder were employed in household activities, as day  
 283 labourers, or in garment factories. More than half of the participants (10 out of 14) lived with  
 284 their extended family, and almost all (13 out of 14) were Hindu, with just one participant having  
 285 converted to Christianity.

286 Table 2 presents the key demographic characteristics of the FGD participants. Five FGDs were  
 287 conducted: (I) among 6 Agargaon Dalit men (mean age 28, SD  $\pm$  8 years), (II) among 7  
 288 Agargaon Dalit women (mean age 32, SD  $\pm$  7 years), (III) among 6 Ganaktuli Dalit men (mean  
 289 age 39, SD  $\pm$  7 years), (IV) among 8 female Ganaktuli Dalit women (mean age 24, SD  $\pm$  5  
 290 years) and (V) among 9 Ganaktuli Dalit men (mean age 35, SD  $\pm$  6 years).

291 **Table 2 Socio-demographic backgrounds of participants in the focus group discussions (n = 36)**

| Focus group discussion | Age of the participants in years (mean $\pm$ SD) | Location  | Number of Participants | Gender |
|------------------------|--------------------------------------------------|-----------|------------------------|--------|
| I                      | 28 $\pm$ 8                                       | Agargaon  | 6                      | Male   |
| II                     | 32 $\pm$ 7                                       | Agargaon  | 7                      | Female |
| III                    | 39 $\pm$ 7                                       | Ganaktuli | 6                      | Male   |
| IV                     | 24 $\pm$ 5                                       | Ganaktuli | 8                      | Female |

|   |      |           |   |      |
|---|------|-----------|---|------|
| V | 35±6 | Ganaktuli | 9 | Male |
|---|------|-----------|---|------|

292

293 The dominant recurring themes were organised into categories reflecting the majority of  
 294 interactive elements of the ‘social determinants of health’ framework (i.e. socio-economic and  
 295 political context [including governance, macroeconomic policies, social and public policies,  
 296 culture and societal values untouchability, caste-based discrimination, and social exclusion]  
 297 socio-economic position and intermediary determinants).

### 298 **Space and Power**

299 In an attempt to contextualise our findings within the wider socio-economic and political context,  
 300 this section starts by providing a brief overview of the political history of the Dalit population.  
 301 Accounts of the socio-political and economic dimensions of Dalit livelihoods helps in  
 302 understanding structural determinants of their health.

303 In Bangladesh, the majority of untouchable Hindu Dalits have Indian origins. In Bangladesh, as  
 304 in India and Nepal, untouchable Hindus belong to the lowest social position at the base of the  
 305 *Varna* system <sup>6</sup>. During the reign of the Mughals, Dhaka was established as the commercial  
 306 capital of the Bengal Subah by *Subahdar* (viceroy) Islam Khan in 1608. As the city grew to  
 307 become one of the wealthiest and most prosperous cities in the South Asian region, the Mughal  
 308 administrator appointed sweepers to maintain sanitation and cleaning activities <sup>5</sup>. In the 1620s  
 309 there was a large-scale migration of Dalit from India to Dhaka, which was precipitated by  
 310 massacres by Burmese pirates in 1624-26: they were required to remove dead bodies from the  
 311 city <sup>8</sup>. It is commonly believed that a large number of Dalits were brought to the city by British  
 312 colonial administrators after Dhaka gained municipality status, to provide menial services <sup>8</sup>.



1  
2  
3 313 During the period of British colonial rule (1757-1947), Dalits (Telegu-speaking and Kanpuri  
4  
5 314 sweepers) were brought to East Bengal (now Bangladesh) from the Indian states of Uttar  
6  
7 315 Pradesh, Bihar, Andhra Pradesh and many other areas, including Bhagalpur, Motihari, Baliha,  
8  
9 316 Patna, Maddaparpur, Uriya, Gourakpur and Chapra <sup>5;13</sup>. As the English administration rapidly  
10  
11 317 developed townships and local municipalities, these populations were moved to meet the  
12  
13 318 increasing need for sanitation workers.  
14  
15  
16  
17

18 319 The social position and status of Dalits are associated with their ancestral occupations, which  
19  
20 320 were regarded as impure. Dalits are mostly employed by public and private organisations for  
21  
22 321 sweeping activities, cleaning latrines, removing filth, skinning cattle, sweeping streets and  
23  
24 322 houses. Despite the lack of official data on the economic condition of Dalits, some secondary  
25  
26 323 sources claim that Dalits are engaged in low-paid manual work under severe discriminatory  
27  
28 324 terms <sup>13</sup>, and consequently earn much less than national average, with one source claiming that  
29  
30 325 their income lies between BDT 3000-5000 (considering BDT78=US\$1) while the national  
31  
32 326 average is BDT 7203 <sup>13</sup>. Processes of occupational discrimination and unfair payment contribute  
33  
34 327 to excluding the population from secure and safe dwellings. Dalit populations usually reside in  
35  
36 328 unhygienic environments characterised by poor quality, insufficient and irregular water,  
37  
38 329 electricity and gas provision. Overcrowded dwellings, narrow walkways, inadequate basic  
39  
40 330 facilities, such as toilets and water taps, represent significant everyday challenges that become  
41  
42 331 causes of further stigmatisation and marginalisation. Dalit populations often have to rely for  
43  
44 332 access to these services on middlemen and informal brokers, called *mastan* (local thugs); they  
45  
46 333 often rely on violence and illegal deals to negotiate access to resources. The interlacing of social  
47  
48 334 structures and political processes shape the Dalits' common everyday experiences of poverty and  
49  
50 335 constitute their shared identity.  
51  
52  
53  
54  
55  
56  
57  
58  
59  
60

1  
2  
3 336 The material circumstances of the Dalit group in Dhaka city were identified as major  
4  
5 337 intermediary determinants of their health status. Data from all this study's sources (e.g. IDIs,  
6  
7 338 FGDs and KIIs) reported poor living conditions, their concentration in government-established  
8  
9 339 slums, or so-called 'colonies', and their highly unsafe housing characterised by poor drainage,  
10  
11 340 sanitation and water supply. Houses in government colonies had brick walls and corrugated iron  
12  
13 341 sheet roofs, while those in private slums were constructed from bamboo, tin, and wood. The  
14  
15 342 sweeper slums were very overcrowded, with most respondents reporting that one small room  
16  
17 343 housed 6–10 family members spanning three generations. The environment was also highly  
18  
19 344 polluted, leading to extremely unsafe living conditions.

20  
21  
22  
23  
24  
25 345 Sweeper slums also reported extremely unhygienic and inadequate sanitation conditions <sup>14</sup>.  
26  
27 346 Bacteria, parasites, and disease vectors breed faster when sanitation and drainage systems are  
28  
29 347 poor and when warmer and wetter conditions are prevalent all year round. Such poor living  
30  
31 348 conditions are likely to increase the incidence of vector-borne/water-borne diseases and  
32  
33 349 infections<sup>13 34</sup>. For example, diarrhoea and respiratory infections, such as pneumonia, were  
34  
35 350 commonly reported as the most frequent diseases among children aged less than five years old <sup>13</sup>.  
36  
37  
38  
39 351 In addition, malaria, dengue fever, and *kala-azar* (visceral leishmaniasis) were reported to be  
40  
41 352 prevalent among all age groups.

42  
43  
44 353 The wider socio-political context influences the effects of these material circumstances and has  
45  
46 354 multiple behavioural implications. The data collected from KIIs, IDIs and FDGs clearly indicates  
47  
48 355 that health policies largely ignore the specific needs of Dalits. For example, policies concerning  
49  
50 356 housing, the labour market and land emerged as restricting factors for health. Over centuries,  
51  
52 357 Dalit populations have been allocated space in designated colonies, and Dalit families have  
53  
54 358 shared very small living spaces from generation to generation. Data from all the sources reflected

1  
2  
3 359 that, despite the potential for promoting basic housing facilities within the government owned  
4  
5 360 land, effective initiatives were never taken due to the lack of policy support. The respondents  
6  
7  
8 361 related that government policy favoured congregating Dalits in such designated colonies, rather  
9  
10 362 than facilitating actions for housing supply and availability, and improving quality. One  
11  
12 363 participant reported:

15 364 *“Government policy has never allowed any action that facilitates housing facilities*  
16  
17 365 *for Dalit. They are living like this in colonies for generations; but, neither own nor*  
18  
19  
20 366 *improve its quality.”* (A key informant in Ganaktuli)

23 367 Although the government has issued policy statements and strategies for the redistribution of  
24  
25 368 non-agriculture and agricultural *khas* land (government-owned fallow land) to landless people  
26  
27 369 since the early 1980s, Dalits have not been considered as a potential beneficiary group. More  
28  
29  
30 370 than half of the participant reported that Dalits lack political power to influence the policy  
31  
32 371 aspects in this regard. One of the participants stated

35 372 *You will see very minimal or no action taken from the govt. to solve the housing problem*  
36  
37 373 *of Dalit. I understand govt. can take necessary initiatives easily but it does not take so.*  
38  
39 374 *Why? I believe, Dalit has no power to influence govt. policy aspects. (A 46-year-old male*  
40  
41  
42 375 *in Ganaktuli)*

44  
45 376 Therefore, the scope for improving health outcomes through facilitating housing conditions for  
46  
47 377 Dalits in allocated *khas* land is constrained by government land policy. One respondent stated:

49 378 *“Landlessness is the first and foremost problem that impacts the overall wellbeing of*  
50  
51 379 *Dalit. Dalit living conditions are beyond description. But it can be improved through*  
52  
53  
54 380 *distributing khas land to Dalit as it is provided to landless people. But, it is a matter*

1  
2  
3 381 *of fact that Dalit cannot fill in the inclusion criteria set by the policy.”* (A key  
4  
5 382 informant in Agargaon)  
6  
7

8  
9 383 Furthermore, the participants, especially the community leaders and NGO workers, believed that  
10  
11 384 the lack of government interventions restricted the potential for improving living conditions,  
12  
13 385 which also affected the health status of the population.  
14  
15

## 16 386 **Education and Labour**

17  
18

19 387 An individual’s place in a given society can be described by the concept of ‘social position’, as  
20  
21 388 proposed by Evans et al. <sup>35</sup>, which is generated and maintained under a broader social context.  
22  
23 389 The social position of an individual is dynamically created by a number of elements, such as  
24  
25 390 caste, religion or gender, which transmit intergenerational discriminations and inequalities.  
26  
27 391 Similar to what Evans et al. argue, when interviewing the participants we found that Dalits’  
28  
29 392 health can be seen as an outcome that is generated from social position, whereby an individual  
30  
31 393 and/or group are unable to fully participate in society because of their socio-cultural identity. The  
32  
33 394 socio-economic context has shaped Dalits’ engagement with educational institutions; Dalits face  
34  
35 395 discrimination and are often deprived of education through various means. Our data found that  
36  
37 396 less than 30% of Dalits had received formal schooling, compared to more than 65% of the  
38  
39 397 national population. This figure tends to be even lower outside Dhaka city, as one respondent  
40  
41 398 reported:  
42  
43  
44  
45  
46

47 399 *“In Dhaka city you will find higher number of Dalit who have schooling especially*  
48  
49 400 *among the younger generation. But, the figure will drastically fall if you consider*  
50  
51 401 *among the whole number of Dalit across the country.”* (A Dalit activist and key  
52  
53 402 informant from Ganaktuli)  
54  
55  
56  
57  
58  
59  
60

1  
2  
3 403 Respondents reported that their children faced discrimination by educational institutions, for  
4  
5 404 example being denied admission to private schools, rejection and teasing by teachers or students.  
6  
7  
8 405 The school enrolment of Dalit girls has also decreased due to the practice of child marriage,  
9  
10 406 which subsequently affected sexual and reproductive health. The very low literacy rate among  
11  
12 407 Dalits resulted in little or no access to health information. One of the key informants reported:

13  
14  
15 408 *“Education is vital for improving health and general well-being. When an individual*  
16  
17 409 *lacks education, he/she eventually will be in a worse position to negotiate access to*  
18  
19  
20 410 *services and information such as nutrition. Low literacy amongst the Dalit, in turn,*  
21  
22 411 *affects their health and overall well-being negatively.”* (A key informant in  
23  
24 412 Ganaktuli)

25  
26  
27 413 The participants further reported that the low level of education nurtured significant information  
28  
29 414 asymmetries, which cause health-related misinformation, and limited occupational and income-  
30  
31 415 earning opportunities. Participants reported that, due to their being excluded from mainstream  
32  
33 416 society, Dalits were perceived to have poor levels of infant and child feeding, breastfeeding  
34  
35 417 practices, immunisation take-up, and personal and family hygiene, with an unhealthy  
36  
37 418 consumption of tobacco and alcohol, etc. One participant stated that:

38  
39  
40  
41  
42 419 *“I have little or no educational background. It might diminish my understanding of*  
43  
44 420 *things like whether and what extent things such as smoking bad for health? ...what*  
45  
46 421 *and how infant and young child should be fed? ...what are good practices for*  
47  
48 422 *washing hands?”* (A 56-year-old woman in Ganaktuli)

49  
50  
51 423 The data also revealed that little and/or no education narrows the occupational opportunities, and  
52  
53 424 subsequently results in low incomes. In addition to poor educational quality, Dalit occupational

1  
2  
3 425 opportunities are determined by other factors such as caste-based identities and heredity, and  
4  
5 426 together with poor education this reduces their chance of improving their health status.  
6  
7

8 427 The data analysis also showed how the wider structural determinants interact with and influence  
9  
10 428 the status of Dalits and their material circumstances. We found that the labour market both  
11  
12 429 dynamically excludes and adversely includes Dalits by restricting their social and occupational  
13  
14 430 mobility. The data gathered from community participants and key informants strongly suggests  
15  
16 431 that Dalit ancestral occupations have limited their skill sets and continue to force them to expose  
17  
18 432 themselves to high health risks and to rely on very low wages.  
19  
20  
21  
22

23 433 Exposure to a toxic physical environment whilst at work was commonly reported in the  
24  
25 434 interviews and group discussions. Dalits are traditionally linked to their ancestral occupations,  
26  
27 435 which were passed down from generation to generation. Consequently, the majority of Dalits are  
28  
29 436 engaged in sweeping and cleaning activities, manually handling waste material and garbage  
30  
31 437 whilst using no personal protective equipment. This exposes them to large amounts of dust, bio-  
32  
33 438 aerosols, volatile organic matter, airborne particulates, bacteria, noise, and ergonomic stress.  
34  
35 439 Multiple participants reported that sweepers frequently experience infections. As one participant  
36  
37 440 explained:  
38  
39  
40  
41

42 441 *“Dalit always carry health risk with them at workplaces as they are dealing with*  
43  
44 442 *very serious issues such as dumping garbage or removing dirt. But, they do not use*  
45  
46 443 *protective equipment. [...] We are more likely than non-Dalit to experience physical*  
47  
48 444 *injuries or develop infections.”* (A 29-year-old cleaner in Agargaon)  
49  
50  
51

52 445 Similarly, another participant noted:  
53  
54  
55  
56  
57  
58  
59  
60

1  
2  
3 446 *“Dalit sweepers don’t take any dust protective measure; therefore, they inhale it... I*  
4  
5 447 *witnessed my colleagues develop respiratory infections and other airborne*  
6  
7 448 *diseases.”* (A street sweeper in Ganaktuli)

9  
10  
11 449 Nonetheless, Dalit participants were not inclined to look for alternative occupations, as they said  
12  
13 450 there was no scope for them to work outside of these historical, marginalised social spaces.  
14  
15 451 Participants were highly aware of their role in the history of the country, and explained that they  
16  
17 452 would face significant resistance if they tried to access occupations that did not conform to their  
18  
19  
20 453 low social and political status. Occupation-based discrimination, lingering poverty, and social  
21  
22 454 stigmatisation reduced their opportunities to participate in the labour market on equal terms (in  
23  
24 455 relation to non-Dalits) and to engage with activities that were not considered ‘impure’. One FGD  
25  
26  
27 456 participant talked about how the lack of skills combined with long-established social norms  
28  
29 457 strongly discourage Dalits from engaging differently with the labour market:

30  
31  
32 458 *“We are traditionally engaged in sweeping, as my ancestors did. I have no other skill*  
33  
34 459 *except this. How can I do [anything else], for example, pulling a rickshaw or running*  
35  
36 460 *a business? Similarly, people will not come and take a cup of tea if I operate a tea*  
37  
38 461 *stall.”* (A 37 year old cleaner in Agargaon)

39  
40  
41  
42 462 This particular barrier is becoming increasingly problematic, as over 70% of the respondents  
43  
44 463 reported that their access to sweeping jobs had become highly insecure and precarious; although  
45  
46 464 initially the nature of their recruitment in sweeping activities was permanent, Dalits had more  
47  
48 465 recently had to compete for their occupation with non-traditional Muslim sweepers. Although the  
49  
50 466 city corporation’s sweeper recruitment policy states that the Dalit are given a quota, the  
51  
52 467 authorities have not adhered to this system in recent years. The frequent recruitment of non-

1  
2  
3 468 traditional sweepers by different government and non-government organisations has  
4  
5 469 considerably narrowed Dalits' employment options, leading to financial hardship:  
6  
7

8 470 *“Some proportion of sweeping is reserved in government offices. However, non-Dalit*  
9  
10 471 *sweepers are getting these jobs through bribes to political leaders and government*  
11  
12 472 *officials. Where will we go for work? We will likely have to resort to unsocial and*  
13  
14 473 *illegal activities to survive if this situation is not improved.”* (A housewife in  
15  
16 474 Agargaon)  
17  
18  
19

20 475 The lack of a sufficient and regular income limited Dalit participants' capacity to afford basic  
21  
22 476 necessities, including food, healthcare (particularly from private facilities), and education fees.  
23  
24 477 Their average monthly household income ranged from BDT 5850 to 8970 (considering  
25  
26 478 BDT78=US\$1), which was insufficient to buy three nutritious meals per day for an extended  
27  
28 479 family.  
29  
30  
31

### 32 33 480 **Politics and Relationships** 34 35

36 481 Our data has identified a set of social and political factors in the given political and governance  
37  
38 482 system that impact upon the Dalit health status through stratifying individual positions on the  
39  
40 483 basis of hierarchies of power and prestige, and access to resources. Due to their weak socio-  
41  
42 484 economic position, caste-based identity and discrimination, Dalits in the studied areas generally  
43  
44 485 have a weak power of participation in political processes, both at the national and community  
45  
46 486 level. One of the participants from Ganaktuli reported:  
47  
48  
49  
50  
51  
52  
53  
54  
55  
56  
57  
58  
59  
60



1  
2  
3 487 *“Our sweeping identity shapes our world – our work, our rights, our opportunities,*  
4  
5 488 *our limitations, it shapes everything. Hundreds of years we are living a confined life*  
6  
7 489 *in a sense that the mainstream society maintains a greater distance as we belong to*  
8  
9 490 *such a low caste. Where are we? ...In education, in health, in politics? ...nowhere.”*

10  
11  
12 491 (add details)

13  
14  
15 492 The lack of political participation generated by a lack of consideration and discrimination by  
16  
17 493 other powerful groups limited Dalits’ opportunity to voice their needs and impeded their capacity  
18  
19 494 to exercise other constitutional and human rights. Making a direct connection between political  
20  
21 495 engagement and health, one participant voiced:

22  
23  
24  
25 496 *“To my knowledge, no one from the Dalit community has appeared as a candidate in*  
26  
27 497 *any election at national or community level. Even, they are likely to be less*  
28  
29 498 *concerned about this. Such an absence in political process diminishes our capacity*  
30  
31 499 *to protect communal interest concerning health.”* (A 34-year-old Dalit in Agargaon)

32  
33  
34  
35 500 Data from interviews with key informants and group discussants indicated that factors relating to  
36  
37 501 macroeconomic policies influenced the health of Dalits. Macro level policies were considered to  
38  
39 502 be having a negative impact on their health status and health seeking capacity, and public  
40  
41 503 allocations for social protection and healthcare schemes continued to exclude people living in  
42  
43 504 urban settings. One of the key informants reflected on the situation:

44  
45  
46  
47 505 *“Government policy only provides safety-net support for poor in the rural setting.*  
48  
49 506 *However, the Dalit are concentrated on the big cities and smaller towns. ...therefore*  
50  
51 507 *we are not eligible for that.”* (A key informant in Agargaon)

1  
2  
3 508 This policy significantly affected Dalits' capacity to seek and afford treatment in settings where  
4  
5 509 they were exposed to regular health shocks and hazards. For example, in the existing health  
6  
7 510 policy, two-thirds of healthcare costs are financed via an out-of-pocket mechanism <sup>36</sup>, and the  
8  
9 511 urban poor experience limited or no healthcare support. Participants reported that having no  
10  
11 512 social protection schemes meant that they had to rely on considerable out-of-pocket healthcare  
12  
13 513 expenditure in order to access healthcare from both public and private facilities. The low  
14  
15 514 income-earning capacity of Dalits interacted directly with their individual socio-economic  
16  
17 515 condition, particularly for those suffering from chronic health conditions that required prolonged  
18  
19 516 and continuous care and medication. The inability to afford treatment was frequently reported as  
20  
21 517 an important barrier to better health by respondents suffering from cardiac issues, diabetes and  
22  
23 518 renal disease due to out-of-pocket costs. One of them said:

24  
25  
26 519 *"I have been suffering from diabetes for the past years. The doctor prescribed*  
27  
28 520 *several drugs that I imperatively need to continue taking to control my sugar levels. I*  
29  
30 521 *cannot afford such drug for rest of my life [...] you will never expect to get diabetic*  
31  
32 522 *drug free of cost."* (A street sweeper in Ganaktuli)

33  
34  
35  
36  
37  
38  
39 523 Some participants highlighted the heavy reliance on expensive private health service providers as  
40  
41 524 a significant determinant of bad health. They indicated that an individual's health status tended  
42  
43 525 to deteriorate when they needed to access healthcare services from a local private institution. A  
44  
45 526 key informant in Ganaktuli explained that local private healthcare facilities generally tended to  
46  
47 527 be better equipped than local government facilities, and increasingly played a 'vital role in  
48  
49 528 healthcare services delivery.' However, he noted:

50  
51  
52  
53 529 *"If the problem is not minimal and, you must seek consultant at private facilities this*  
54  
55 530 *involves huge expenses that are most likely beyond the capacity of Dalit. ...I know a*

1  
2  
3 531 *few individuals who have been suffering from chronic disease but fail to take care*  
4  
5 532 *from private clinics due to the cost incurred.”* (A key informant in Ganaktuli)  
6  
7

8  
9 533 Beyond the costs incurred by care, participants also identified the behaviour of healthcare  
10  
11 534 professionals in public and private facilities as barriers to their accessing better health.  
12  
13 535 Respondents shared experiences of entrenched stigmatisation and discrimination that hampered  
14  
15 536 their willingness and motivation to see a doctor, thereby generating a process of self-exclusion  
16  
17 537 from these facilities.  
18  
19

20  
21 538 The Dalit identity generates considerable caste-based discrimination, enhancing exclusion,  
22  
23 539 broadening inequalities, and restricting them from accessing healthcare. Dalit people, considered  
24  
25 540 untouchable due to their traditional employment that brings them into contact with human  
26  
27 541 excreta, dirt, garbage, bad odours, dead bodies, and other elements, are defined by others by their  
28  
29 542 impurity. One participant described how mainstream society perceives the Dalit, and the  
30  
31 543 following quote denotes how societal perceptions have been internalised by Dalits themselves:  
32  
33

34  
35 544 *“We are methar [a Bangla colloquial term signifying degradation, disgust], nothing*  
36  
37 545 *more than that. Our position can be nowhere else but at the bottom of the society.”*  
38  
39 546 (A 34-year-old scavenger in Agargaon)  
40  
41  
42

43 547 These socio-economic mechanisms and Dalits' identity interact with other factors to create  
44  
45 548 psychosocial factors that determine their health status. Due to social discrimination and  
46  
47 549 exclusion, Dalit often lose their self-worth and experience depression and shame. Such feelings  
48  
49 550 in turn lead to social isolation and further narrow individual and/or community participation in  
50  
51 551 health programmes. The participants further stated that Dalits could not fully participate in  
52  
53 552 community-based health programmes focusing on child and maternal health, the promotion of  
54  
55  
56  
57  
58  
59

1  
2  
3 553 nutrition, immunisation, sanitation and hygiene. One participant explained the situation as  
4  
5 554 follows:

6  
7  
8 555 *“Dalit are social excluded and discriminated in many ways. Due to such*  
9  
10 556 *discrimination and exclusion, they might lose self-esteem to be open-minded in*  
11  
12 557 *participation of community-led health programmes.”* (A 34-year-old cleaner in  
13  
14 558 Agargaon)

15  
16  
17  
18 559 Prejudices against the Dalits are also reproduced by healthcare workers. Most respondents  
19  
20 560 reported that healthcare workers were more likely to consider their health problems to be less  
21  
22 561 serious than those of non-Dalits in order to limit the amount of time spent with them and their  
23  
24 562 exposure to ‘impurity’. In small townships and localities outside Dhaka city, for example in  
25  
26 563 primary level healthcare facilities where Dalits are easily identified by locals, they reported being  
27  
28 564 more likely to face such prejudice and discrimination from healthcare workers. Multiple  
29  
30 565 participants echoed the following experience of visiting a health facility:

31  
32  
33  
34  
35 566 *“Sometimes we do not disclose our identity to avoid neglect and unpleasant*  
36  
37 567 *situations. ... I can tell you a tragic story about the hospital admission of a Dalit*  
38  
39 568 *woman. She was denied to get hospital admission and was kept lying on the floor of*  
40  
41 569 *the balcony because she was a Dalit. Meanwhile, she developed additional problems*  
42  
43 570 *— common cold, fever and breathing difficulties in such cold weather. Only later,*  
44  
45 571 *when we put the issue forward the hospital authority admitted her and provided a*  
46  
47 572 *bed.”* (A 51-year-old Dalit rights activist in Ganaktuli)  
48  
49  
50  
51  
52  
53  
54  
55  
56  
57  
58  
59  
60

1  
2  
3 573 Several participants described a lack of attention from healthcare workers, and difficulties in  
4  
5 574 obtaining adequate information regarding their health problems and required treatments. The  
6  
7  
8 575 following excerpt reflects this situation:

9  
10 576 *“Doctors/nurses are unwilling to discuss details regarding any health information or*  
11  
12 577 *health intervention in the facilities. They just provide minimal medicine and maintain*  
13  
14  
15 578 *indifference when asked about a health-related problem.”* (A 55-year-old leather  
16  
17 579 worker in Ganaktuli)

18  
19  
20 580 Such negligent and discriminatory behaviour on the part of healthcare providers made Dalits  
21  
22 581 hesitant to participate in health promotion activities to enhance their own health, and even  
23  
24 582 influenced their decisions to delay seeking treatment for infectious diseases. One of the key  
25  
26 583 informants explained how the socio-political position of the Dalit community impacted upon the  
27  
28 584 care-seeking behaviour of Dalits:

29  
30  
31 585 *“The Dalit live as a minority within the mainstream. All aspects of their lives – such*  
32  
33 586 *as profession, access to services, rights and obligations, decisions, and so on – are*  
34  
35 587 *determined and ascribed by these social and political contexts.”* (A NGO worker in  
36  
37 588 Ganaktuli)

38  
39  
40 589 Denied access to formal and informal safety nets, this marginalisation is reinforced by  
41  
42 590 idiosyncratic forms of discrimination based on class, gender, physical ability and age in  
43  
44 591 particular. Under-nutrition of low-income (often extreme poor) adolescent girls, pregnant  
45  
46 592 mothers and elderly widows was found to be particularly severe. Health inequalities experienced  
47  
48 593 by Dalits were also influenced by the manner in which policies are developed and translated into  
49  
50 594 practice. One key informant stated:

1  
2  
3 595 *“The state did not consider that context-specific healthcare provision might be*  
4  
5 596 *effective for providing services to this kind of disadvantaged group of people. We*  
6  
7  
8 597 *need the formulation of policies that cover the delivery of health services to the Dalit*  
9  
10 598 *and other groups of people who are in an unfavourable position to seek care.” (A*  
11  
12 599 *Dalit rights activist in Agargaon)*

13  
14  
15 600 In addition, some respondents reported that being a Dalit was associated with behaviours that  
16  
17 601 negatively affected their health. Many respondents claimed that male Dalits were likely to  
18  
19  
20 602 consume high quantities of low-quality alcohol and tobacco, noting that this behaviour can be  
21  
22 603 explained by the difficult occupations and psycho-social pressure they experienced. Exposure to  
23  
24 604 bad odours, dirt and dead organisms can induce vomiting and appetite loss, and according to  
25  
26 605 some respondents consuming alcohol and cigarettes mitigated the negative psychological and  
27  
28 606 physical effects of this type of work. Historically, Dalits have been characterised by such  
29  
30 607 depictions and so this is not new; it is beyond the scope of this research to assess the veracity of  
31  
32 608 such claims. However, what is noteworthy is how such claims serve to further stigmatise  
33  
34 609 members of this population group, who according to some respondents, are *“habituated to*  
35  
36 610 *consume alcohol and tobacco products”* as they believe it is *“a habit rooted in their*  
37  
38 611 *occupational roles and psychosocial identity”* (A 23-year-old scavenger in Agargaon). Our data  
39  
40 612 suggests that Dalit children living in marginalised settlements suffer from stigmatisation and are  
41  
42 613 therefore constrained in their physical mobility and social interactions. Although it was not  
43  
44 614 possible to measure the physical growth of children due to the nature of this study, participants  
45  
46 615 reported that children, particularly those aged under 5 years, were likely to be undernourished.  
47  
48 616 Poverty, low health information and awareness, and physical environment were reported as the  
49  
50 617 most likely causal factors for such poor physical and social development of young children.  
51  
52  
53  
54  
55  
56  
57  
58  
59  
60

1  
2  
3 618 As a response to the hostile wider socio-political context and challenging material circumstances,  
4  
5 619 traditional health practices and rituals are widely practised within the Dalit community.  
6  
7 620 Religious beliefs and spirituality influence their health status and attitudes towards seeking  
8  
9 621 treatment. It was for example found that low-income Dalits adhering to strict religious beliefs  
10  
11 622 were more likely to rely on faith-based healing for sexual and reproductive health, pregnancy  
12  
13 623 care, and infant and child feeding practices.  
14  
15  
16  
17

## 18 624 **DISCUSSION**

19  
20  
21 625 To the best of our knowledge this is the first study aimed at understanding the socio-cultural and  
22  
23 626 economic determinants of health inequalities in the Dalit population in Bangladesh, and it applies  
24  
25 627 the CSDH Conceptual Framework developed by the WHO. Our analysis suggested that the  
26  
27 628 mechanisms of social and economic discrimination that result in severe health inequalities (as  
28  
29 629 claimed by the participants) for Dalits are supported and reinforced by an array of interconnected  
30  
31 630 structural factors, including geographic marginalisation, poor living conditions, low formal  
32  
33 631 education, little political representation, poor access to resources, limited labour market  
34  
35 632 engagement, and stigmatisation. Stigmatisation was found to be pervasive, and to directly shape  
36  
37 633 relational and structural determinants of health.  
38  
39  
40  
41  
42

43 634 Dalits' occupation-based identity determines their ability to interact with non-Dalits and with the  
44  
45 635 state, and their stigmatisation as an impure, unhygienic, uneducated population group reinforces  
46  
47 636 these processes and worsens their material and psychosocial circumstances. These are identified  
48  
49 637 as significant intermediary determinants of their health status within this specific urban context  
50  
51 638 <sup>37</sup>. Our findings confirm that health inequalities are rooted in the social process, whereby  
52  
53 639 structural, contextual, and interpersonal factors intersect and influence each other <sup>38-40</sup> and build  
54  
55  
56  
57  
58  
59  
60

1  
2  
3 640 on these to show how pervasive identity-based discrimination perpetuates the causes and effects  
4  
5 641 of health inequalities.

6  
7  
8 642 Untouchability and caste-based discrimination perpetuate an exclusionary process that results in  
9  
10 643 this population belonging to a lower caste status with limited or no access to or participation in  
11  
12 644 healthcare services or health seeking behaviours, and has been similarly noted by studies  
13  
14 645 conducted in Indian societies <sup>41-45</sup>. Broadly, these socio-culturally constructed exclusionary  
15  
16 646 processes restrict Dalits' economic, political, social and cultural participation, which in turn  
17  
18 647 negatively impacts upon their health and well-being at the individual, communal, regional, and  
19  
20 648 global levels. These observations are also in line with a prior report of the Social Exclusion  
21  
22 649 Knowledge Network (SEKN) to the World Health Commission on Social Determinants of  
23  
24 650 Health, which stated that sociocultural exclusion is a dynamic and multi-dimensional process  
25  
26 651 driven by unequal power relations <sup>39;42;46</sup>.

27  
28  
29 652 Our results also highlight power differentials between Dalit individuals and healthcare  
30  
31 653 professionals, which enhance health inequities and further victimise Dalits, and are in line with  
32  
33 654 the results of another study in India <sup>47</sup>. These power differentials further repress the social,  
34  
35 655 political, and economic participation of Dalits, leading to the unequal and unjust distribution of  
36  
37 656 resources and access to services. Overall, sociocultural exclusionary processes generate,  
38  
39 657 preserve, and reproduce inequalities regarding participating in, accessing, and utilising health  
40  
41 658 services, which perpetuate intergenerational deprivation and discrimination. Other studies have  
42  
43 659 demonstrated that caste-based exclusion, deprivation, and discrimination have been practised on  
44  
45 660 the Indian subcontinent for thousands of years <sup>5;47</sup>.



1  
2  
3 661 The socio-economic and political context, together with macro-policies, facilitate the  
4  
5 662 exclusionary process whereby Dalit people have limited opportunities for livelihood  
6  
7 663 development and to improve their economic condition, consequently reducing their income  
8  
9 664 opportunities and trapping them in poverty. This trap is sustained and enhanced through  
10  
11 665 intergenerational transmission. Income is strongly associated with health and influences a range  
12  
13 666 of material circumstances that directly impact health. Economic exclusion also determines access  
14  
15 667 to and utilisation of health services, while economic marginalisation appears to limit the  
16  
17 668 provision of healthcare, health-seeking behaviours, and access to other basic services provided  
18  
19 669 by members of society and the state <sup>35;48</sup>. In addition, social and public policies narrow  
20  
21 670 healthcare utilisation and healthcare-seeking, e.g. catastrophic out-of-pocket costs and the  
22  
23 671 shrunken delivery of healthcare by public health facilities. The literature shows that over the  
24  
25 672 recent years out-of-pocket costs are gradually increasing due to the steady expansion of private  
26  
27 673 healthcare services <sup>36;49</sup> and this affects healthcare seeking and utilisation. The wider structural  
28  
29 674 factors facilitate the Dalits' compromised material circumstances, unhealthy lifestyle, and social  
30  
31 675 isolation. As noted by other studies <sup>34;50;51</sup>, our findings show that poor living and working  
32  
33 676 conditions, limited healthcare access and support, poor state of water and sanitation, habit of  
34  
35 677 tobacco consumption, stress, and isolation from health services, negatively impact upon health  
36  
37 678 status and healthcare seeking. A lower social background was observed by Dubey <sup>52</sup> to  
38  
39 679 contribute to weakening social networks that perpetuate poor healthcare access and healthcare  
40  
41 680 seeking. Furthermore, the health system itself influences the health of Dalits as it presents Dalits  
42  
43 681 with greater financial costs when accessing or seeking healthcare, as noted in other studies <sup>36;53</sup>.  
44  
45 682 Moreover, access to and acceptance by healthcare providers is determined by the social position  
46  
47 683 of individuals and groups; Dalits' low social position restricts their access to healthcare  
48  
49  
50  
51  
52  
53  
54  
55  
56  
57  
58  
59

1  
2  
3 684 professionals, as had been previously reported in many regions across the world <sup>50;54;55</sup>. Our  
4  
5 685 findings suggest that the health status of the Dalit community is not shaped solely by clinical  
6  
7 686 issues but also by a range of sociocultural determinants, as proposed in several other studies <sup>14;56</sup>.  
8  
9  
10 687 For disadvantaged, marginalised, and socio-culturally excluded individuals or groups like Dalits,  
11  
12 688 health outcome improvement is closely linked to public policies and actions that address socio-  
13  
14 689 cultural determinants of health inequities, with the government playing a central role <sup>57</sup>.

## 18 690 **LIMITATIONS OF THE STUDY**

21 691 We think the limitations of this study warrant comments. Firstly, due to unavailability (we  
22  
23 692 approached some other groups to participate in the interviews but they could not participate  
24  
25 693 because either they had other commitments in the study time or did not show interest to  
26  
27 694 participate), and resource and time limitation, this study did not include the entire groups and/or  
28  
29 695 stakeholders, such as state officials, employers of Dalit population, government healthcare  
30  
31 696 providers, which might have provided alternative source of information to obtain greater level of  
32  
33 697 trustworthiness. However, we maintained a greater level of trustworthiness by applying four  
34  
35 698 principles—credibility, transferability, conformability, and dependability. Furthermore, inter-  
36  
37 699 coder or synchronic reliability referring the amount of agreement between independent coders of  
38  
39 700 the data, and triangulation between methods, and participants were used to avoid biases in this  
40  
41 701 study. Secondly, some participants might have been dominating in the group discussions which  
42  
43 702 caused other participants to feel uncomfortable sharing their own opinions and experiences  
44  
45 703 honestly. However, this limitation was mitigated by the experienced facilitators who built good  
46  
47 704 rapports and enable each person's voice to be heard by elaborating, clarifying, agreeing or  
48  
49 705 disagreeing, querying, explaining of the topic of discussion. Thirdly, the qualitative strand of this  
50  
51 706 study was geographically limited to an urban setting (Dhaka city); therefore, the results may not  
52  
53  
54  
55  
56  
57  
58  
59

1  
2  
3 707 easily be transferable across populations and places; for example, a small Bangladeshi town.  
4  
5 708 Nonetheless, considering the data collected, we believe that this study provides an in-depth  
6  
7 709 understanding of a set of social, cultural, economic and political factors that strongly determine  
8  
9 710 the health outcomes of Dalits population.  
10  
11  
12

## 13 711 **CONCLUSIONS AND IMPLICATION FOR THE STUDY**

14  
15

16  
17 712 Although this subject has previously been sporadically discussed in newspaper reports, NGO  
18  
19 713 reports and media reports, this paper is one of the first qualitative studies to explore a vast array  
20  
21 714 of factors that determine health inequalities in urban Dalit populations in Bangladesh. This study  
22  
23 715 is expected to contribute to knowledge by investigating how these elements interact and play a  
24  
25 716 determining role in shaping Dalits' health status. This study supports the view that Dalit health  
26  
27 717 inequalities are largely affected by a wide range of socio-cultural factors which can be observed  
28  
29 718 in societies across many regions of South Asia.  
30  
31  
32

33  
34 719 Importantly, we argue for the need to recognise the significant intermediary effects of everyday  
35  
36 720 discrimination and stigmatisation, perpetuated by socio-economic structures, on educational  
37  
38 721 achievement, political participation, occupations and health behaviours. Dalits' social and  
39  
40 722 political history shapes their social position in society today by limiting their power relative to  
41  
42 723 non-Dalits in key social structures, including the labour market and health institutions. These  
43  
44 724 mechanisms enhance exclusionary processes through mutually reinforcing sets of socio-cultural  
45  
46 725 and economic dynamics, and these generate, sustain, deepen, reinforce and reproduce  
47  
48 726 inequalities in the health of Dalit populations. Therefore, it is unlikely that the health status of  
49  
50 727 Dalit populations will be improved through the better clinical performance of existing healthcare  
51  
52 728 providers alone. Recognition of the hostility of existing institutions and addressing entrenched  
53  
54  
55  
56  
57  
58  
59  
60

1  
2  
3 729 exclusionary processes (including self-exclusion) and adverse inclusion is needed, together with  
4  
5 730 research on the potential benefits of developing state-initiated social protection schemes focusing  
6  
7  
8 731 on deepening the social inclusion agenda.  
9

10  
11 732  
12  
13

14  
15 733  
16  
17

18  
19 734  
20  
21

22 735  
23  
24

25  
26 736  
27  
28

29  
30 737 **Abbreviations**  
31

32  
33 738 BDT: Bangladesh Taka; CSDH: Commission on Social Determinants of Health; FGD: Focus  
34  
35 739 Group Discussions; IDI: In-depth Interviews; KII: Key Informant Interviews; NGO: Non-  
36  
37 740 governmental Organisations; PWD: Public Works Department; SEKN: Social Exclusion  
38  
39 741 Knowledge Network; WHO: World Health Organization; USD: United State Dollar;  
40  
41  
42  
43  
44  
45  
46  
47  
48  
49  
50  
51  
52  
53  
54  
55  
56  
57  
58  
59  
60

## 742 **Acknowledgements**

743 The authors would like to extend their gratitude to the Department of Anthropology, Dhaka  
744 University for their approval of this study. The authors are also grateful to the members of the  
745 two Dalit communities, and NGO workers who participated in the interviews and group  
746 discussions.

## 747 **Funding**

748 This study received no funding from any sources.

## 749 **Availability of data and materials**

750 As we informed the participants during the consent process that data would only be shared  
751 within the research team, then the data cannot be made available publicly. However, we shared  
752 the interview and discussion guidelines under 'additional supporting files.' Interested parties may  
753 contact Mr. Md. Shahin Chowdhury ([anthro.du@yahoo.com](mailto:anthro.du@yahoo.com)), Senior Administrative Assistant,  
754 Department of Anthropology, Dhaka University, for further inquiries in this regard.

## 755 **Author contributions**

756 AK, AA, and BC conceptualized the study. AK, MRLM, and NF performed analysis. AK,  
757 developed interview guidelines, interviewed participants, transcribed and translated interviews.  
758 AK, AA, NF, and MRLM drafted the initial manuscript with substantial support from BC. All  
759 authors substantially contributed to critically revising further version of the manuscript.

## 760 **Competing Interest**

1  
2  
3  
4  
5  
6  
7  
8  
9  
10  
11  
12  
13  
14  
15  
16  
17  
18  
19  
20  
21  
22  
23  
24  
25  
26  
27  
28  
29  
30  
31  
32  
33  
34  
35  
36  
37  
38  
39  
40  
41  
42  
43  
44  
45  
46  
47  
48  
49  
50  
51  
52  
53  
54  
55  
56  
57  
58  
59  
60

761 The authors declare that they have no conflicts of interest.

762 **Consent for publication**

763 Participants provided consent to publish their quotes anonymously or using pseudonyms.

764

For peer review only

## 765 Reference List

766

767 (1) El AS, Christou A, Reichenbach L, Osman FA, Azad K, Islam KS et al. Community-based  
 768 approaches and partnerships: innovations in health-service delivery in Bangladesh. *Lancet* 2013;  
 769 382(9909):2012-2026.

770 (2) Chowdhury AM, Bhuiya A, Chowdhury ME, Rasheed S, Hussain Z, Chen LC. The Bangladesh  
 771 paradox: exceptional health achievement despite economic poverty. *Lancet* 2013;  
 772 382(9906):1734-1745.

773 (3) MOHFP GoB. Health population and nutrition sector strategic plan (HPNSSP) : 2011-2016. 3rd  
 774 ed. Dhaka: Planning Wing, Ministry of Health and Family Welfare, Government of the People's  
 775 Republic of Bangladesh; 2010.

776 (4) Clifford B. Dalit Rights Are Human Rights: Caste Discrimination, International Activism, and  
 777 the Construction of a New Human Rights Issue. *Human Rights Quarterly* 2007; 29(1):167-193.

778 (5) Asaduzzaman A. The "Pariah" people: an ethnography of the urban sweepers in Bangladesh. The  
 779 University Press; 2001.

780 (6) Sultana H, Subedi DB. caste system and resistance: the case of untouchable hindu sweepers in  
 781 Bangladesh. *Int J Polit Cult Soc* 2015;1-14.

782 (7) International Dalit Solidarity Network (IDSN). Working globally against discrimination based on  
 783 work and descent. Copenhagen: IDSN; 2013. 1-51.

784 (8) Islam F. political participation of Dalit women in Dhaka city, Bangladesh. Dhaka: 2007.

785 (9) National Institute of Population Research and Training (NIPORT), Mitra and Associates.  
 786 Bangladesh Demographic and Health Survey 2014: Full Report. 1-354. 2016. Dhaka, Bangladesh  
 787 and Rockville, Maryland, USA. 10-12-2016.

788 Ref Type: Report

789 (10) National Institute of Population Research and Training (NIPORT). Bangladesh Urban Health  
 790 Survey 2013: Final Report. 2014. Dhaka, Bangladesh and Rockville, Maryland, USA. 10-15-2014.

791 Ref Type: Report

792 (11) Govindaraj R, Raju D, Secci F, Chowdhury S, Frere JJ. Health and Nutrition in Urban Bangladesh:  
 793 Social Determinants and Health Sector Governance. The World Bank; 2018.

794 (12) Roy RK. Assessment of Nutritional Status and Its Determinants Among Pre-School Children  
 795 Within Dalit Communities of Jessore City in Bangladesh: A Cross-Sectional Study. *Age* 2018;  
 796 24(35):43.

797 (13) Chowdhury IU. Caste-based Discrimination in South Asia: A Study of Bangladesh. New Delhi:  
 798 Indian Institute of Dalit Studies; 2009.

- 1  
2  
3 799 (14) Islam M, Parvez A. Dalit Initiatives in Bangladesh. Dhaka: Nagorik Uddyog & Bangladesh Dalit  
4 800 and Excluded Rights Movement; 2013.  
5  
6 801 (15) Social, economic and cultural status of dalit community in Bangladesh. 2018.  
7 802 Ref Type: Report  
8  
9  
10 803 (16) National Institute of Population Research and Training (NIPORT), Mitra and Associates, ICF  
11 804 International. Bangladesh Demographic and Health Survey:2014. 1-66. 2014. Dhaka,  
12 805 Bangladesh.  
13 806 Ref Type: Report  
14  
15 807 (17) The Life and Days of (Dalit) Sweepers in Bangladesh. The Daily Star 2006.  
16  
17 808 (18) Lundberg O. Causal explanation for class inequality in health - An empirical analysis. *Social Science*  
18 809 *& Medicine* 1991; 32(4):385-393.  
19  
20 810 (19) Davidson R, Mitchell R, Hunt K. Location, location, location: the role of experience of  
21 811 disadvantage in lay perceptions of area inequalities in health. *Health Place* 2008; 14(2):167-181.  
22  
23 812 (20) Gwatkin DR, Bhuiya A, Victora CG. Making health systems more equitable. *Lancet* 2004;  
24 813 364(9441):1273-1280.  
25  
26  
27 814 (21) Graham H. Social determinants and their unequal distribution:Clarifying policy understanding.  
28 815 *The Maibank Quarterly* 2004; 82(1):101-124.  
29  
30 816 (22) Davidson R, Kitzinger J, Hunt K. The wealthy get healthy, the poor get poorly? Lay perceptions of  
31 817 health inequalities. *Soc Sci Med* 2006; 62(9):2171-2182.  
32  
33 818 (23) Ahmed SM, Adams AM, Chowdhury M, Bhuiya A. Gender, socioeconomic development and  
34 819 health-seeking behaviour in Bangladesh. *Soc Sci Med* 2000; 51(3):361-371.  
35  
36  
37 820 (24) Solar O, Irwin A. A conceptual framework for action on the social determinants of health: Social  
38 821 Determinants of Health Discussion Paper 2 (Policy and Practice). Geneva Switzerland World  
39 822 Health Organization [WHO] 2010.; 2007.  
40  
41 823 (25) Krieger N. Theories for social epidemiology in the 21st century: an ecosocial perspective. *Int J*  
42 824 *Epidemiol* 2001; 30(4):668-677.  
43  
44 825 (26) Marmot M, Wilkinson RG. Psychosocial and material pathways in the relation between income  
45 826 and health: a response to Lynch et al. *BMJ* 2001; 322(7296):1233-1236.  
46  
47 827 (27) Smith GD, Egger M. Commentary: understanding it all--health, meta-theories, and mortality  
48 828 trends. *BMJ* 1996; 313(7072):1584-1585.  
49  
50  
51 829 (28) Wilkinson RG, Pickett KE. Income inequality and population health: a review and explanation of  
52 830 the evidence. *Soc Sci Med* 2006; 62(7):1768-1784.  
53  
54 831 (29) Anderson C. Presenting and evaluating qualitative research. *Am J Pharm Educ* 2010; 74(8):141.  
55  
56  
57  
58  
59  
60



- 1  
2  
3 832 (30) Patton MQ. Qualitative Research and Evaluation Methods , 209-339. Thousand Oaks, CA: Sage.  
4 833 Un estudio cualitativo; 2002.  
5  
6 834 (31) Guest G, Bunce A, Johnson L. How many interviews are enough? An experiment with data  
7 835 saturation and variability. *Field Methods* 2006; 18(1):59-82.  
8  
9 836 (32) Abbas T, Charles T. Handbook of mixed methods in social & behavioral research. Sage  
10 837 Publications, Thousand Oaks; 2003.  
11  
12 838 (33) Miles MB, Huberman AM. Qualitative data analysis: A sourcebook. *Beverly Hills: Sage*  
13 839 *Publications* 1994.  
14  
15 840 (34) Kumar Saha C. Dynamics of Risk Determinants Regarding Diarrhea Affected Slum Children in  
16 841 Urban Dhaka: A Dysfunctional Health Care System. *Current Research Journal of Social Sciences*  
17 842 2012; 4:304-313.  
18  
19 843 (35) Evans T, Whitehead M, Diderichsen F, Bhuiya A, Wirth M. Challenging Inequities in Health : From  
20 844 Ethics to Action. *Oxford UP* 2001.  
21  
22 845 (36) Islam A, Biswas T. Health system in Bangladesh: Challenges and opportunities. *American Journal*  
23 846 *of Health Research* 2014; 2(6):366-374.  
24  
25 847 (37) Hankivsky O. Intersectionality 101. The Institute for Intersectionality Research & Policy, SFU;  
26 848 2014.  
27  
28 849 (38) Cairney J, Veldhuizen S, Vigod S, Streiner DL, Wade TJ, Kurdyak P. Exploring the social  
29 850 determinants of mental health service use using intersectionality theory and CART analysis. *J*  
30 851 *Epidemiol Community Health* 2014; 68(2):145-150.  
31  
32 852 (39) Patil RR. Caste-, work-, and descent-based discrimination as a determinant of health in social  
33 853 epidemiology. *Soc Work Public Health* 2014; 29(4):342-349.  
34  
35 854 (40) Seng JS, Lopez WD, Sperlich M, Hamama L, Reed Meldrum CD. Marginalized identities,  
36 855 discrimination burden, and mental health: empirical exploration of an interpersonal-level  
37 856 approach to modeling intersectionality. *Soc Sci Med* 2012; 75(12):2437-2445.  
38  
39 857 (41) Mohindra KS, Haddad S, Narayana D. Women's health in a rural community in Kerala, India: do  
40 858 caste and socioeconomic position matter? *J Epidemiol Community Health* 2006; 60(12):1020-  
41 859 1026.  
42  
43 860 (42) Nayar KR. Social exclusion, caste & health: a review based on the social determinants  
44 861 framework. *Indian J Med Res* 2007; 126(4):355-363.  
45  
46 862 (43) Agarwal S, Srivastava A. Social determinants of children's health in urban areas in India. *J Health*  
47 863 *Care Poor Underserved* 2009; 20(4 Suppl):68-89.  
48  
49 864 (44) Vart P, Jaglan A, Shafique K. Caste-based social inequalities and childhood anemia in India:  
50 865 results from the National Family Health Survey (NFHS) 2005-2006. *BMC Public Health* 2015;  
51 866 15:537.  
52  
53  
54  
55  
56  
57  
58  
59  
60

- 1  
2  
3 867 (45) Baral SC, Karki DK, Newell JN. Causes of stigma and discrimination associated with tuberculosis  
4 868 in Nepal: a qualitative study. *BMC Public Health* 2007; 7:211.  
5  
6 869 (46) Kurian NJ. Widening economic & social disparities: implications for India. *Indian J Med Res* 2007;  
7 870 126(4):374-380.  
8  
9 871 (47) Sabharwal SN, Sharma S, Diwakar G D, Naik AK. Caste discrimination as a factor in poor access to  
10 872 public health service system: a case study of janani suraksha yojana scheme. *Journal of Social*  
11 873 *Inclusion Studies* 2014; 1(1):148-168.  
12  
13  
14 874 (48) WHO. A Conceptual Framework for Action on the Social Determinants of Health: Discussion  
15 875 paper for the Commission on Social Determinants of Health: DRAFT. 2007.  
16  
17 876 (49) Soors W, De Man J, Ndiaye P, Dkhimi F, van de Pas R, Criel B. Towards universal coverage in the  
18 877 majority world: Transversal findings & lessons learnt, a summary. Antwerp, Belgium: ITG; 2015.  
19  
20 878 (50) Kabir A, Farhana N, Akter F, Jesmin S, Ali A. Sweeping practices, perceptions and knowledge  
21 879 about occupational safety and health hazards of street sweepers in Dhaka city, Bangladesh: a  
22 880 qualitative inquiry . *Int J Community Med Public Health* 2015; 2(3):237-243.  
23  
24  
25 881 (51) Bamba C, Gibson M, Sowden A, Wright K, Whitehead M, Petticrew M. Tackling the wider social  
26 882 determinants of health and health inequalities: evidence from systematic reviews. *J Epidemiol*  
27 883 *Community Health* 2010; 64(4):284-291.  
28  
29 884 (52) Desai S, Dubey A. Caste in 21st Century India: Competing Narratives. *Econ Polit Wkly* 2012;  
30 885 46(11):40-49.  
31  
32 886 (53) Health System of Bangladesh. Online resource [ 2014 [cited 2014 May 23]; Available from:  
33 887 URL:<http://www.bangladesh.gov.bd/?q=en/health-care-systems-bangladesh>  
34  
35  
36 888 (54) Wilkinson RG. Socioeconomic determinants of health. Health inequalities: relative or absolute  
37 889 material standards? *BMJ* 1997; 314(7080):591-595.  
38  
39 890 (55) Borooh VK. Inequality in health outcomes in India: The role of caste and religion. 2010.  
40  
41 891 (56) Sen G, Iyar A, George A. Systematic hierarchies and Systemic failures: Gender and Health  
42 892 Inequities in Koppal District. 2006.  
43  
44 893 (57) Johnston HB. Addressing social exclusion: analyses from South Asia and southern Africa. *J Health*  
45 894 *Popul Nutr* 2009; 27(4):423-425.  
46 895  
47  
48  
49 896  
50  
51  
52  
53  
54  
55  
56  
57  
58  
59  
60

1  
2  
3  
4  
5  
6  
7  
8  
9  
10  
11  
12  
13  
14  
15  
16  
17  
18  
19  
20  
21  
22  
23  
24  
25  
26  
27  
28  
29  
30  
31  
32  
33  
34  
35  
36  
37  
38  
39  
40  
41  
42  
43  
44  
45  
46  
47  
48  
49  
50  
51  
52  
53  
54  
55  
56  
57  
58  
59  
60



215x279mm (300 x 300 DPI)

## Standards for Reporting Qualitative Research (SRQR)\*

|                                                                                                                                                                                                                                                                                                                                                                                                                                                                                                                                                                                                                                                                                                                                                                                                                                                                                                                                                                                                                                                                                                                                                                                                                                                                                                                                                                                                                                                                                                                                                                   | Page/line no(s). |
|-------------------------------------------------------------------------------------------------------------------------------------------------------------------------------------------------------------------------------------------------------------------------------------------------------------------------------------------------------------------------------------------------------------------------------------------------------------------------------------------------------------------------------------------------------------------------------------------------------------------------------------------------------------------------------------------------------------------------------------------------------------------------------------------------------------------------------------------------------------------------------------------------------------------------------------------------------------------------------------------------------------------------------------------------------------------------------------------------------------------------------------------------------------------------------------------------------------------------------------------------------------------------------------------------------------------------------------------------------------------------------------------------------------------------------------------------------------------------------------------------------------------------------------------------------------------|------------------|
| <p><b>Title</b> - Qualitative exploration of socio-cultural determinants of health inequities of Dalit population in Bangladesh</p>                                                                                                                                                                                                                                                                                                                                                                                                                                                                                                                                                                                                                                                                                                                                                                                                                                                                                                                                                                                                                                                                                                                                                                                                                                                                                                                                                                                                                               | <u>1</u>         |
| <p><b>Abstract</b></p> <p>Dalits (<i>jaat</i> sweepers), a marginalised traditional working community, have relatively poor access to healthcare services. This study sought to explore the socio-political and cultural factors associated with health inequalities among Dalits in an urban setting.</p> <p>An exploratory qualitative study design was adopted. The acquired data was analysed using an iterative approach which incorporated deductive and inductive methods in identifying codes and themes.</p> <p>This study was conducted in two sweeper communities in Dhaka city. Participants were Dalit men and women (fourteen in-depth interviews, mean age±SD 30±10; and five focus group discussions), and the community leaders and NGO workers (seven key informant interviews).</p> <p>Dalits (untouchables) are typically considered to fall outside the caste-based social structure and existing vulnerabilities are embedded and reinforced by this identity. Dalits' experience of precarious access to healthcare or poor healthcare is an important manifestation of these inequalities and has implications for the economic and social life of Dalit populations living together in geographically constrained spaces.</p> <p>A better understanding of the precise influences of socio-cultural determinants of health inequalities is needed, together with the identification of the strategies and programmes needed to address these determinants with the aim of developing more inclusive health service delivery systems.</p> | <u>2-3</u>       |

## Introduction

|                                                                                                                                                                                                                                                                                                                                                                                                                                                                                                                                                                                                                                                                                                                                                                                                                                                                                                   |          |
|---------------------------------------------------------------------------------------------------------------------------------------------------------------------------------------------------------------------------------------------------------------------------------------------------------------------------------------------------------------------------------------------------------------------------------------------------------------------------------------------------------------------------------------------------------------------------------------------------------------------------------------------------------------------------------------------------------------------------------------------------------------------------------------------------------------------------------------------------------------------------------------------------|----------|
| <p><b>Problem formulation</b> – In recent years Bangladesh has achieved remarkable progress in terms of health targets. However, these advances are experienced unequally across the population, often leaving behind individuals and communities that are economically marginalised and socially excluded. Improved health services, especially those provided by the state, are not yet effectively distributed to all individuals and groups, and frequently fail to reach ethnic minorities, people living in remote areas, extremely poor individuals, slum and pavement dwellers, and other marginalised groups. Several studies in Bangladesh have highlighted the socio-economic issues and discrimination encountered by the Dalit population; however, the socio-political and cultural factors that contribute to generating severe health inequalities remain largely unexplored.</p> | <u>3</u> |
| <p><b>Purpose or research question</b> – To explore the political, social, economic, and cultural determinants of health inequalities experienced by the majority of the Dalit population.</p>                                                                                                                                                                                                                                                                                                                                                                                                                                                                                                                                                                                                                                                                                                    | <u>7</u> |

## Methods

|                                                                                                                                                                                                                                                                                                                                                                                                                                                                                                                                                                                                                                                                                                                                                                                                                                        |                   |
|----------------------------------------------------------------------------------------------------------------------------------------------------------------------------------------------------------------------------------------------------------------------------------------------------------------------------------------------------------------------------------------------------------------------------------------------------------------------------------------------------------------------------------------------------------------------------------------------------------------------------------------------------------------------------------------------------------------------------------------------------------------------------------------------------------------------------------------|-------------------|
| <p><b>Qualitative approach and research paradigm</b> – We adopted a qualitative approach (phenomenological). ‘Commission on Social Determinants of Health (CSDH) Conceptual Framework’ proposed by the World Health Organization (WHO) in 2010 guided our analysis.</p>                                                                                                                                                                                                                                                                                                                                                                                                                                                                                                                                                                | <p><u>8</u></p>   |
| <p><b>Researcher characteristics and reflexivity</b> – Three researchers graduated in anthropology and public health conducted interviews, performed analysis, report the finding. The researchers have a vast experience in qualitative research. We <b>adhered</b> <b>obtain</b> to the trustworthiness by applying four principles—credibility, transferability, conformability, and dependability. We used inter-coder or synchronic reliability that refers to the amount of agreement between independent coders of the data. We measured the agreement during the analysis when the researchers’ coded same interviews independently. We furthermore performed triangulation between methods, and participants.<sup>22</sup></p>                                                                                                | <p><u>n/a</u></p> |
| <p><b>Context</b> – This study was conducted in two sweeper communities in Dhaka city: the <i>Agargaon</i> Public Works Department (PWD) Sweeper Colony, and the Ganaktuli sweeper colony located in the city’s Hazaribagh area. Commonly, the sweepers in Agargaon and Ganakatuli are known as <i>Telegu</i> and <i>Kanpuri</i>, respectively. There are no official statistics providing precise population figures for these colonies, although secondary sources indicate that each includes approximately 1,000 families</p>                                                                                                                                                                                                                                                                                                      | <p><u>10</u></p>  |
| <p><b>Sampling strategy</b> - Using several data collection tools we achieved maximum variation within the sample, purposefully collecting data from participants with various backgrounds, e.g. differing in terms of age, occupation, gender, position within the household, status within the community (leaders), and members of non-governmental organisations (NGOs, henceforth)</p>                                                                                                                                                                                                                                                                                                                                                                                                                                             | <p><u>10</u></p>  |
| <p><b>Ethical issues pertaining to human subjects-</b> The study protocol was approved and ethical approval was obtained from the ‘ethics review committee’ at Dhaka University, Bangladesh. Written informed consent was taken and documented via audio recording. Before obtaining consent the research objectives were explained, together with the importance of the study, confidentiality rules, possible harms and benefits, and the participants’ right to withdraw from the interviews at any stage during the conversation. Confidentiality of the personal identification of all participants was strictly maintained, with these details only being used by the researchers. Data was analysed using the participant identification (ID) number only and these ID number were removed prior to reporting the findings.</p> | <p><u>14</u></p>  |
| <p><b>Data collection methods</b> - Qualitative data was collected using 14 in-depth interviews with Dalit men and women, 5 focus group discussions with people from the Dalit community, and 7 key informant interviews. The acquired data was analysed using an iterative approach which incorporated deductive and inductive methods in identifying codes and themes.</p>                                                                                                                                                                                                                                                                                                                                                                                                                                                           |                   |
| <p><b>Data collection instruments and technologies</b> – We used three data collection tools—in-depth interview (IDI), focus group discussion (FGD), and key informant interview (KII). We maintained maximum variation within the sample as we used purposive sampling to select the participants on the basis of key variables including age, gender and occupation.</p>                                                                                                                                                                                                                                                                                                                                                                                                                                                             | <p><u>n/a</u></p> |

|                                                        |                                                                                                                                                                                                                                                                                                                                                                                                                                                                                                                                                                                                                                                                                                                                                        |                       |
|--------------------------------------------------------|--------------------------------------------------------------------------------------------------------------------------------------------------------------------------------------------------------------------------------------------------------------------------------------------------------------------------------------------------------------------------------------------------------------------------------------------------------------------------------------------------------------------------------------------------------------------------------------------------------------------------------------------------------------------------------------------------------------------------------------------------------|-----------------------|
| 1<br>2<br>3                                            | <b>Units of study</b> – Socio demographic and contextual characteristics were explained to provide a deeper understanding of the phenomena. Individual health seeking experience was described accordingly.                                                                                                                                                                                                                                                                                                                                                                                                                                                                                                                                            | <a href="#">n/a</a>   |
| 4<br>5<br>6<br>7                                       | <b>Data processing</b> - The analysis process was adequately accomplished by the team of researchers, who have different educational backgrounds and training, through regular collaboration and discussions, self-reflexivity, and triangulation of method and context (field sites), ensuring that no one researcher’s view was predominant.                                                                                                                                                                                                                                                                                                                                                                                                         | <a href="#">n/a</a>   |
| 8<br>9<br>10<br>11<br>12<br>13<br>14<br>15<br>16<br>17 | <b>Data analysis</b> - To analyse the qualitative data we used an iterative approach which blended deductive and inductive methods to identify and generate codes and themes. Initially, a deductive approach was used through the use of interview guides, which provided a primary template for the framework of data coding. The researchers independently read and reread a few transcripts and identified codes which were incorporated into the coding framework in an inductive form which mirrored the ideas, perceptions, practices, and concepts, concentrating on the health and health services of the participants. After coding all of the interviews we looked for clusters of several codes, which were termed ‘themes’ or ‘concepts’. | <a href="#">12/13</a> |
| 18<br>19<br>20<br>21<br>22<br>23<br>24<br>25           | <b>Techniques to enhance trustworthiness</b> - “In this study, we adhered to the trustworthiness by applying four principles—credibility, transferability, conformability, and dependability. We used inter-coder or synchronic reliability that refers to the amount of agreement between independent coders of the data. We measured the agreement during the analysis when the researchers’ coded same interviews independently. We furthermore performed triangulation between methods, and participants.”                                                                                                                                                                                                                                         |                       |

## Results/findings

|                                                                      |                                                                                                                                                                                                                                                                                                                                                                                                                                                                                                                                                                                                           |                     |
|----------------------------------------------------------------------|-----------------------------------------------------------------------------------------------------------------------------------------------------------------------------------------------------------------------------------------------------------------------------------------------------------------------------------------------------------------------------------------------------------------------------------------------------------------------------------------------------------------------------------------------------------------------------------------------------------|---------------------|
| 26<br>27<br>28<br>29<br>30<br>31<br>32<br>33<br>34<br>35<br>36<br>37 | <b>Synthesis and interpretation</b> - The health status of members of these Dalit groups is determined by an array of social, economic and political factors. As Dalits (untouchables) are typically considered to fall outside the caste-based social structure and existing vulnerabilities are embedded and reinforced by this identity. Dalits’ experience of precarious access to healthcare or poor healthcare is an important manifestation of these inequalities and has implications for the economic and social life of Dalit populations living together in geographically constrained spaces. | <a href="#">n/a</a> |
| 38<br>39<br>40<br>41                                                 | <b>Links to empirical data</b> – quotes were used in the result sections where it suits best.                                                                                                                                                                                                                                                                                                                                                                                                                                                                                                             | <a href="#">n/a</a> |

## Discussion

|                                                    |                                                                                                                                                                                                                                                                                                                                                                                                                                                                                                                                                                               |                     |
|----------------------------------------------------|-------------------------------------------------------------------------------------------------------------------------------------------------------------------------------------------------------------------------------------------------------------------------------------------------------------------------------------------------------------------------------------------------------------------------------------------------------------------------------------------------------------------------------------------------------------------------------|---------------------|
| 42<br>43<br>44<br>45<br>46<br>47<br>48<br>49<br>50 | <b>Integration with prior work, implications, transferability, and contribution(s) to the field</b> - The provision of clinical healthcare services alone is insufficient to mitigate the negative effects of discriminations and to improve the health status of Dalits. A better understanding of the precise influences of socio-cultural determinants of health inequalities is needed, together with the identification of the strategies and programmes needed to address these determinants with the aim of developing more inclusive health service delivery systems. | <a href="#">n/a</a> |
| 51<br>52<br>53<br>54<br>55<br>56<br>57             | <b>Limitations</b> - The results of this study are based on data collected from the Dalit population in Dhaka City; therefore, the results may not be transferable to other settings, for example a small Bangladeshi town. Nonetheless, considering the data collected, we believe that this study provides an in-depth understanding of a set of social, cultural, economic and political factors that strongly determine the health outcomes of Dalits.                                                                                                                    | <a href="#">34</a>  |

1  
2  
3  
4  
5  
6  
7  
8  
9  
10  
11  
12  
13  
14  
15  
16  
17  
18  
19  
20  
21  
22  
23  
24  
25  
26  
27  
28  
29  
30  
31  
32  
33  
34  
35  
36  
37  
38  
39  
40  
41  
42  
43  
44  
45  
46  
47  
48  
49  
50  
51  
52  
53  
54  
55  
56  
57  
58  
59  
60

**Other**

|                                                                                             |           |
|---------------------------------------------------------------------------------------------|-----------|
| <b>Conflicts of interest</b> - The authors declare that they have no conflicts of interest. | <u>37</u> |
| <b>Funding</b> - This study received no funding from any sources.                           | <u>37</u> |

For peer review only
